# Supplementary material for: Prevalence, Evolution, andcis-Regulation of Diel Transcription inChlamydomonas reinhardtii
Source: Oxford University Press journal article supplement (doi:10.1534/g3.114.015032), 2014-10-29
Supplement: 015032_015032si.pdf [file 015032_015032si.pdf]

## Prevalence, evolution and *cis*-regulation of diel transcription in *Chlamydomonas reinhardtii*

Nicholas Panchy<sup>\*</sup>, Guangxi Wu<sup>†</sup>, Linsey Newton<sup>‡</sup>, Chia-Hong Tsai<sup>‡,§</sup>, Jin Chen<sup>\*,§,\*\*</sup>, Christoph Benning<sup>††</sup>, Eva M. Farre<sup>\*,‡,1</sup>, Shin-Han Shiu<sup>\*,†,‡,1</sup>

<sup>\*</sup>Genetics Program, Michigan State University, East Lansing, MI 48824, USA

<sup>†</sup>Cellular and Molecular Biology Program, Michigan State University, East Lansing, MI 48824, USA

<sup>‡</sup>Department of Plant Biology, Michigan State University, East Lansing, MI 48824, USA

<sup>§</sup>MSU-DOE Plant Research Laboratory, Michigan State University, East Lansing, MI 48824, USA

<sup>\*\*</sup>Department of Computer Science & Engineering, Michigan State University, East Lansing, MI 48824, USA

<sup>††</sup>Department of Biochemistry and Molecular Biology, Michigan State University, East Lansing, MI 48824, USA

**DOI: 10.1534/g3.114.015032**

## SUPPLEMENTAL MATERIALS AND METHODS

**Determining threshold scores for COSPOT and DFT**

MITTAG *et al.* (2005) lists 18 proteins in *C. reinhardtii* which have previously show to exhibit circadian changes in the rate of transcription or concentration of mRNA. Amino acids sequences of these proteins were identified through KEGG and mapped to the *C. reinhardtii* genome using the TBLASTN tool available through Phytozome. We found fifteen proteins which mapped unambiguously to the *C. reinhardtii* genome and had matching annotation, only one of which was not present in the mRNA seq data set (**Table S4**).

To define a cutoff threshold for each of our methods, COSPOT and the DFT, each program was evaluated against our gold-standard set three different *p*-values thresholds (or the equivalent cyclic-score): 0.05, 0.02, and 0.01. For each *p*-value threshold, the coverage of both the gold-standard set and the whole *C. reinhardtii* genome is reported in **Table S5**. At each *p*-value threshold, the union of predictions from methods was used to define cyclically expressed genes in *C. reinhardtii*. As such, the *p*-value of the new two-dimensional threshold is defined by the joint distribution of COSPOT and DFT scores. Calculating this value is complicated by the fact that these scores are highly correlated ( $R^2 > 0.7$ ), but the joint probability can be estimated using a randomized population of expression vectors (**Table S6**). For every test *p*-value threshold, the increase in joint probability (compared to individual significant thresholds) was relatively moderate whereas coverage of the gold standard increased by as much 20% over a single method. We chose to use the combination of COSPOT&DFT as our predictive method with a test *p*-value threshold of 0.02, which balances in the inflation of the joint probability with the coverage of the gold standard set.

The combined method is most effective at excluding non-cycling genes, rather than defining cycling genes, which can be seen by looking at the correlation of both methods at different scoring threshold. (**Figure S7**). While the overall correlation between both methods is high, the correlation amongst highly scoring genes (exceeding the 0.02 threshold for either method) is actually quite low ( $R^2 < 0.2$ ). Genes which score very highly with one method may be at or just below the margin for the other, however, a gene which scores poorly in one method generally scores poorly with the other. Therefore, we chose a more conservative score threshold as a cautionary measure.

**Derivation of the model of duplicate gene divergence**

Divergence of expression state was modeled using the following system of difference equations:

$$C_{t+1} = C_t \cdot (1 - d) + \frac{D_t s}{2} \quad (3)$$

$$N_{t+1} = N_t \cdot (1 - d) + \frac{D_t s}{2} \quad (4)$$

$$D_{t+1} = D_t \cdot (1 - s) + C_t d + N_t d \quad (5)$$

Where C, N, and D represent the frequencies of cycling, non-cycling, and divergent duplicates at a given *Ks* (subscript “t”) and the subsequent *Ks* (subscript “t+1”). The variables d and s are, respectively, the probabilities of divergence from the identical state and reversion to the identical state. Since the null model assumes no bias, d and s are insensitive to whether the identical state is cycling or non-cycling.

Solving equations (3) and (4) for d, we obtain:

$$d = 1 + \frac{D_t s}{2C_t} - \frac{C_{t+1}}{C_t} \quad (6)$$

$$d = 1 + \frac{D_t s}{2N_t} - \frac{N_{t+1}}{N_t} \quad (7)$$

Using the property that the right hand sides of (6) and (7) must be equal, we arrive at the following formula for  $s$  that depends solely on duplicate frequencies:

$$s = \frac{\frac{2C_{t+1}}{C_t D_t} - \frac{2N_{t+1}}{N_t D_t}}{\frac{1}{C_t} - \frac{1}{N_t}} \quad (8)$$

Initial conditions were set equal to values of  $C$ ,  $D$ , and  $N$  observed at  $Ks = 0.3$ . We first attempted to fit values for  $d$  and  $s$  using frequencies at  $Ks$  0.3 and 0.6, however because the percentage change in  $C$  is greater than  $N$ , we obtained a negative value for  $s$ . Since  $s$  is a probability, this results is unrealistic, so instead we fit  $d$  and  $s$  using  $Ks$  0.6 and 0.9, obtaining values for  $d$  (0.42) and  $s$  (0.53) that were within  $[0,1]$ . Using these parameters, our model was able to replicate the overall behavior we observed, including the initial dip in  $C$ , though the percentage change is less than that of  $N$  (**Figure S3**). The root mean squared error between our predictions and observation was 0.03.

#### REFERENCES

MITTAG, M., S. KIAULEHN and C. H. JOHNSON, 2005 The circadian clock in *Chlamydomonas reinhardtii*. What is it for? What is it similar to? *Plant Physiol* 137: 399-40

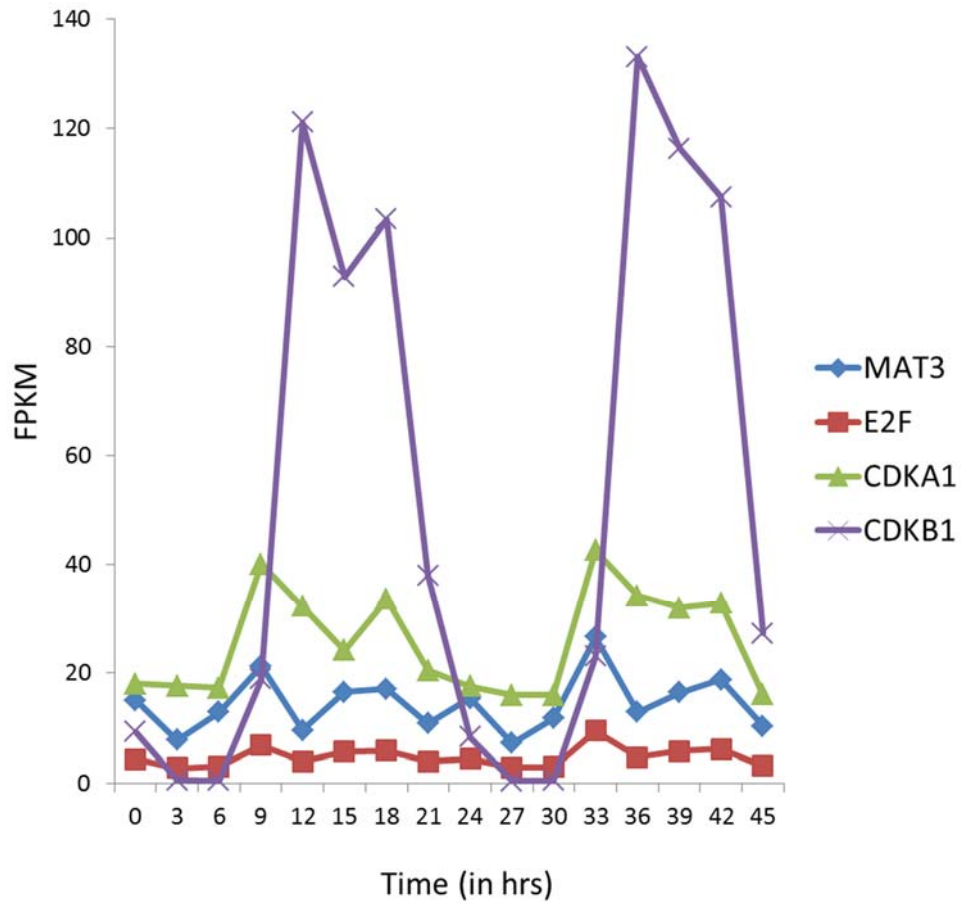

**Figure S1** Expression profiles of cell cycle genes (MAT3, E2F, CDKA1, and CDKB1) in *C. reinhardtii* grown in TAP (Tris-Acetate-Phosphate) culture. As observed in previous studies of *C. reinhardtii* grown on autotrophic conditions (BISOVA et al. 2005), MAT3, CDKA1, and CDKB1 are most highly expressed between 12 and 18 hours after dawn, while E2F expression increases slightly earlier (between 6 and 9 hours).

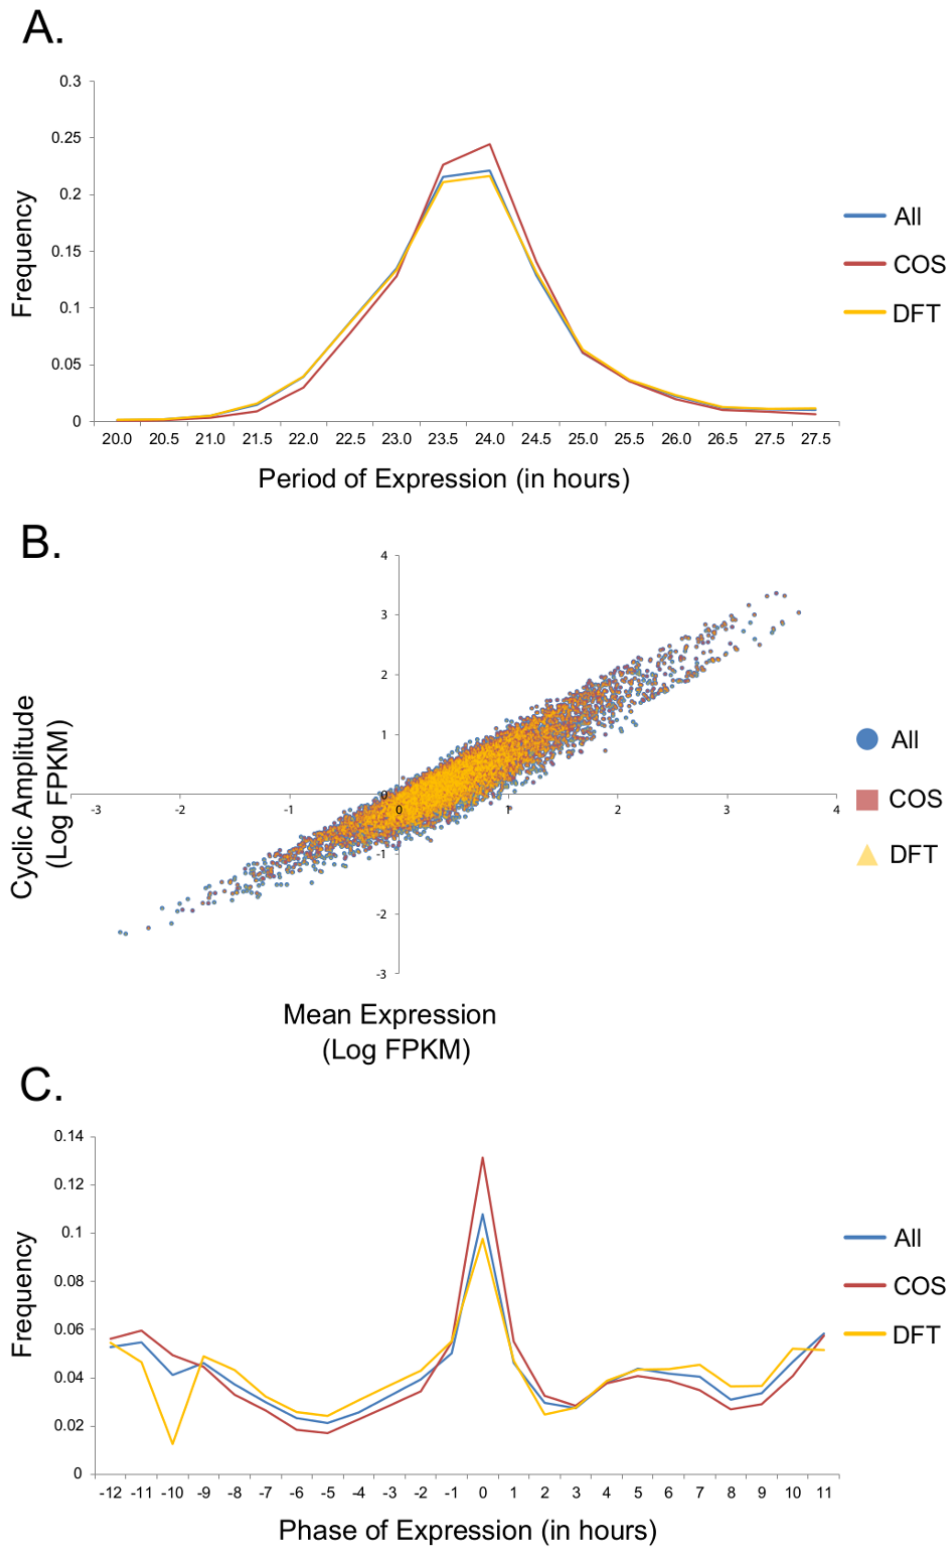

**Figure S2** Period, amplitude, and phase of cyclic expression amongst predictions made by COSPOT, DFT, and both methods combined. (A) The distribution of the period of expression in cycling genes predicted by COSPOT (red), DFT (yellow) and both methods combined (blue). (B) Mean expression (x-axis) vs. the amplitude of cyclic expression (y-axis) of cycling genes. Color labels follow (A). (C) Phase of expression of cycling genes. Color labels follow (A).

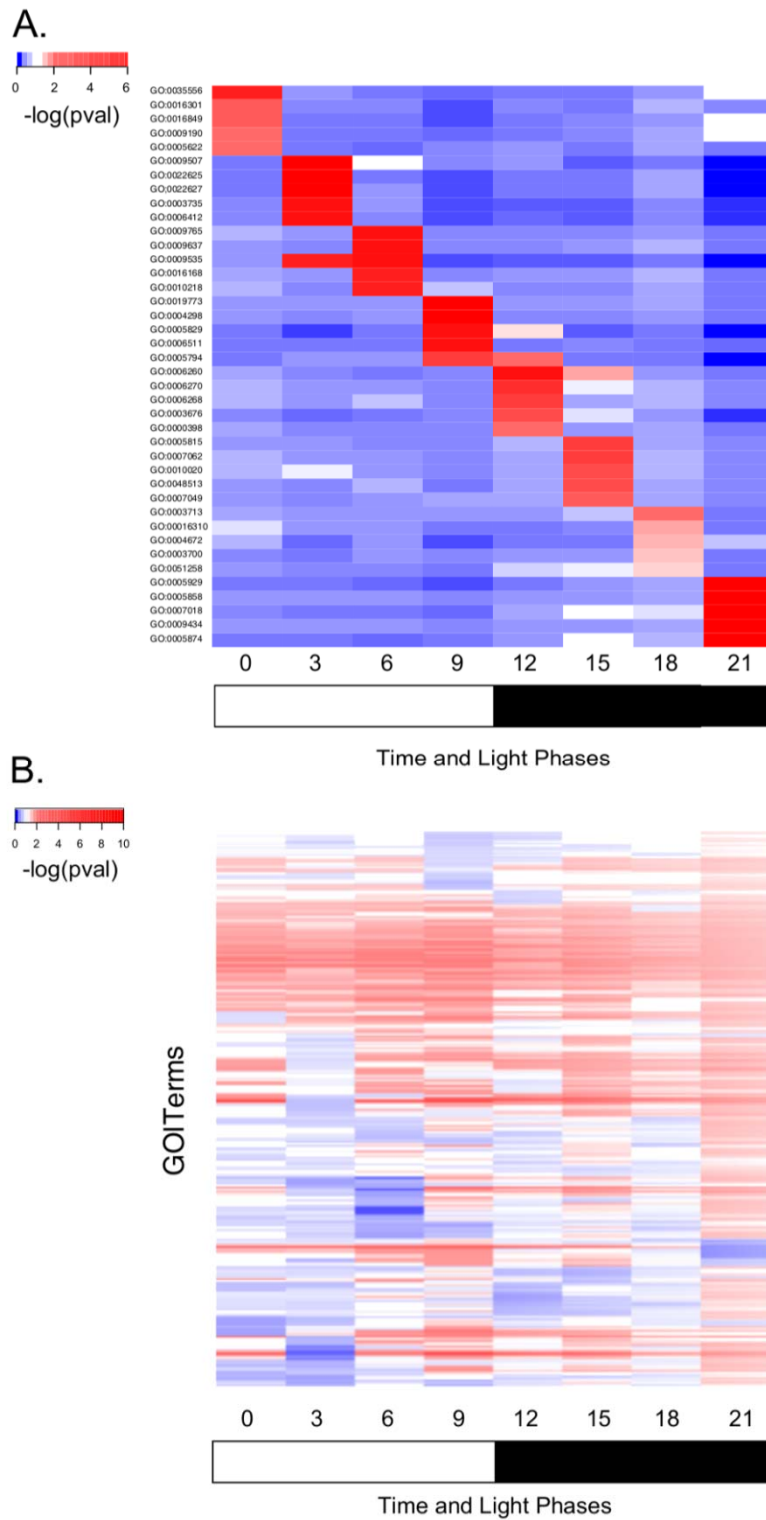

**Figure S3** Most over- and under-enriched GO terms amongst phase clusters of cycling genes. (A) Heatmap showing the  $-\log_{10}$  transformed Fisher's exact test  $p$ -values ( $pval$ ) of the top five GO terms with over-represented numbers of genes in each phase cluster (ZT 0, 3, 6, 9, 12, 15, 18, and 21). (B) Heatmap showing transformed  $p$ -values of GO terms with under-represented numbers of genes in at least one phase cluster (same as in (A)).  $P$ -values were calculated and transformed as in part (A) except that the left-tail  $p$ -value was used.

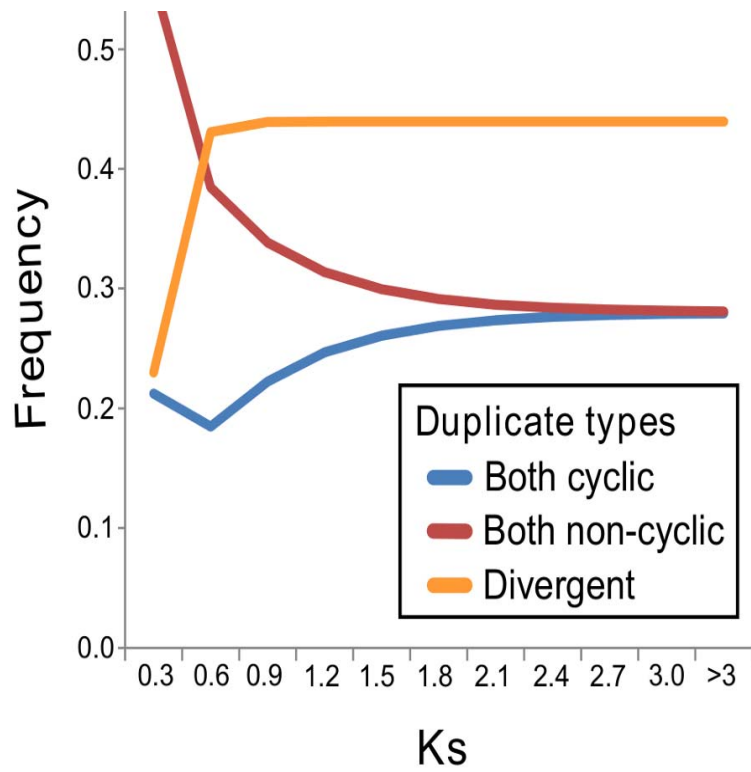

**Figure S4** Divergence of duplicate gene expression state modeled as a system of difference equations. The frequency at which duplicate pairs in *C. reinhardtii* are both cycling (blue), both non-cycling (red), or divergent expression (orange) as a function of the synonymous substitution rate ( $K_s$ ). The difference equations used to generate these data are described in the Supporting Information.

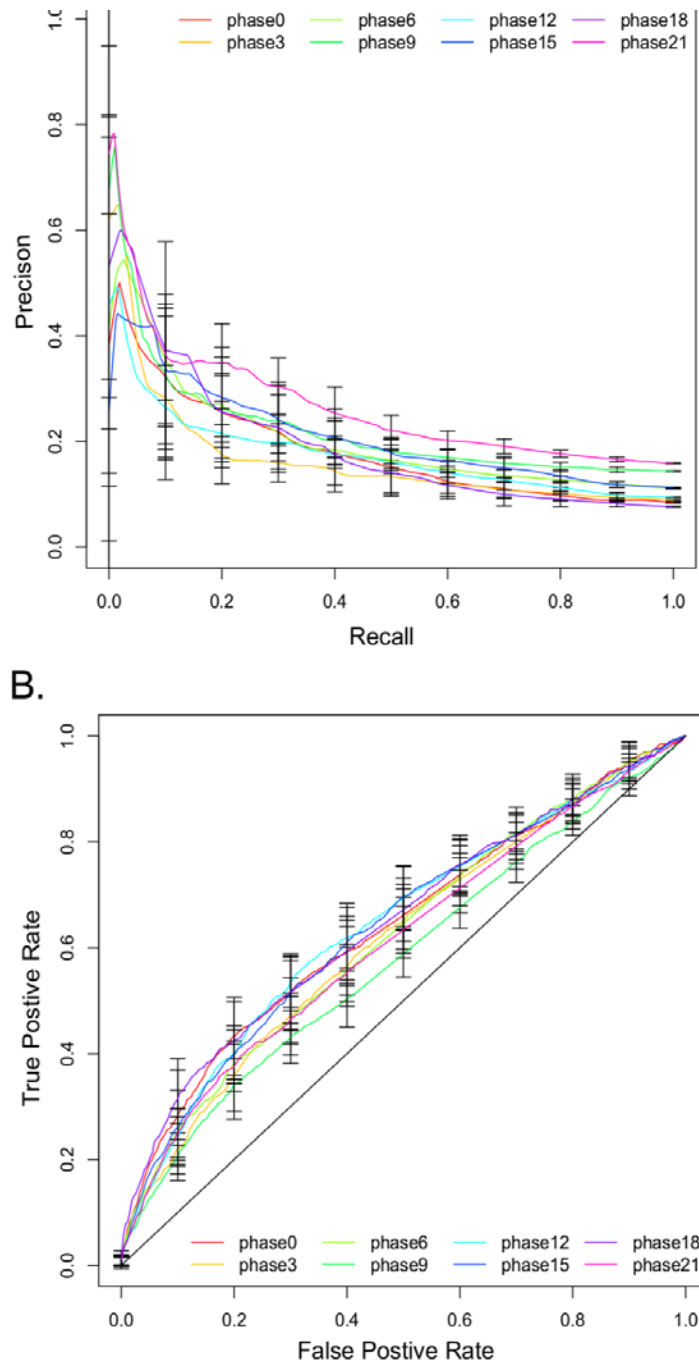

**Figure S5** Precision-recall and AUC-ROC curves of SVM predictions for *C. reinhardtii*. (A) Precision-recall curves for the prediction of the each of the eight phase clusters in cycling genes in *C. reinhardtii* as classified using SVM. Each phase-cluster is represented as a different colored line: 0 (red), 3 (orange), 6 (lime), 9 (green), 12 (teal), 15 (blue), 18 (purple), 21 (pink). Error bars represent the variance in 10 separate runs of the SVM classifier at optimal parameters. (B) ROC curves for the prediction of each of the eight phase clusters in cycling genes in *C. reinhardtii* as classified using SVM. Line color and error bars are assigned as in (A).



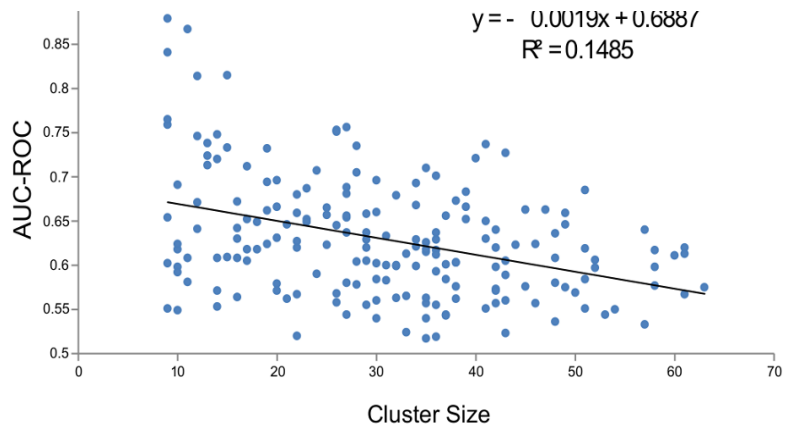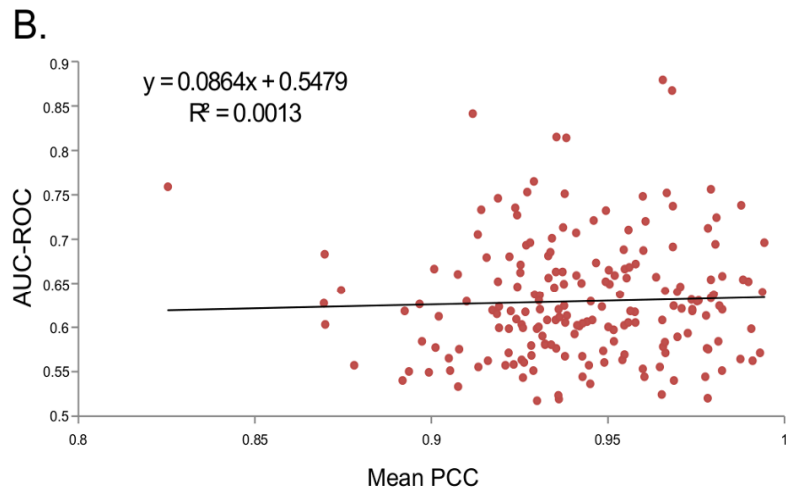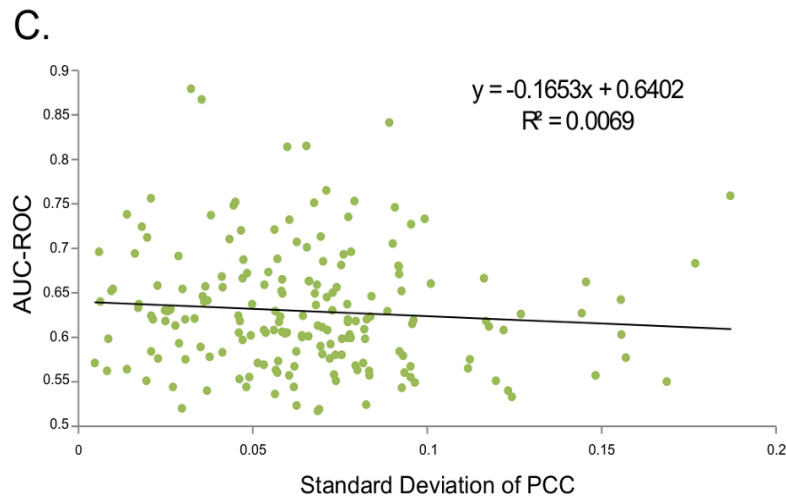

**Figure S6** Regression of the AUC-ROC of phase-expression clusters against cluster size, and Pearson Correlation Coefficient (PCC) of genes in the cluster. (A) Plot of phase-expression cluster size against AUC-ROC. The black line indicates the best linear regression of AUC-ROC against cluster size. The equation is reported above the figure. (B) Plot of the mean PCC amongst genes in each phase-expression cluster against AUC-ROC. The black line indicates the best linear regression of AUC-ROC against mean PCC. The equation is reported above the figure. (C) Plot of the standard deviation of PCC amongst genes in each expression cluster against AUC-ROC. The black line indicates the best linear regression of AUC-ROC against standard deviation of PCC. The equation is reported above the figure.

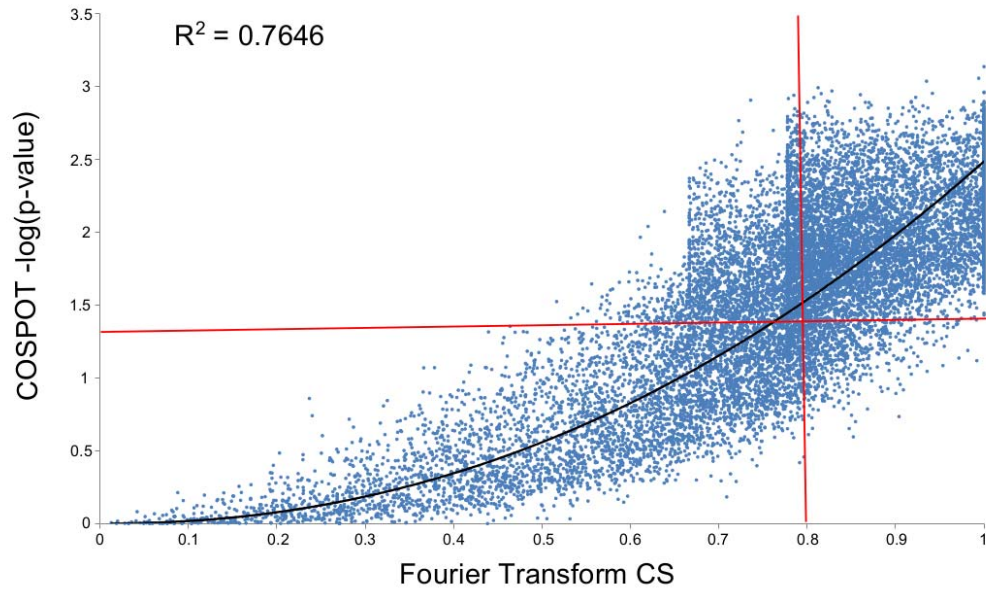

**Figure S7** Distribution of Fourier Transform cyclic score and COSPOT p-values. Plot of Fourier Transform cyclic score (x-axis) against the negative log transform of the COSPOT  $p$ -value (y-axis). The black line is the best fit power-law regression of the transformed COSPOT  $p$ -value against Fourier Transform cyclic score. The red lines indicated the score threshold at a significance level of  $\alpha < 0.02$  for the Fourier Transform cyclic score (vertical) and the transformed COSPOT  $p$ -value (horizontal).

**Table S1 Fisher's exact test p-values of GO terms with over-represented numbers of *C. reinhardtii* cycling genes**

| GO Term    | adjusted p-value <sup>1</sup> | Description                        |
|------------|-------------------------------|------------------------------------|
| GO:0019861 | 4.38E-28                      | flagellum                          |
| GO:0005929 | 3.07E-11                      | cilium                             |
| GO:0035086 | 4.41E-06                      | axoneme                            |
| GO:0005874 | 1.16E-04                      | microtubule                        |
| GO:0007018 | 4.59E-04                      | microtubule-based movement         |
| GO:0010287 | 4.59E-04                      | regulation of glucose transport    |
| GO:0003777 | 6.53E-04                      | microtubule motor activity         |
| GO:0009765 | 1.19E-03                      | carbohydrate mediated signaling    |
| GO:0022625 | 1.19E-03                      | cytosolic large ribosomal subunit  |
| GO:0006260 | 1.71E-03                      | DNA replication                    |
| GO:0030286 | 1.89E-03                      | dynein complex                     |
| GO:0005886 | 2.16E-03                      | plasma membrane                    |
| GO:0030030 | 6.12E-03                      | cell projection organization       |
| GO:0005794 | 6.52E-03                      | Golgi apparatus                    |
| GO:0042995 | 1.00E-02                      | cell projection                    |
| GO:0005198 | 1.00E-02                      | structural molecule activity       |
| GO:0003774 | 1.00E-02                      | motor activity                     |
| GO:0022627 | 1.00E-02                      | cytosolic small ribosomal subunit  |
| GO:0005774 | 1.42E-02                      | vacuolar membrane                  |
| GO:0009653 | 1.77E-02                      | anatomical structure morphogenesis |
| GO:0009535 | 1.77E-02                      | chloroplast thylakoid membrane     |
| GO:0009637 | 2.20E-02                      | response to blue light             |
| GO:0006364 | 2.20E-02                      | rRNA processing                    |
| GO:0005932 | 2.65E-02                      | microtubule basal body             |
| GO:0009506 | 2.65E-02                      | plasmodesmata                      |
| GO:0004674 | 2.65E-02                      | protein serine/threonine kinase    |
| GO:0005509 | 2.66E-02                      | calcium ion binding                |
| GO:0005488 | 2.75E-02                      | binding                            |
| GO:0030992 | 2.75E-02                      | intraciliary transport particle B  |
| GO:0009507 | 3.12E-02                      | chloroplast                        |
| GO:0010114 | 3.34E-02                      | response to red light              |
| GO:0010218 | 3.34E-02                      | response to far red light          |
| GO:0046686 | 3.79E-02                      | response to cadmium ion            |
| GO:0009523 | 4.16E-02                      | photosystem II                     |
| GO:0048046 | 4.21E-02                      | apoplast                           |
| GO:0006270 | 4.21E-02                      | DNA replication initiation         |
| GO:0009296 | 4.21E-02                      | flagellum assembly                 |
| GO:0010020 | 4.21E-02                      | chloroplast fission                |
| GO:0009434 | 4.21E-02                      | motile cilium                      |

---

|            |          |                                                |
|------------|----------|------------------------------------------------|
| GO:0044430 | 4.21E-02 | cytoskeletal part                              |
| GO:0019253 | 4.21E-02 | reductive pentose-phosphate cycle              |
| GO:0019773 | 4.21E-02 | proteasome core complex, alpha-subunit complex |
| GO:0009826 | 4.21E-02 | unidimensional cell growth                     |
| GO:0004298 | 4.33E-02 | threonine-type endopeptidase activity          |

---

1. Fisher Exact Test  $p$ -value adjusted according to Benjamini-Hochberg

**Table S2 Descriptions of the GO terms in each of the five broad functional categories**

| Category                                 | GO Terms                       | Description                                                   |
|------------------------------------------|--------------------------------|---------------------------------------------------------------|
| <b>photosynthesis and light response</b> | GO:0015671                     | oxygen transport                                              |
|                                          | GO:0009773                     | photosynthetic electron transport in photosystem I            |
|                                          | GO:0010206                     | photosystem II repair                                         |
|                                          | GO:0009765                     | photosynthesis, light harvesting                              |
|                                          | GO:0015979                     | photosynthesis                                                |
|                                          | GO:0010218                     | response to far red light                                     |
|                                          | GO:0009637                     | response to blue light                                        |
|                                          | GO:0010114                     | response to red light                                         |
|                                          | GO:0010304                     | PSII associated light-harvesting complex II catabolic process |
|                                          | GO:0010020                     | chloroplast fission                                           |
|                                          | GO:0009507                     | chloroplast                                                   |
|                                          | GO:0009579                     | thylakoid                                                     |
|                                          | GO:0009570                     | chloroplast stroma                                            |
|                                          | GO:0009941                     | chloroplast envelope                                          |
|                                          | GO:0009543                     | chloroplast thylakoid lumen                                   |
|                                          | GO:0009523                     | photosystem II                                                |
|                                          | GO:0009522                     | photosystem I                                                 |
|                                          | GO:0009533                     | chloroplast stromal thylakoid                                 |
|                                          | GO:0009534                     | chloroplast thylakoid                                         |
|                                          | GO:0010287                     | plastoglobule                                                 |
| GO:0009535                               | chloroplast thylakoid membrane |                                                               |
| GO:0016168                               | chlorophyll binding            |                                                               |
| <b>cell cycle and mitosis</b>            | GO:0006260                     | DNA replication                                               |
|                                          | GO:0006270                     | DNA replication initiation                                    |
|                                          | GO:0006268                     | DNA unwinding involved in replication                         |
|                                          | GO:0000910                     | cytokinesis                                                   |
|                                          | GO:0000724                     | double-strand break repair via homologous recombination       |
|                                          | GO:0006302                     | double-strand break repair                                    |
|                                          | GO:0007062                     | sister chromatid cohesion                                     |
|                                          | GO:0007067                     | mitosis                                                       |
|                                          | GO:0006259                     | DNA metabolic process                                         |
|                                          | GO:0007049                     | cell cycle                                                    |
|                                          | GO:0051726                     | regulation of cell cycle                                      |

|                                    |            |                                                             |
|------------------------------------|------------|-------------------------------------------------------------|
|                                    | GO:0006281 | DNA repair                                                  |
|                                    | GO:0051301 | cell division                                               |
|                                    | GO:0006310 | DNA recombination                                           |
|                                    | GO:0005819 | spindle                                                     |
|                                    | GO:0005815 | microtubule organizing center                               |
|                                    | GO:0005694 | chromosome                                                  |
|                                    | GO:0004003 | ATP-dependent DNA helicase activity                         |
|                                    | GO:0003887 | DNA-directed DNA polymerase activity                        |
|                                    | GO:0004386 | helicase activity                                           |
| <b>microtubules and flagella</b>   | GO:0000226 | microtubule cytoskeleton organization                       |
|                                    | GO:0007018 | microtubule-based movement                                  |
|                                    | GO:0009296 | flagellum assembly                                          |
|                                    | GO:0030030 | cell projection organization                                |
|                                    | GO:0042384 | cilium assembly                                             |
|                                    | GO:0015630 | microtubule cytoskeleton                                    |
|                                    | GO:0044430 | cytoskeletal part                                           |
|                                    | GO:0019861 | flagellum                                                   |
|                                    | GO:0030286 | dynein complex                                              |
|                                    | GO:0035086 | cilium axoneme                                              |
|                                    | GO:0005813 | centrosome                                                  |
|                                    | GO:0005932 | microtubule basal body                                      |
|                                    | GO:0005874 | microtubule                                                 |
|                                    | GO:0005929 | cilium                                                      |
|                                    | GO:0005856 | cytoskeleton                                                |
|                                    | GO:0005858 | axonemal dynein complex                                     |
|                                    | GO:0035085 | cilium axoneme                                              |
|                                    | GO:0009434 | motile cilium                                               |
|                                    | GO:0030992 | intraflagellar transport particle B                         |
|                                    | GO:0042995 | cell projection                                             |
|                                    | GO:0044463 | cell projection part                                        |
|                                    | GO:0005876 | spindle microtubule                                         |
|                                    | GO:0003777 | microtubule motor activity                                  |
|                                    | GO:0003774 | motor activity                                              |
|                                    | GO:0004835 | tubulin-tyrosine ligase activity                            |
| <b>mitochondria and metabolism</b> | GO:0006096 | glycolysis                                                  |
|                                    | GO:0006122 | mitochondrial electron transport, ubiquinol to cytochrome c |
|                                    | GO:0005983 | starch catabolic process                                    |
|                                    | GO:0006098 | pentose-phosphate shunt                                     |
|                                    | GO:0007005 | mitochondrion organization                                  |

---

|                                 |            |                                                                 |
|---------------------------------|------------|-----------------------------------------------------------------|
|                                 | GO:0006508 | proteolysis                                                     |
|                                 | GO:0015986 | ATP synthesis coupled proton transport                          |
|                                 | GO:0045261 | proton-transporting ATP synthase complex, catalytic core F(1)   |
|                                 | GO:0005750 | mitochondrial respiratory chain complex III                     |
|                                 | GO:0005747 | mitochondrial respiratory chain complex I                       |
|                                 | GO:0005739 | mitochondrion                                                   |
|                                 | GO:0005759 | mitochondrial matrix                                            |
|                                 | GO:0005741 | mitochondrial outer membrane                                    |
|                                 | GO:0005743 | mitochondrial inner membrane                                    |
|                                 | GO:0046933 | proton-transporting ATP synthase activity, rotational mechanism |
|                                 | GO:0046961 | proton-transporting ATPase activity, rotational mechanism       |
| <b>ribosome and translation</b> | GO:0006414 | translational elongation                                        |
|                                 | GO:0006412 | translation                                                     |
|                                 | GO:0022626 | cytosolic ribosome                                              |
|                                 | GO:0022625 | cytosolic large ribosomal subunit                               |
|                                 | GO:0022627 | cytosolic small ribosomal subunit                               |
|                                 | GO:0019843 | rRNA binding                                                    |
|                                 | GO:0003735 | structural constituent of ribosome                              |

---

**Table S3 Optimal parameters and performance measures of SVM classification**

| Phase | C <sup>1</sup> | R <sup>2</sup> | AUC-ROC | F-measure | Precision | Recall |
|-------|----------------|----------------|---------|-----------|-----------|--------|
| 0     | 0.01           | 4              | 0.64    | 0.22      | 0.24      | 0.20   |
| 3     | 0.1            | 1.5            | 0.62    | 0.21      | 0.14      | 0.39   |
| 6     | 0.1            | 4              | 0.62    | 0.19      | 0.26      | 0.15   |
| 9     | 0.1            | 2.5            | 0.58    | 0.22      | 0.27      | 0.18   |
| 12    | 0.01           | 3.5            | 0.64    | 0.19      | 0.21      | 0.18   |
| 15    | 0.1            | 1.5            | 0.64    | 0.27      | 0.21      | 0.40   |
| 18    | 0.1            | 4              | 0.65    | 0.23      | 0.24      | 0.23   |
| 21    | 0.01           | 3.5            | 0.61    | 0.21      | 0.38      | 0.15   |

1. C = minimum separation

2. R = ratio of negative to positive examples



**Table S4 “Gold Standard” cycling genes in *C. reinhardtii***

| Gene                     | Name                                         | Reference                        | Locus         | DFT Cyclic Score | COSPOT p-value |
|--------------------------|----------------------------------------------|----------------------------------|---------------|------------------|----------------|
| ATP2/ARF1                | ADP-ribosylation factor                      | MEMON <i>et al.</i> (1995)       | Cre17.g698000 | 0.90             | 1.9e-02        |
| CAH1                     | carbonic anhydrase                           | FUJIWARA <i>et al.</i> (1996)    | Cre04.g223100 | 0.76             | 1.7e-01        |
| CYC4                     | cytochrome c                                 | JACOBSHAGEN <i>et al.</i> (2001) | Cre16.g670950 | 0.78             | 6.2e-01        |
| Cytosolic thioredoxin h1 | Cytosolic thioredoxin h1                     | LEMAIRE <i>et al.</i> (1999)     | Cre09.g391900 | 0.29             | 4.0e-01        |
| FBA1                     | chloroplastic fructose-bisphosphate aldolase | JACOBSHAGEN <i>et al.</i> (2001) | Cre01.g006950 | 0.95             | 1.2e-02        |
| FBA2                     | chloroplastic fructose-bisphosphate aldolase | JACOBSHAGEN <i>et al.</i> (2001) | Cre02.g093450 | 0.83             | 3.4e-02        |
| FBA3                     | chloroplastic fructose-bisphosphate aldolase | JACOBSHAGEN <i>et al.</i> (2001) | Cre05.g234550 | 0.9              | 2.3e-02        |
| FBA4                     | chloroplastic fructose-bisphosphate aldolase | JACOBSHAGEN <i>et al.</i> (2001) | Cre02.g115650 | 0.61             | 1.9e-02        |
| FNR1                     | Ferredoxin NADP reductase                    | LEMAIRE <i>et al.</i> (1999)     | Cre11.g476750 | 0.81             | 2.4e-02        |
| HSP70B                   | 70kd family heat shock protein               | JACOBSHAGEN <i>et al.</i> (2001) | Cre06.250100  | 0.32             | 8.5e-01        |
| LCHII                    | Chlorophyll binding protein                  | JACOBSHAGEN <i>et al.</i> (1996) | Cre06.g283950 | 0.82             | 6.5e-03        |
| PRK1                     | phosphoribulokinase                          | LEMAIRE <i>et al.</i> (1999)     | Cre12.g554800 | 0.99             | 1.0e-02        |
| TUB1                     | Beta-tubulin                                 | JACOBSHAGEN & JOHNSON (1994)     | Cre12.g542250 | 0.67             | 1.1e-02        |
| TUB2                     | Beta-tubulin                                 | JACOBSHAGEN & JOHNSON (1994)     | Cre12.g549550 | 0.98             | 1.1e-02        |
| TufA                     | Elongation factor Tu                         | HWANG <i>et al.</i> (1996)       | Cre06.g259150 | 0.77             | 1.1e-02        |

**Table S5 Performance COSPOT and DFT on *C. reinhardtii***

| Method and $\alpha$ levels | Genome Coverage <sup>1</sup> | Gold Stand Coverage <sup>2</sup> |
|----------------------------|------------------------------|----------------------------------|
| <b>COSPOT</b>              |                              |                                  |
| $\alpha = 0.01$            | 21.0% (3590)                 | 6.7% (1)                         |
| $\alpha = 0.02$            | 37.4% (6400)                 | 46.7% (7)                        |
| $\alpha = 0.05$            | 54.9% (9392)                 | 73.3% (11)                       |
| <b>DFT</b>                 |                              |                                  |
| $\alpha = 0.01$            | 29.6% (5061)                 | 33.3% (5)                        |
| $\alpha = 0.02$            | 37.6% (6443)                 | 53.3% (8)                        |
| $\alpha = 0.05$            | 55.8% (9556)                 | 73.3% (11)                       |

1. Parentheses indicated the actual number of genes covered

2. Parentheses indicated how many of 15 gold standard genes are identified as cyclic

**Table S6 Performance of combining COPSOT and DFT on *C. reinhardtii***

| Test<br>P-value | Joint<br>Probability <sup>1</sup> | Overlap <sup>2</sup> | Genome Coverage <sup>3</sup> | Gold Stand Coverage <sup>4</sup> |
|-----------------|-----------------------------------|----------------------|------------------------------|----------------------------------|
| $\alpha = 0.01$ | 0.0134                            | 39.6% (2414)         | 35.7% (6236)                 | 40.0% (6)                        |
| $\alpha = 0.02$ | 0.0272                            | 56.7% (4579)         | 47.2% (8072)                 | 73.3% (11)                       |
| $\alpha = 0.05$ | 0.0734                            | 73.5% (8024)         | 61.7% (10552)                | 86.6% (13)                       |

1. The joint probability of a gene having a score with a p-value of  $\alpha$  in either COPSOT or DFT
2. Parentheses indicated the actual number of genes in the overlap set
3. Parentheses indicated the actual number of genes covered
4. Parentheses indicated how many of 15 gold standard genes are identified as cyclic

Files S2-S9

Available for download at <http://www.g3journal.org/lookup/suppl/doi:10.1534/g3.114.015032/-/DC1>

- File S2** Archive of gene trees in Nexus (.nex) format
- File S3** Fisher's exact test p-values of GO terms with over-represented numbers of *C. reinhardtii* cycling genes in each phase cluster
- File S4** Fisher's exact test p-values of GO terms with over-represented number of *A. thaliana* cycling genes in phase clusters
- File S5** All motifs enriched in the promoters of cycling genes in *C. reinhardtii* clustered by phase
- File S6** Phase, AUC-ROC, and composition of the best predicted expression clusters
- File S7** List of motifs which were informative in predicting phase-expression clusters in TAMO format
- File S8** Phase, AUC-ROC, and composition of the best predicted functional clusters
- File S9** List of motifs which were informative in predicting phase-function clusters in TAMO format
