# Supplementary material for: Prevalence, Evolution, andcis-Regulation of Diel Transcription inChlamydomonas reinhardtii
Source: Oxford University Press journal article supplement (doi:10.1534/g3.114.015032), 2014-10-29
Supplement: 015032_figures1.pdf [file 015032_figures1.pdf]

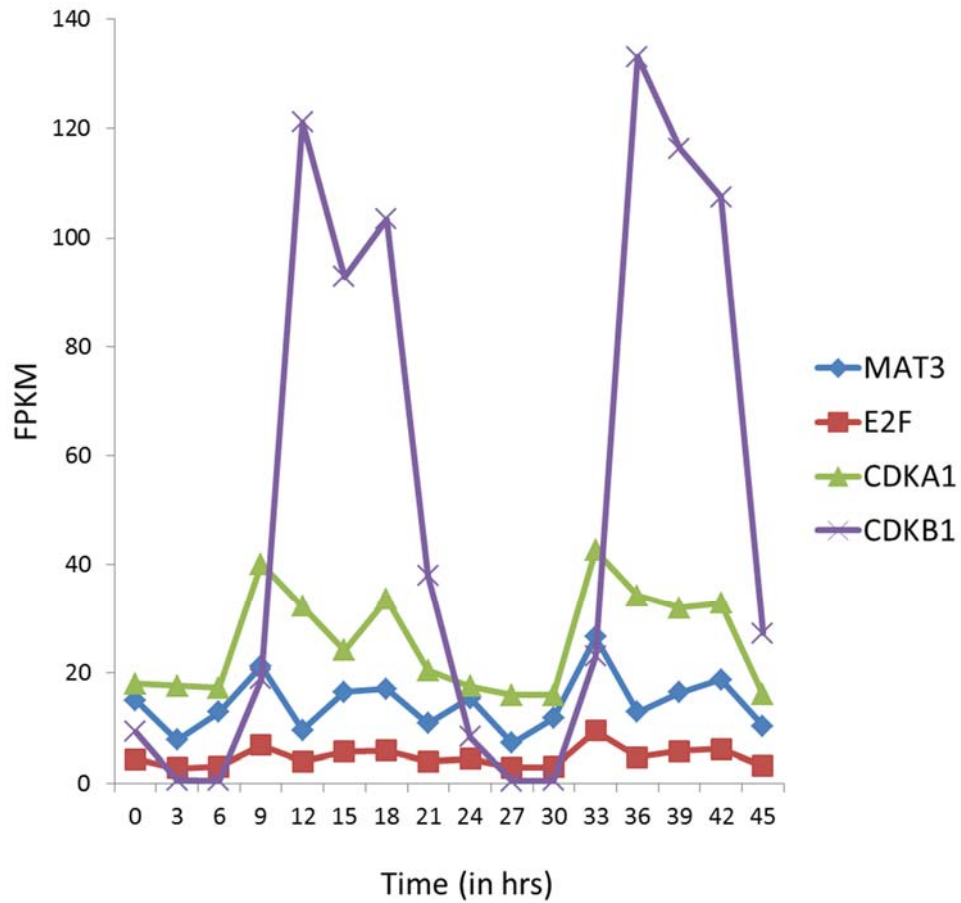

**Figure S1** Expression profiles of cell cycle genes (MAT3, E2F, CDKA1, and CDKB1) in *C. reinhardtii* grown in TAP (Tris-Acetate-Phosphate) culture. As observed in previous studies of *C. reinhardtii* grown on autotrophic conditions (BISOVA et al. 2005), MAT3, CDKA1, and CDKB1 are most highly expressed between 12 and 18 hours after dawn, while E2F expression increases slightly earlier (between 6 and 9 hours).
