# Supplementary material for: Prevalence, Evolution, andcis-Regulation of Diel Transcription inChlamydomonas reinhardtii
Source: Oxford University Press journal article supplement (doi:10.1534/g3.114.015032), 2014-10-29
Supplement: 015032_figures2.pdf [file 015032_figures2.pdf]

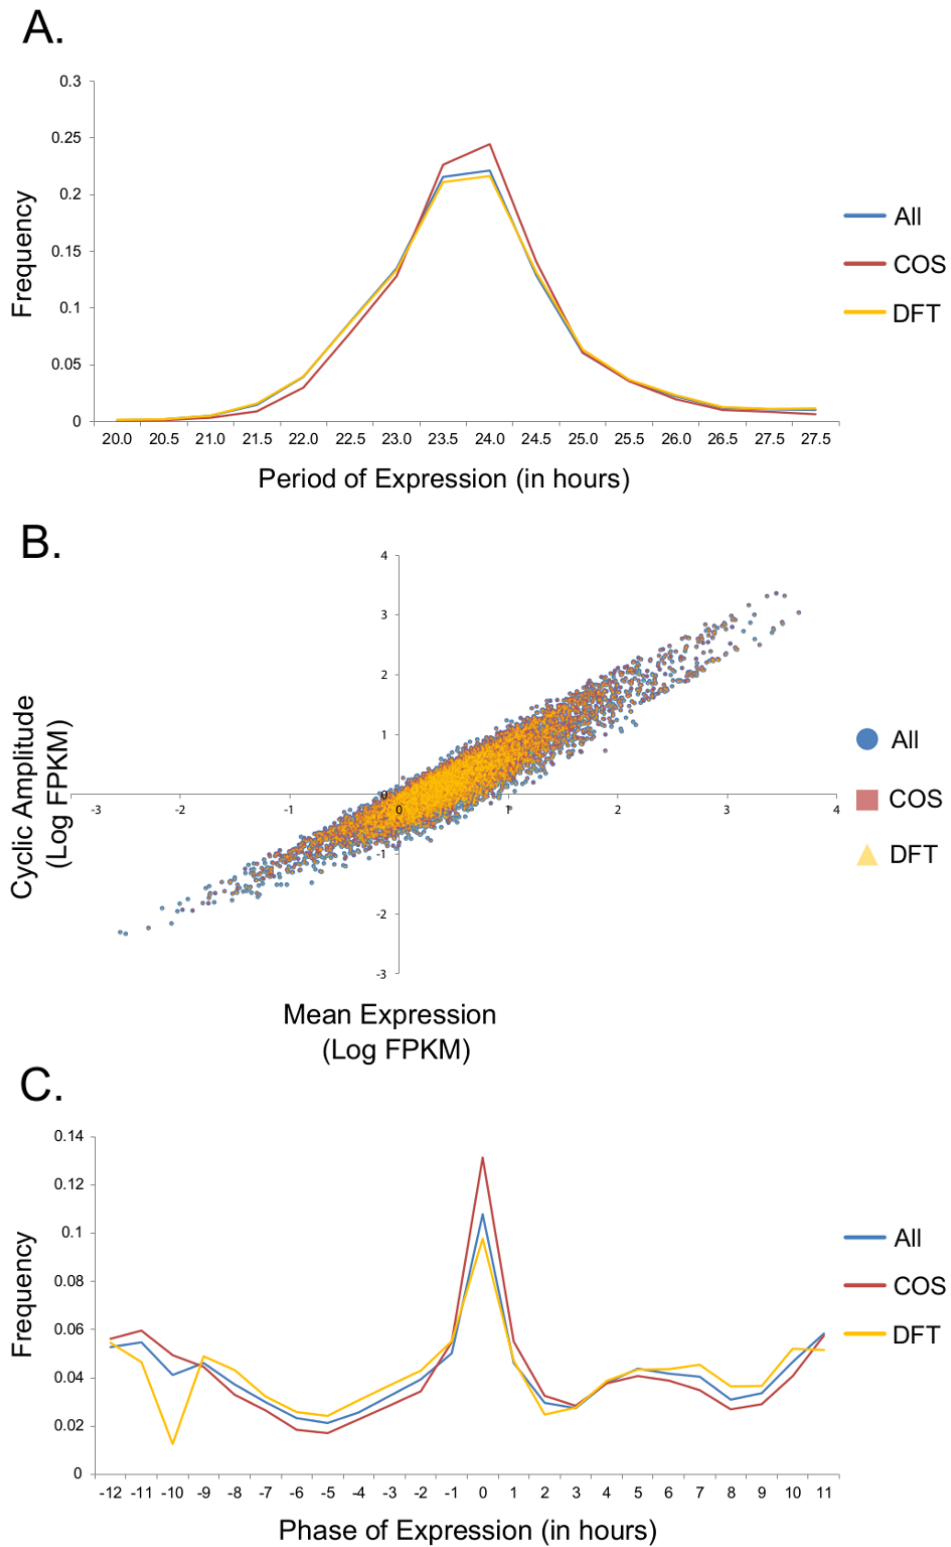

**Figure S2** Period, amplitude, and phase of cyclic expression amongst predictions made by COSPOT, DFT, and both methods combined. (A) The distribution of the period of expression in cycling genes predicted by COSPOT (red), DFT (yellow) and both methods combined (blue). (B) Mean expression (x-axis) vs. the amplitude of cyclic expression (y-axis) of cycling genes. Color labels follow (A). (C) Phase of expression of cycling genes. Color labels follow (A).
