# Supplementary material for: Prevalence, Evolution, andcis-Regulation of Diel Transcription inChlamydomonas reinhardtii
Source: Oxford University Press journal article supplement (doi:10.1534/g3.114.015032), 2014-10-29
Supplement: 015032_figures3.pdf [file 015032_figures3.pdf]

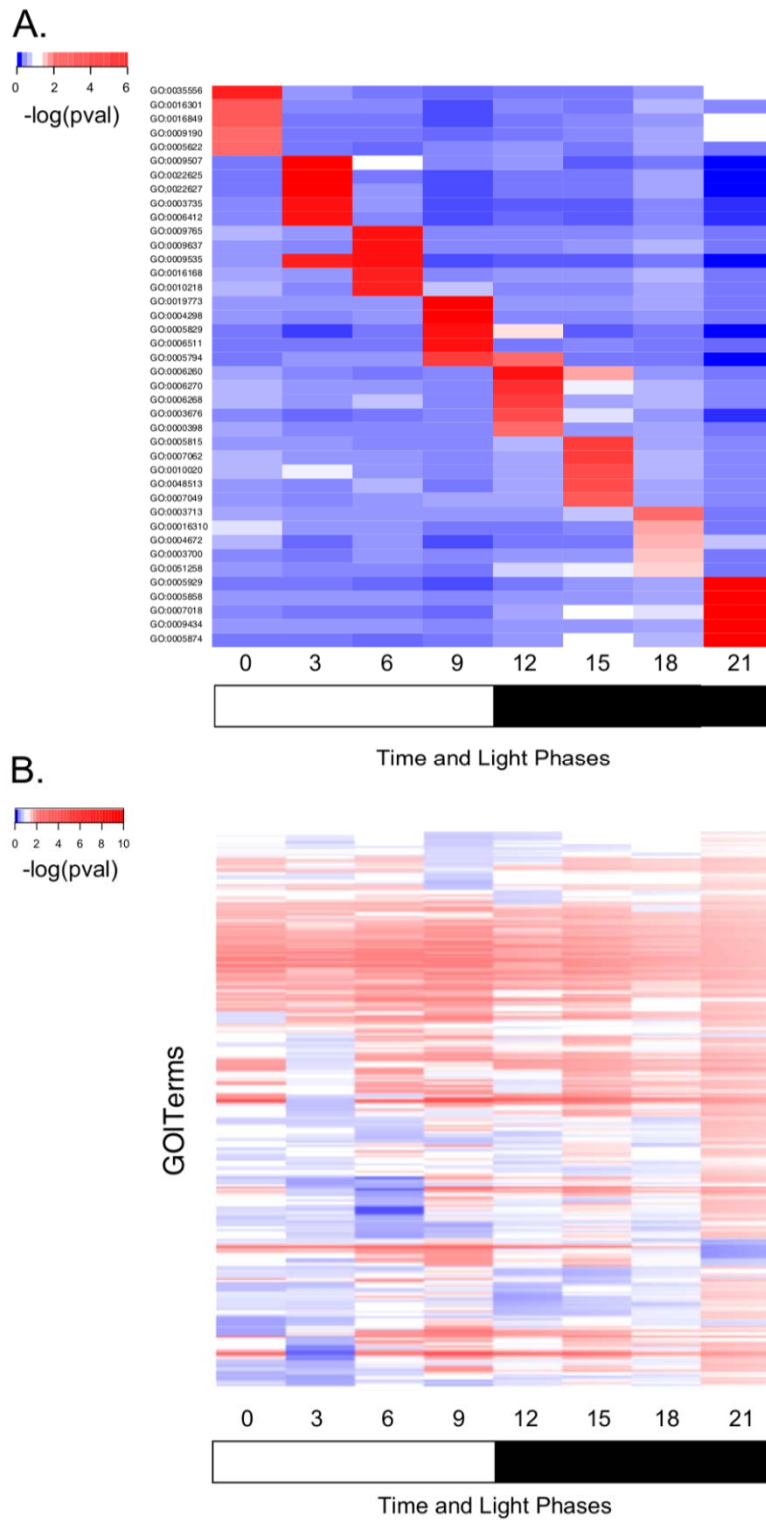

**Figure S3** Most over- and under-enriched GO terms amongst phase clusters of cycling genes. (A) Heatmap showing the  $-\log_{10}$  transformed Fisher's exact test  $p$ -values ( $pval$ ) of the top five GO terms with over-represented numbers of genes in each phase cluster (ZT 0, 3, 6, 9, 12, 15, 18, and 21). (B) Heatmap showing transformed  $p$ -values of GO terms with under-represented numbers of genes in at least one phase cluster (same as in (A)).  $P$ -values were calculated and transformed as in part (A) except that the left-tail  $p$ -value was used.
