# Supplementary material for: Prevalence, Evolution, andcis-Regulation of Diel Transcription inChlamydomonas reinhardtii
Source: Oxford University Press journal article supplement (doi:10.1534/g3.114.015032), 2014-10-29
Supplement: 015032_figures4.pdf [file 015032_figures4.pdf]

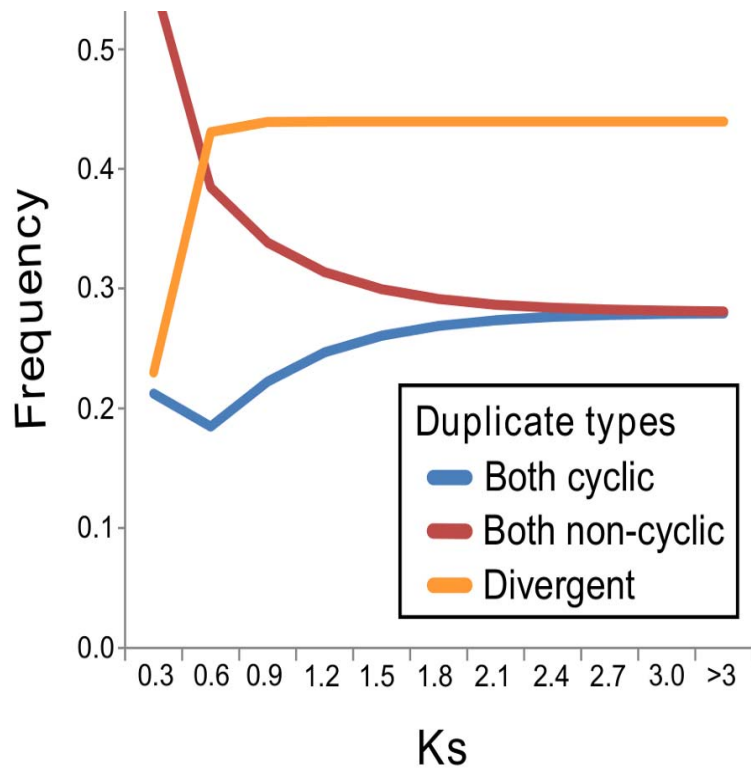

**Figure S4** Divergence of duplicate gene expression state modeled as a system of difference equations. The frequency at which duplicate pairs in *C. reinhardtii* are both cycling (blue), both non-cycling (red), or divergent expression (orange) as a function of the synonymous substitution rate ( $K_s$ ). The difference equations used to generate these data are described in the Supporting Information.
