# Supplementary material for: Prevalence, Evolution, andcis-Regulation of Diel Transcription inChlamydomonas reinhardtii
Source: Oxford University Press journal article supplement (doi:10.1534/g3.114.015032), 2014-10-29
Supplement: 015032_figures5.pdf [file 015032_figures5.pdf]

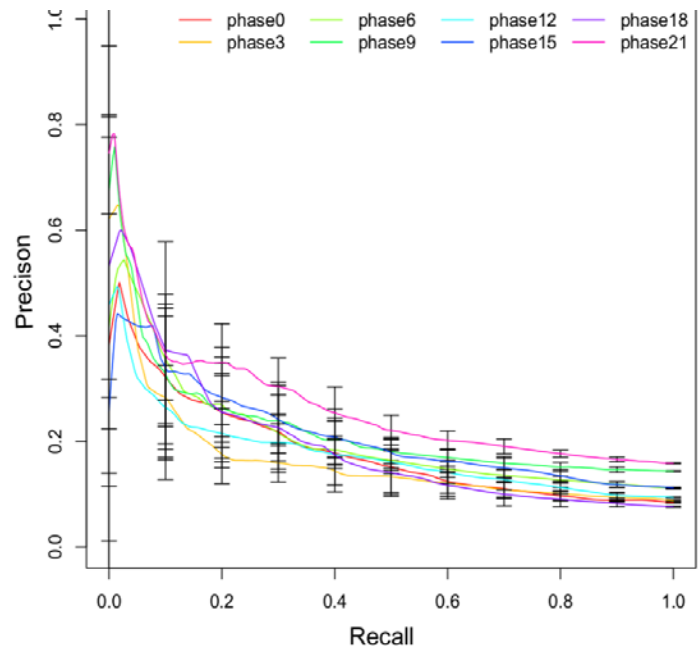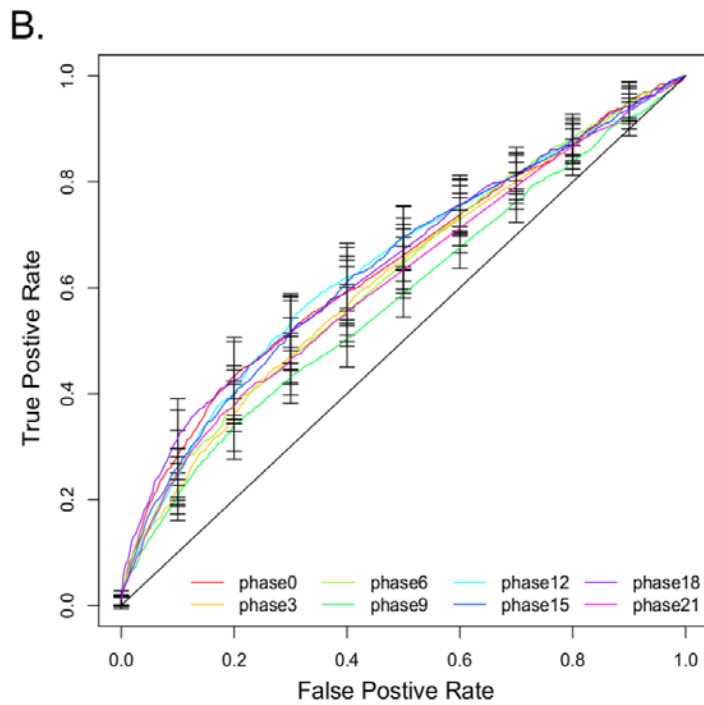

**Figure S5** Precision-recall and AUC-ROC curves of SVM predictions for *C. reinhardtii*. (A) Precision-recall curves for the prediction of each of the eight phase clusters in cycling genes in *C. reinhardtii* as classified using SVM. Each phase-cluster is represented as a different colored line: 0 (red), 3 (orange), 6 (lime), 9 (green), 12 (teal), 15 (blue), 18 (purple), 21 (pink). Error bars represent the variance in 10 separate runs of the SVM classifier at optimal parameters. (B) ROC curves for the prediction of each of the eight phase clusters in cycling genes in *C. reinhardtii* as classified using SVM. Line color and error bars are assigned as in (A).
