# Supplementary material for: Prevalence, Evolution, andcis-Regulation of Diel Transcription inChlamydomonas reinhardtii
Source: Oxford University Press journal article supplement (doi:10.1534/g3.114.015032), 2014-10-29
Supplement: 015032_figures6.pdf [file 015032_figures6.pdf]

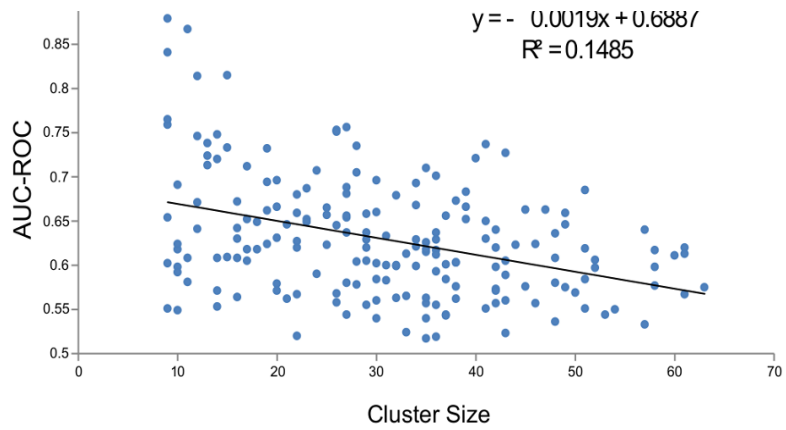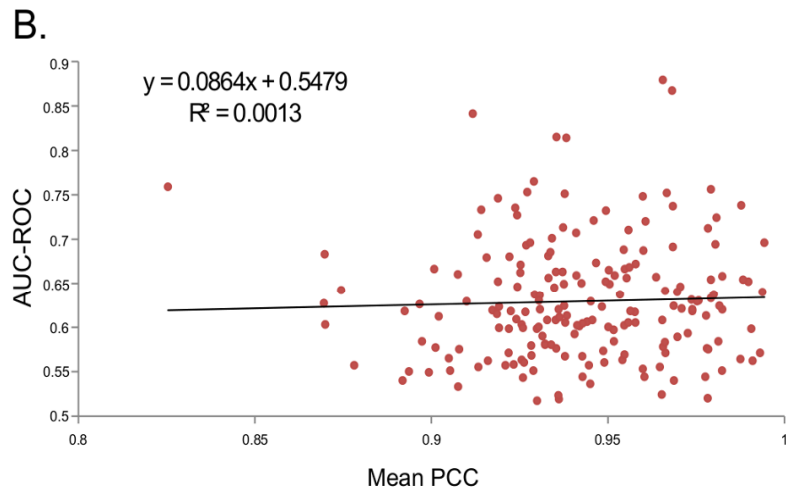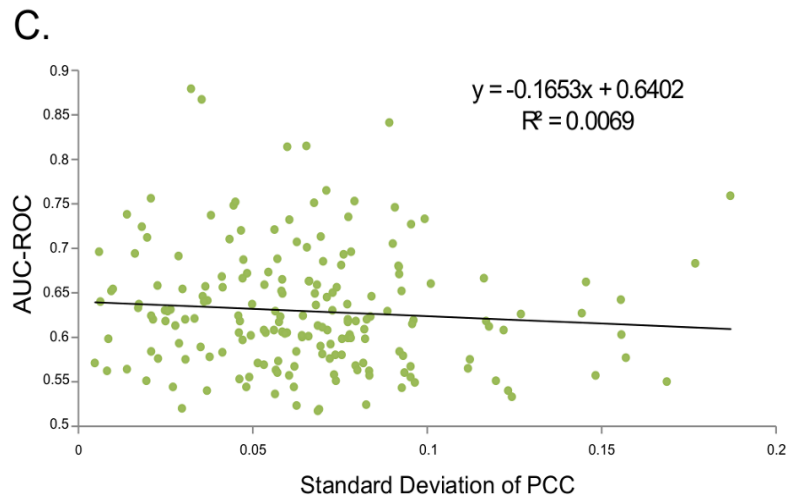

**Figure S6** Regression of the AUC-ROC of phase-expression clusters against cluster size, and Pearson Correlation Coefficient (PCC) of genes in the cluster. (A) Plot of phase-expression cluster size against AUC-ROC. The black line indicates the best linear regression of AUC-ROC against cluster size. The equation is reported above the figure. (B) Plot of the mean PCC amongst genes in each phase-expression cluster against AUC-ROC. The black line indicates the best linear regression of AUC-ROC against mean PCC. The equation is reported above the figure. (C) Plot of the standard deviation of PCC amongst genes in each expression cluster against AUC-ROC. The black line indicates the best linear regression of AUC-ROC against standard deviation of PCC. The equation is reported above the figure.
