# Supplementary material for: Prevalence, Evolution, andcis-Regulation of Diel Transcription inChlamydomonas reinhardtii
Source: Oxford University Press journal article supplement (doi:10.1534/g3.114.015032), 2014-10-29
Supplement: 015032_figures7.pdf [file 015032_figures7.pdf]

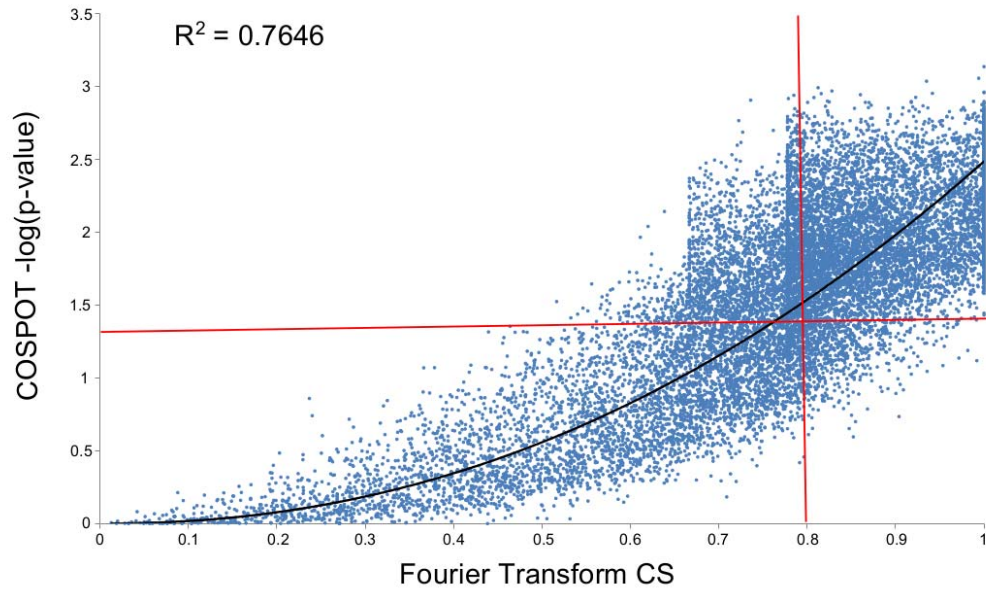

**Figure S7** Distribution of Fourier Transform cyclic score and COSPOT p-values. Plot of Fourier Transform cyclic score (x-axis) against the negative log transform of the COSPOT  $p$ -value (y-axis). The black line is the best fit power-law regression of the transformed COSPOT  $p$ -value against Fourier Transform cyclic score. The red lines indicated the score threshold at a significance level of  $\alpha < 0.02$  for the Fourier Transform cyclic score (vertical) and the transformed COSPOT  $p$ -value (horizontal).
