# Supplementary material for: Prevalence, Evolution, andcis-Regulation of Diel Transcription inChlamydomonas reinhardtii
Source: Oxford University Press journal article supplement (doi:10.1534/g3.114.015032), 2014-10-29
Supplement: 015032_tables1.pdf [file 015032_tables1.pdf]

**Table S1 Fisher's exact test p-values of GO terms with over-represented numbers of *C. reinhardtii* cycling genes**

| GO Term    | adjusted p-value <sup>1</sup> | Description                        |
|------------|-------------------------------|------------------------------------|
| GO:0019861 | 4.38E-28                      | flagellum                          |
| GO:0005929 | 3.07E-11                      | cilium                             |
| GO:0035086 | 4.41E-06                      | axoneme                            |
| GO:0005874 | 1.16E-04                      | microtubule                        |
| GO:0007018 | 4.59E-04                      | microtubule-based movement         |
| GO:0010287 | 4.59E-04                      | regulation of glucose transport    |
| GO:0003777 | 6.53E-04                      | microtubule motor activity         |
| GO:0009765 | 1.19E-03                      | carbohydrate mediated signaling    |
| GO:0022625 | 1.19E-03                      | cytosolic large ribosomal subunit  |
| GO:0006260 | 1.71E-03                      | DNA replication                    |
| GO:0030286 | 1.89E-03                      | dynein complex                     |
| GO:0005886 | 2.16E-03                      | plasma membrane                    |
| GO:0030030 | 6.12E-03                      | cell projection organization       |
| GO:0005794 | 6.52E-03                      | Golgi apparatus                    |
| GO:0042995 | 1.00E-02                      | cell projection                    |
| GO:0005198 | 1.00E-02                      | structural molecule activity       |
| GO:0003774 | 1.00E-02                      | motor activity                     |
| GO:0022627 | 1.00E-02                      | cytosolic small ribosomal subunit  |
| GO:0005774 | 1.42E-02                      | vacuolar membrane                  |
| GO:0009653 | 1.77E-02                      | anatomical structure morphogenesis |
| GO:0009535 | 1.77E-02                      | chloroplast thylakoid membrane     |
| GO:0009637 | 2.20E-02                      | response to blue light             |
| GO:0006364 | 2.20E-02                      | rRNA processing                    |
| GO:0005932 | 2.65E-02                      | microtubule basal body             |
| GO:0009506 | 2.65E-02                      | plasmodesmata                      |
| GO:0004674 | 2.65E-02                      | protein serine/threonine kinase    |
| GO:0005509 | 2.66E-02                      | calcium ion binding                |
| GO:0005488 | 2.75E-02                      | binding                            |
| GO:0030992 | 2.75E-02                      | intraciliary transport particle B  |
| GO:0009507 | 3.12E-02                      | chloroplast                        |
| GO:0010114 | 3.34E-02                      | response to red light              |
| GO:0010218 | 3.34E-02                      | response to far red light          |
| GO:0046686 | 3.79E-02                      | response to cadmium ion            |
| GO:0009523 | 4.16E-02                      | photosystem II                     |
| GO:0048046 | 4.21E-02                      | apoplast                           |
| GO:0006270 | 4.21E-02                      | DNA replication initiation         |
| GO:0009296 | 4.21E-02                      | flagellum assembly                 |
| GO:0010020 | 4.21E-02                      | chloroplast fission                |
| GO:0009434 | 4.21E-02                      | motile cilium                      |

---

|            |          |                                                |
|------------|----------|------------------------------------------------|
| GO:0044430 | 4.21E-02 | cytoskeletal part                              |
| GO:0019253 | 4.21E-02 | reductive pentose-phosphate cycle              |
| GO:0019773 | 4.21E-02 | proteasome core complex, alpha-subunit complex |
| GO:0009826 | 4.21E-02 | unidimensional cell growth                     |
| GO:0004298 | 4.33E-02 | threonine-type endopeptidase activity          |

---

1. Fisher Exact Test  $p$ -value adjusted according to Benjamini-Hochberg
