# Supplementary material for: Prevalence, Evolution, andcis-Regulation of Diel Transcription inChlamydomonas reinhardtii
Source: Oxford University Press journal article supplement (doi:10.1534/g3.114.015032), 2014-10-29
Supplement: 015032_tables2.pdf [file 015032_tables2.pdf]

**Table S2 Descriptions of the GO terms in each of the five broad functional categories**

| <b>Category</b>                          | <b>GO Terms</b>                | <b>Description</b>                                            |
|------------------------------------------|--------------------------------|---------------------------------------------------------------|
| <b>photosynthesis and light response</b> | GO:0015671                     | oxygen transport                                              |
|                                          | GO:0009773                     | photosynthetic electron transport in photosystem I            |
|                                          | GO:0010206                     | photosystem II repair                                         |
|                                          | GO:0009765                     | photosynthesis, light harvesting                              |
|                                          | GO:0015979                     | photosynthesis                                                |
|                                          | GO:0010218                     | response to far red light                                     |
|                                          | GO:0009637                     | response to blue light                                        |
|                                          | GO:0010114                     | response to red light                                         |
|                                          | GO:0010304                     | PSII associated light-harvesting complex II catabolic process |
|                                          | GO:0010020                     | chloroplast fission                                           |
|                                          | GO:0009507                     | chloroplast                                                   |
|                                          | GO:0009579                     | thylakoid                                                     |
|                                          | GO:0009570                     | chloroplast stroma                                            |
|                                          | GO:0009941                     | chloroplast envelope                                          |
|                                          | GO:0009543                     | chloroplast thylakoid lumen                                   |
|                                          | GO:0009523                     | photosystem II                                                |
|                                          | GO:0009522                     | photosystem I                                                 |
|                                          | GO:0009533                     | chloroplast stromal thylakoid                                 |
|                                          | GO:0009534                     | chloroplast thylakoid                                         |
|                                          | GO:0010287                     | plastoglobule                                                 |
| GO:0009535                               | chloroplast thylakoid membrane |                                                               |
| GO:0016168                               | chlorophyll binding            |                                                               |
| <b>cell cycle and mitosis</b>            | GO:0006260                     | DNA replication                                               |
|                                          | GO:0006270                     | DNA replication initiation                                    |
|                                          | GO:0006268                     | DNA unwinding involved in replication                         |
|                                          | GO:0000910                     | cytokinesis                                                   |
|                                          | GO:0000724                     | double-strand break repair via homologous recombination       |
|                                          | GO:0006302                     | double-strand break repair                                    |
|                                          | GO:0007062                     | sister chromatid cohesion                                     |
|                                          | GO:0007067                     | mitosis                                                       |
|                                          | GO:0006259                     | DNA metabolic process                                         |
|                                          | GO:0007049                     | cell cycle                                                    |
|                                          | GO:0051726                     | regulation of cell cycle                                      |

|                                    |            |                                                             |
|------------------------------------|------------|-------------------------------------------------------------|
|                                    | GO:0006281 | DNA repair                                                  |
|                                    | GO:0051301 | cell division                                               |
|                                    | GO:0006310 | DNA recombination                                           |
|                                    | GO:0005819 | spindle                                                     |
|                                    | GO:0005815 | microtubule organizing center                               |
|                                    | GO:0005694 | chromosome                                                  |
|                                    | GO:0004003 | ATP-dependent DNA helicase activity                         |
|                                    | GO:0003887 | DNA-directed DNA polymerase activity                        |
|                                    | GO:0004386 | helicase activity                                           |
| <b>microtubules and flagella</b>   | GO:0000226 | microtubule cytoskeleton organization                       |
|                                    | GO:0007018 | microtubule-based movement                                  |
|                                    | GO:0009296 | flagellum assembly                                          |
|                                    | GO:0030030 | cell projection organization                                |
|                                    | GO:0042384 | cilium assembly                                             |
|                                    | GO:0015630 | microtubule cytoskeleton                                    |
|                                    | GO:0044430 | cytoskeletal part                                           |
|                                    | GO:0019861 | flagellum                                                   |
|                                    | GO:0030286 | dynein complex                                              |
|                                    | GO:0035086 | cilium axoneme                                              |
|                                    | GO:0005813 | centrosome                                                  |
|                                    | GO:0005932 | microtubule basal body                                      |
|                                    | GO:0005874 | microtubule                                                 |
|                                    | GO:0005929 | cilium                                                      |
|                                    | GO:0005856 | cytoskeleton                                                |
|                                    | GO:0005858 | axonemal dynein complex                                     |
|                                    | GO:0035085 | cilium axoneme                                              |
|                                    | GO:0009434 | motile cilium                                               |
|                                    | GO:0030992 | intraflagellar transport particle B                         |
|                                    | GO:0042995 | cell projection                                             |
|                                    | GO:0044463 | cell projection part                                        |
|                                    | GO:0005876 | spindle microtubule                                         |
|                                    | GO:0003777 | microtubule motor activity                                  |
|                                    | GO:0003774 | motor activity                                              |
|                                    | GO:0004835 | tubulin-tyrosine ligase activity                            |
| <b>mitochondria and metabolism</b> | GO:0006096 | glycolysis                                                  |
|                                    | GO:0006122 | mitochondrial electron transport, ubiquinol to cytochrome c |
|                                    | GO:0005983 | starch catabolic process                                    |
|                                    | GO:0006098 | pentose-phosphate shunt                                     |
|                                    | GO:0007005 | mitochondrion organization                                  |

---

|                                 |            |                                                                 |
|---------------------------------|------------|-----------------------------------------------------------------|
|                                 | GO:0006508 | proteolysis                                                     |
|                                 | GO:0015986 | ATP synthesis coupled proton transport                          |
|                                 | GO:0045261 | proton-transporting ATP synthase complex, catalytic core F(1)   |
|                                 | GO:0005750 | mitochondrial respiratory chain complex III                     |
|                                 | GO:0005747 | mitochondrial respiratory chain complex I                       |
|                                 | GO:0005739 | mitochondrion                                                   |
|                                 | GO:0005759 | mitochondrial matrix                                            |
|                                 | GO:0005741 | mitochondrial outer membrane                                    |
|                                 | GO:0005743 | mitochondrial inner membrane                                    |
|                                 | GO:0046933 | proton-transporting ATP synthase activity, rotational mechanism |
|                                 | GO:0046961 | proton-transporting ATPase activity, rotational mechanism       |
| <b>ribosome and translation</b> | GO:0006414 | translational elongation                                        |
|                                 | GO:0006412 | translation                                                     |
|                                 | GO:0022626 | cytosolic ribosome                                              |
|                                 | GO:0022625 | cytosolic large ribosomal subunit                               |
|                                 | GO:0022627 | cytosolic small ribosomal subunit                               |
|                                 | GO:0019843 | rRNA binding                                                    |
|                                 | GO:0003735 | structural constituent of ribosome                              |

---
