# Supplementary material for: Prevalence, Evolution, andcis-Regulation of Diel Transcription inChlamydomonas reinhardtii
Source: Oxford University Press journal article supplement (doi:10.1534/g3.114.015032), 2014-10-29
Supplement: 015032_tables4.pdf [file 015032_tables4.pdf]

**Table S4 “Gold Standard” cycling genes in *C. reinhardtii***

| Gene                     | Name                                         | Reference                        | Locus         | DFT Cyclic Score | COSPOT p-value |
|--------------------------|----------------------------------------------|----------------------------------|---------------|------------------|----------------|
| ATP2/ARF1                | ADP-ribosylation factor                      | MEMON <i>et al.</i> (1995)       | Cre17.g698000 | 0.90             | 1.9e-02        |
| CAH1                     | carbonic anhydrase                           | FUJIWARA <i>et al.</i> (1996)    | Cre04.g223100 | 0.76             | 1.7e-01        |
| CYC4                     | cytochrome c                                 | JACOBSHAGEN <i>et al.</i> (2001) | Cre16.g670950 | 0.78             | 6.2e-01        |
| Cytosolic thioredoxin h1 | Cytosolic thioredoxin h1                     | LEMAIRE <i>et al.</i> (1999)     | Cre09.g391900 | 0.29             | 4.0e-01        |
| FBA1                     | chloroplastic fructose-bisphosphate aldolase | JACOBSHAGEN <i>et al.</i> (2001) | Cre01.g006950 | 0.95             | 1.2e-02        |
| FBA2                     | chloroplastic fructose-bisphosphate aldolase | JACOBSHAGEN <i>et al.</i> (2001) | Cre02.g093450 | 0.83             | 3.4e-02        |
| FBA3                     | chloroplastic fructose-bisphosphate aldolase | JACOBSHAGEN <i>et al.</i> (2001) | Cre05.g234550 | 0.9              | 2.3e-02        |
| FBA4                     | chloroplastic fructose-bisphosphate aldolase | JACOBSHAGEN <i>et al.</i> (2001) | Cre02.g115650 | 0.61             | 1.9e-02        |
| FNR1                     | Ferredoxin NADP reductase                    | LEMAIRE <i>et al.</i> (1999)     | Cre11.g476750 | 0.81             | 2.4e-02        |
| HSP70B                   | 70kd family heat shock protein               | JACOBSHAGEN <i>et al.</i> (2001) | Cre06.250100  | 0.32             | 8.5e-01        |
| LCHII                    | Chlorophyll binding protein                  | JACOBSHAGEN <i>et al.</i> (1996) | Cre06.g283950 | 0.82             | 6.5e-03        |
| PRK1                     | phosphoribulokinase                          | LEMAIRE <i>et al.</i> (1999)     | Cre12.g554800 | 0.99             | 1.0e-02        |
| TUB1                     | Beta-tubulin                                 | JACOBSHAGEN & JOHNSON (1994)     | Cre12.g542250 | 0.67             | 1.1e-02        |
| TUB2                     | Beta-tubulin                                 | JACOBSHAGEN & JOHNSON (1994)     | Cre12.g549550 | 0.98             | 1.1e-02        |
| TufA                     | Elongation factor Tu                         | HWANG <i>et al.</i> (1996)       | Cre06.g259150 | 0.77             | 1.1e-02        |
