# Supplementary material for: Prevalence, Evolution, andcis-Regulation of Diel Transcription inChlamydomonas reinhardtii
Source: Oxford University Press journal article supplement (doi:10.1534/g3.114.015032), 2014-10-29
Supplement: 015032_tables5.pdf [file 015032_tables5.pdf]

**Table S5 Performance COSPOT and DFT on *C. reinhardtii***

| Method and $\alpha$ levels | Genome Coverage <sup>1</sup> | Gold Stand Coverage <sup>2</sup> |
|----------------------------|------------------------------|----------------------------------|
| <b>COSPOT</b>              |                              |                                  |
| $\alpha = 0.01$            | 21.0% (3590)                 | 6.7% (1)                         |
| $\alpha = 0.02$            | 37.4% (6400)                 | 46.7% (7)                        |
| $\alpha = 0.05$            | 54.9% (9392)                 | 73.3% (11)                       |
| <b>DFT</b>                 |                              |                                  |
| $\alpha = 0.01$            | 29.6% (5061)                 | 33.3% (5)                        |
| $\alpha = 0.02$            | 37.6% (6443)                 | 53.3% (8)                        |
| $\alpha = 0.05$            | 55.8% (9556)                 | 73.3% (11)                       |

1. Parentheses indicated the actual number of genes covered

2. Parentheses indicated how many of 15 gold standard genes are identified as cyclic
