# Supplementary material for: Prevalence, Evolution, andcis-Regulation of Diel Transcription inChlamydomonas reinhardtii
Source: Oxford University Press journal article supplement (doi:10.1534/g3.114.015032), 2014-10-29
Supplement: 015032_tables6.pdf [file 015032_tables6.pdf]

**Table S6 Performance of combining COPSOT and DFT on *C. reinhardtii***

| Test<br>P-value | Joint<br>Probability <sup>1</sup> | Overlap <sup>2</sup> | Genome Coverage <sup>3</sup> | Gold Stand Coverage <sup>4</sup> |
|-----------------|-----------------------------------|----------------------|------------------------------|----------------------------------|
| $\alpha = 0.01$ | 0.0134                            | 39.6% (2414)         | 35.7% (6236)                 | 40.0% (6)                        |
| $\alpha = 0.02$ | 0.0272                            | 56.7% (4579)         | 47.2% (8072)                 | 73.3% (11)                       |
| $\alpha = 0.05$ | 0.0734                            | 73.5% (8024)         | 61.7% (10552)                | 86.6% (13)                       |

1. The joint probability of a gene having a score with a p-value of  $\alpha$  in either COPSOT or DFT
2. Parentheses indicated the actual number of genes in the overlap set
3. Parentheses indicated the actual number of genes covered
4. Parentheses indicated how many of 15 gold standard genes are identified as cyclic
