# Supplementary material for: Prevalence, Evolution, and cis-Regulation of Diel Transcription in Chlamydomonas reinhardtii
Source: G3 (Bethesda). 2014 Oct 28;4(12):2461–71. doi: 10.1534/g3.114.015032 (PMC4267941; doi:10.1534/g3.114.015032)
Supplement: Supporting Information [file supp_g3.114.015032_FileS3.xlsx]

## Sheet: Sheet1
File S3: Fisher’s exact test p-values of GO terms with over-represented numbers of C. reinhardtii cycling genes in each phase cluster*
GO Term	ZT 0	ZT 3	ZT 6	ZT 9	ZT 12	Zt 15	ZT 18	ZT 21
GO:0015671	0.0336375	0.554466	0.576563	0.260044	0.468321	0.416955	0.325269	0.314336	oxygen
GO:0007623	0.0475129	0.554466	0.712808	0.640696	0.468321	0.388613	0.415521	0.811835	circadian
GO:0006535	0.0336375	0.221889	0.238905	0.640696	0.225686	0.416955	0.325269	0.684559	cysteine biosynthetic process from serine
GO:0044249	0.0466292	0.554466	0.279991	0.646293	0.468321	0.129973	0.325269	0.684559	cellular
GO:0035556	7.03e-08	0.554466	0.956351	0.995192	0.897826	0.840686	0.622724	0.0884316	intracellular
GO:0009190	0.00116204	0.83018	0.878934	0.995192	0.934417	0.695549	0.461633	0.121192	cyclic
GO:0006182	0.0201076	0.554466	0.746712	0.85749	0.65607	0.605489	0.441994	0.0802335	cGMP
GO:0006629	0.0341165	0.565033	0.491791	0.697647	0.71693	0.42256	0.5015	0.371876	lipid
GO:0006414	0.384605	0.0182978	0.0527291	0.943592	0.759817	0.70797	0.539794	0.749257	translational
GO:0009089	0.392927	0.0182978	0.590041	0.646293	0.476829	0.433171	0.325269	0.686411	lysine biosynthetic process via diaminopimelate
GO:0009738	0.183079	0.0182978	0.590041	0.38221	0.476829	0.433171	0.158683	0.686411	abscisic
GO:0006970	0.183079	0.0182978	0.333107	0.38221	0.476829	0.433171	0.325269	0.686411	response
GO:0019253	0.055431	0.00297135	0.333107	0.646293	0.476829	0.433171	0.325269	0.686411	reductive pentose-phosphate cycle
GO:0009773	0.384605	0.0077469	0.238905	0.640696	0.468321	0.416955	0.325269	0.684559	photosynthetic electron transport in photosystem I
GO:0006412	0.788033	3.74e-09	0.712808	0.999888	0.995196	0.999385	0.777833	0.999999	translation
GO:0010206	0.384605	0.0573396	0.0478736	0.640696	0.468321	0.416955	0.325269	0.684559	photosystem II repair
GO:0009765	0.384605	0.554466	1.01e-09	0.762129	0.759817	0.70797	0.539794	0.927493	photosynthesis,
GO:0015979	0.454524	0.483938	4.19e-05	0.890558	0.858443	0.81517	0.65229	0.975169	photosynthesis
GO:0006096	0.384605	0.565033	0.0100104	0.930047	0.476829	0.686327	0.516494	0.912483	glycolytic
GO:0009624	0.384605	0.695244	0.0478736	0.433761	0.65607	0.605489	0.441994	0.846812	response to nematode
GO:0010218	0.384605	0.744877	2.76e-08	0.303848	0.706374	0.651741	0.485662	0.88751	response to far red light
GO:0009637	0.533628	0.712843	1.01e-09	0.646293	0.666627	0.61925	0.325269	0.858163	response to blue light
GO:0010114	0.384605	0.565033	1.19e-07	0.640696	0.734395	0.686327	0.325269	0.912483	response to red light
GO:0006122	0.384605	0.554466	0.0478736	0.640696	0.468321	0.416955	0.325269	0.684559	mitochondrial electron transport, ubiquinol to cytochrome c
GO:0016558	0.384605	0.554466	0.0100104	0.646293	0.468321	0.42256	0.325269	0.684559	protein
GO:0018298	0.392927	0.565033	6.53e-07	0.646293	0.476829	0.433171	0.325269	0.686411	protein-chromophore linkage
GO:0005983	0.183079	0.565033	0.0201598	0.646293	0.0667712	0.433171	0.325269	0.686411	starch catabolic process
GO:0000381	0.384605	0.554466	0.0478736	0.260044	0.468321	0.120524	0.325269	0.684559	regulation of alternative mRNA splicing, via spliceosome
GO:0006098	0.153241	0.554466	0.0478736	0.260044	0.468321	0.416955	0.325269	0.684559	pentose-phosphate
GO:0009817	0.384605	0.554466	0.0478736	0.260044	0.468321	0.416955	0.325269	0.684559	defense response to fungus, incompatible interaction
GO:0006814	0.384605	0.554466	0.0478736	0.260044	0.468321	0.416955	0.325269	0.314336	sodium
GO:0007005	0.384605	0.554466	0.0100104	0.646293	0.468321	0.42256	0.325269	0.387589	mitochondrion
GO:0010304	0.153241	0.221889	0.0478736	0.260044	0.468321	0.416955	0.325269	0.684559	PSII
GO:0006508	0.587241	0.688588	0.00208901	0.144447	0.976839	0.729538	0.951245	0.846812	proteolysis
GO:0055114	0.582293	0.0182978	0.00151457	0.93495	0.860887	0.999385	0.999797	0.999999	oxidation-reduction
GO:0010043	0.384605	0.554466	0.576563	0.0128308	0.666627	0.61925	0.455097	0.858163	response to zinc ion
GO:0046686	0.837418	0.463272	0.0318717	5.23e-05	0.468321	0.999385	0.814615	0.999999	response to cadmium ion
GO:0045454	0.849236	0.300703	0.238905	0.0238199	0.934417	0.9066	0.325269	0.684559	cell redox homeostasis
GO:0006457	0.557362	0.317661	0.333107	0.0032271	0.822382	0.840686	0.878638	0.999999	protein
GO:0006464	0.523617	0.695244	0.746712	0.0108565	0.65607	0.605489	0.441994	0.245251	cellular
GO:0048856	0.533628	0.554466	0.576563	0.0462959	0.666627	0.0553434	0.455097	0.858163	anatomical
GO:0015986	0.533628	0.217611	0.757399	0.0032271	0.666627	0.61925	0.455097	0.858163	ATP
GO:0009086	0.392927	0.300703	0.590041	0.0426442	0.476829	0.433171	0.325269	0.686411	methionine
GO:0015991	0.523617	0.695244	0.746712	0.0108565	0.0386217	0.605489	0.441994	0.846812	ATP hydrolysis coupled proton transport
GO:0015031	0.44156	0.674775	0.909538	0.0269959	0.34117	0.794847	0.631011	0.846812	protein
GO:0048366	0.533628	0.712843	0.757399	0.0462959	0.292197	0.61925	0.455097	0.572261	leaf
GO:0048316	0.402403	0.574549	0.608091	0.0121277	0.326108	0.45034	0.183033	0.561516	seed
GO:0009846	0.422304	0.594654	0.614464	0.0198562	0.134628	0.463169	0.347268	0.734206	pollen germination
GO:0016126	0.384605	0.554466	0.576563	0.0238199	0.0642664	0.42256	0.325269	0.684559	sterol biosynthetic process
GO:0006888	0.493047	0.674775	0.576563	0.0198562	0.615044	0.570871	0.415521	0.811835	ER
GO:0009735	0.402403	0.574549	0.608091	0.0121277	0.492434	0.45034	0.341511	0.716087	response to cytokinin
GO:0048518	0.392927	0.565033	0.590041	0.0426442	0.476829	0.433171	0.325269	0.686411	positive regulation of biological process
GO:0006886	0.608367	0.964952	0.609906	3.55e-06	0.0667712	0.712571	0.782608	0.968831	intracellular
GO:0006511	0.887336	0.972059	0.91885	2.1e-09	0.835153	0.767716	0.814615	0.979345	ubiquitin-dependent
GO:0016192	0.384605	0.93966	0.825419	3.55e-06	0.468321	0.433171	0.718343	0.923292	vesicle-mediated
GO:0009793	0.600921	0.963716	0.826793	0.308616	0.0435493	0.983073	0.676519	0.999999	embryo
GO:0009555	0.461314	0.695244	0.757124	0.172859	0.0435493	0.416955	0.662226	0.869117	pollen
GO:0000398	0.493047	0.674775	0.712808	0.640696	0.00240638	0.570871	0.415521	0.811835	mRNA
GO:0006260	0.422304	0.650598	0.89462	0.646293	1.25e-09	0.0212039	0.607736	0.962217	DNA
GO:0006396	0.47384	0.911376	0.759918	0.980443	0.0435493	0.254446	0.367007	0.734206	RNA processing
GO:0006270	0.392927	0.565033	0.590041	0.646293	2.15e-07	0.157176	0.325269	0.686411	DNA
GO:0090305	0.384605	0.554466	0.576563	0.640696	0.00249426	0.120524	0.325269	0.684559	nucleic
GO:0006268	0.384605	0.554466	0.279991	0.646293	2.61e-06	0.42256	0.325269	0.684559	DNA unwinding involved in DNA replication
GO:0080147	0.384605	0.554466	0.238905	0.260044	0.0435493	0.120524	0.325269	0.684559	root
GO:0007131	0.384605	0.554466	0.576563	0.260044	0.0435493	0.416955	0.325269	0.684559	reciprocal
GO:0016925	0.384605	0.554466	0.576563	0.308616	0.00596232	0.42256	0.325269	0.684559	protein
GO:0009165	0.384605	0.554466	0.576563	0.640696	0.468321	0.017102	0.325269	0.0717807	nucleotide
GO:0060271	0.384605	0.554466	0.576563	0.646293	0.468321	0.0254856	0.138735	0.0985366	cilium
GO:0000910	0.512444	0.68907	0.736455	0.842651	0.468321	0.00829932	0.433318	0.197629	cytokinesis
GO:0010020	0.392927	0.128398	0.590041	0.646293	0.476829	1.14e-05	0.325269	0.686411	chloroplast fission
GO:0051716	0.402403	0.574549	0.608091	0.433761	0.0978141	0.00815973	0.341511	0.716087	cellular response to stimulus
GO:0000724	0.392927	0.565033	0.590041	0.646293	0.0667712	0.000276768	0.325269	0.686411	double-strand
GO:0006302	0.384605	0.554466	0.576563	0.640696	0.225686	0.017102	0.325269	0.684559	double-strand
GO:0000226	0.392927	0.565033	0.333107	0.646293	0.287851	0.00466513	0.325269	0.482215	microtubule
GO:0045944	0.384605	0.554466	0.576563	0.646293	0.468321	0.0254856	0.138735	0.684559	positive
GO:0007062	0.384605	0.554466	0.576563	0.646293	0.468321	3.4e-06	0.325269	0.684559	sister
GO:0007067	0.392927	0.565033	0.590041	0.646293	0.476829	0.00466513	0.325269	0.686411	mitotic
GO:0006259	0.569444	0.744877	0.590041	0.303848	0.34117	0.0191188	0.485662	0.88751	DNA
GO:0009653	0.23922	0.594654	0.614464	0.225811	0.361408	0.00109607	0.206448	0.734206	anatomical
GO:0010363	0.153241	0.554466	0.576563	0.260044	0.468321	0.017102	0.325269	0.684559	regulation of plant-type hypersensitive response
GO:0040029	0.177736	0.554466	0.576563	0.308616	0.468321	0.00259819	0.325269	0.684559	regulation of gene expression, epigenetic
GO:0009826	0.512444	0.554466	0.576563	0.0837748	0.468321	0.0407461	0.325269	0.684559	unidimensional cell growth
GO:0007049	0.523617	0.695244	0.576563	0.433761	0.468321	0.000184838	0.441994	0.684559	cell
GO:0051726	0.523617	0.554466	0.746712	0.433761	0.468321	0.0110404	0.325269	0.684559	regulation of cell cycle
GO:0009987	0.384605	0.957723	0.614464	0.646293	0.225686	0.0190175	0.860394	0.684559	cellular
GO:0006281	0.76168	0.911376	0.608091	0.308616	0.468321	0.0460496	0.671715	0.979345	DNA
GO:0051301	0.641175	0.819719	0.225023	0.944354	0.77366	0.04498	0.325269	0.684559	cell
GO:0006996	0.442971	0.618662	0.0527291	0.753201	0.542522	0.017102	0.367007	0.684559	organelle
GO:0048513	0.523617	0.695244	0.333164	0.85749	0.468321	1.21e-05	0.441994	0.684559	organ
GO:0009553	0.384605	0.674775	0.712808	0.640696	0.468321	0.0315046	0.415521	0.811835	embryo
GO:0006310	0.47384	0.660321	0.576563	0.79352	0.468321	0.00040827	0.401839	0.804613	DNA
GO:0044260	0.533628	0.618662	0.840764	0.640696	0.716636	0.0315046	0.424531	0.811835	cellular macromolecule metabolic process
GO:0051258	0.512444	0.68907	0.736455	0.842651	0.231088	0.129973	0.0433869	0.839605	protein
GO:0016310	0.183079	0.574549	0.576563	0.930047	0.931074	0.74611	0.0250903	0.846812	phosphorylation
GO:0007018	0.76168	0.911376	0.924972	0.980443	0.468321	0.120524	0.158683	6.22e-11	microtubule-based movement
GO:0006811	0.613106	0.796674	0.609906	0.935735	0.74773	0.695549	0.53068	0.00617092	ion
GO:0006468	0.195732	0.966026	0.826793	0.944354	0.963839	0.433171	0.0084258	0.00245171	protein
GO:0007165	0.195732	0.565033	0.859952	0.966216	0.716636	0.631119	0.373272	0.000115088	signal
GO:0046907	0.384605	0.554466	0.576563	0.0991012	0.468321	0.42256	0.325269	0.0134834	intracellular
GO:0080092	0.23922	0.594654	0.614464	0.490098	0.512547	0.463169	0.347268	0.010442	regulation of pollen tube growth
GO:0009296	0.392927	0.565033	0.590041	0.646293	0.476829	0.433171	0.325269	3.03e-10	flagellum assembly
GO:0070588	0.21959	0.574549	0.608091	0.6872	0.492434	0.45034	0.341511	0.000551862	calcium
GO:0035335	0.512444	0.68907	0.576563	0.842651	0.643363	0.59479	0.138735	0.00245171	peptidyl-tyrosine
GO:0007368	0.442971	0.618662	0.64647	0.753201	0.542522	0.4917	0.0200076	0.00245171	determination
GO:0032402	0.384605	0.554466	0.576563	0.646293	0.468321	0.42256	0.138735	0.0134834	melanosome transport
GO:0070121	0.384605	0.554466	0.576563	0.646293	0.468321	0.42256	0.138735	0.0134834	Kupffer's vesicle development
GO:0030030	0.454524	0.642495	0.66701	0.77111	0.564014	0.0965293	0.3772	2.03e-08	cell
GO:0009953	0.384605	0.554466	0.576563	0.640696	0.468321	0.120524	0.138735	0.00658019	dorsal/ventral
GO:0042384	0.318368	0.642495	0.66701	0.77111	0.564014	0.308466	0.281072	0.00402802	cilium
GO:0005622	0.0014148	0.810499	0.985771	0.725508	0.547978	0.906142	0.425437	0.91338	intracellular
GO:0009507	0.827456	2.58e-10	0.0878152	0.684594	0.606208	0.999662	0.927556	1	chloroplast
GO:0009579	0.811561	0.0149394	0.169895	0.725508	0.880441	0.906142	0.714059	1	thylakoid
GO:0009570	0.51219	0.00314211	0.204683	0.999924	0.999181	0.999662	0.970825	1	chloroplast
GO:0009941	0.51219	1.56e-05	0.00012042	0.684594	0.931732	0.999662	0.998392	1	chloroplast
GO:0009543	0.51219	2.17e-05	0.0567037	0.850395	0.85626	0.873014	0.686969	1	chloroplast thylakoid lumen
GO:0022626	0.560048	0.00192809	0.553258	0.0528275	0.401886	0.926357	0.762613	1	cytosolic
GO:0045261	0.51219	0.0204886	0.578989	0.0376666	0.547978	0.556144	0.425437	0.91338	proton-transporting
GO:0005730	0.996806	2.42e-08	0.942778	0.999924	0.096724	0.556144	0.284101	1	nucleolus
GO:0005618	0.906593	1.56e-05	0.578989	0.524676	0.401886	0.999662	0.927556	1	cell
GO:0022625	0.849211	4.5e-10	0.972517	0.999924	0.908003	0.927324	0.453069	1	cytosolic large ribosomal subunit
GO:0022627	0.817531	4.5e-10	0.578989	0.999924	0.883792	0.906142	0.425437	1	cytosolic
GO:0009523	0.54494	0.148094	2.48e-06	0.825834	0.638402	0.640016	0.453069	0.91338	photosystem
GO:0009522	0.535554	0.629381	8.59e-10	0.79859	0.638402	0.637964	0.451007	1	photosystem
GO:0005750	0.51219	0.560056	0.00532811	0.266692	0.580785	0.556144	0.425437	0.91338	mitochondrial respiratory chain complex III
GO:0009533	0.51219	0.148094	0.0389166	0.210912	0.547978	0.556144	0.425437	0.91338	chloroplast stromal thylakoid
GO:0005747	0.688171	0.560056	0.000294686	0.0960237	0.780366	0.807957	0.585686	1	mitochondrial
GO:0009534	0.398639	0.213984	0.0389166	0.999924	0.812311	0.841514	0.543243	1	chloroplast
GO:0010287	0.255783	0.113863	3.59e-11	0.79859	0.90798	0.926357	0.762613	1	plastoglobule
GO:0005739	0.709025	0.0296885	8.37e-08	0.850395	0.606208	0.999662	0.927556	1	mitochondrion
GO:0009535	0.538944	2.64e-08	9.5e-09	0.999924	0.999181	0.999662	0.821824	1	chloroplast
GO:0005886	0.996806	0.0002268	0.204683	4.05e-06	0.0854396	0.999662	0.970825	1	plasma
GO:0009506	0.871669	0.111575	0.765967	8.21e-05	0.0817016	0.807957	0.748629	1	plasmodesma
GO:0005839	0.51219	0.629381	0.427114	8.95e-05	0.638402	0.637964	0.451007	1	proteasome
GO:0005759	0.179173	0.560056	0.0567037	0.0305852	0.780366	0.807957	0.585686	1	mitochondrial
GO:0005789	0.51219	0.184367	0.201714	0.0305852	0.699549	0.694054	0.491476	1	endoplasmic
GO:0005741	0.51219	0.560056	0.158949	0.00294638	0.547978	0.556144	0.425437	0.91338	mitochondrial
GO:0009505	0.54494	0.648927	0.158473	0.0157592	0.638402	0.640016	0.453069	1	plant-type
GO:0005774	0.535554	0.30697	0.0878152	7.02e-06	0.547978	0.974773	0.937046	1	vacuolar
GO:0005743	0.741801	0.525877	0.112902	0.0298589	0.832243	0.869966	0.656962	1	mitochondrial
GO:0016021	0.709025	0.668876	0.0587445	0.0160471	0.968832	0.999662	0.970825	1	integral
GO:0005773	0.845141	0.0526321	0.578989	0.00026568	0.863001	0.869966	0.891137	1	vacuole
GO:0016020	0.811561	0.148094	0.508635	0.0376666	0.606208	0.873014	0.927556	1	membrane
GO:0000139	0.535554	0.629381	0.427114	0.0497903	0.401886	0.086677	0.451007	0.2643	Golgi
GO:0030126	0.51219	0.560056	0.578989	1.54e-05	0.580785	0.556144	0.425437	0.417487	COPI vesicle coat
GO:0005625	0.535554	0.629381	0.690471	0.0497903	0.638402	0.637964	0.451007	0.2643	soluble fraction
GO:0005819	0.51219	0.560056	0.578989	0.00768383	0.580785	0.127715	0.425437	0.91338	spindle
GO:0030131	0.51219	0.599014	0.620841	0.000181286	0.0559214	0.561714	0.425437	0.91338	clathrin adaptor complex
GO:0005680	0.535554	0.629381	0.690471	0.0497903	0.401886	0.313261	0.451007	1	anaphase-promoting complex
GO:0005635	0.54494	0.648927	0.72599	0.000181286	0.437431	0.640016	0.453069	1	nuclear
GO:0000502	0.51219	0.560056	0.578989	9.09e-05	0.547978	0.556144	0.425437	0.91338	proteasome
GO:0008540	0.51219	0.599014	0.620841	1.31e-05	0.606208	0.561714	0.425437	0.91338	proteasome regulatory particle, base subcomplex
GO:0019773	0.51219	0.596133	0.599938	1.91e-10	0.606208	0.561714	0.425437	0.91338	proteasome core complex, alpha-subunit complex
GO:0005634	0.992172	0.999994	0.999996	2.46e-05	0.0559214	0.537384	0.451007	1	nucleus
GO:0005794	0.962595	0.560056	0.599938	1.21e-06	0.00731219	0.909696	0.927556	1	Golgi
GO:0016023	0.923765	0.727477	0.578989	0.0004779	0.496256	0.873014	0.891137	1	cytoplasmic
GO:0005829	0.898787	0.999994	0.906229	1.65e-09	0.0559214	0.999662	0.927556	1	cytosol
GO:0005783	0.709025	0.897783	0.750821	5.15e-05	0.00731219	0.869966	0.762613	1	endoplasmic
GO:0000325	0.51219	0.560056	0.578989	0.0575426	0.0462007	0.556144	0.425437	0.91338	plant-type
GO:0005732	0.572571	0.676882	0.750821	0.103414	0.0163962	0.461321	0.491476	1	small nucleolar ribonucleoprotein complex
GO:0030529	0.67831	0.76657	0.830101	0.725508	0.0393363	0.556144	0.575624	0.91338	ribonucleoprotein complex
GO:0009705	0.51219	0.560056	0.578989	0.705389	0.0462007	0.556144	0.425437	0.91338	plant-type vacuole membrane
GO:0015030	0.51219	0.560056	0.578989	0.682985	0.0393363	0.103912	0.425437	0.322996	Cajal body
GO:0015630	0.535554	0.629381	0.690471	0.79859	0.0912675	0.0014256	0.451007	0.2643	microtubule
GO:0043232	0.51219	0.247822	0.599938	0.332138	0.606208	0.0366274	0.307128	0.91338	intracellular non-membrane-bounded organelle
GO:0000775	0.51219	0.560056	0.578989	0.705389	0.178907	0.0271299	0.425437	0.91338	chromosome,
GO:0044430	0.51219	0.596133	0.599938	0.332138	0.0559214	0.00026784	0.425437	0.91338	cytoskeletal part
GO:0043234	0.51219	0.560056	0.152422	0.526799	0.780366	0.0234359	0.425437	1	protein complex
GO:0044446	0.71745	0.599014	0.883693	0.991564	0.812311	0.0329308	0.321427	0.91338	intracellular organelle part
GO:0005815	0.535554	0.629381	0.666587	0.780826	0.369335	2.06e-06	0.451007	0.777101	microtubule
GO:0005694	0.572571	0.676882	0.750821	0.682985	0.525032	0.0005616	0.491476	1	chromosome
GO:0019861	0.931034	0.999994	0.999996	0.999924	0.999181	0.999662	0.425437	1.36e-10	flagellum
GO:0030286	0.71745	0.810499	0.883693	0.991564	0.812311	0.863633	0.639384	1.04e-10	dynein complex
GO:0035086	0.730184	0.81801	0.890833	0.991564	0.822918	0.869966	0.644695	1.11e-10	flagellar axoneme
GO:0005813	0.628597	0.727477	0.7872	0.90495	0.758791	0.0470456	0.425437	8.63e-06	centrosome
GO:0005932	0.560048	0.668876	0.748783	0.850395	0.670469	0.103912	0.480178	1.48e-08	basal body
GO:0005874	0.871669	0.954379	0.977939	0.879887	0.606208	0.086677	0.342707	1e-10	microtubule
GO:0005929	0.871669	0.954379	0.977939	0.999924	0.929882	0.561714	0.425437	4.32e-11	cilium
GO:0005856	0.51219	0.803402	0.864878	0.266692	0.795561	0.0261972	0.602046	0.000942545	cytoskeleton
GO:0008287	0.51219	0.560056	0.578989	0.210912	0.547978	0.556144	0.425437	0.00200135	protein serine/threonine phosphatase complex
GO:0005858	0.51219	0.560056	0.578989	0.682985	0.547978	0.556144	0.425437	5.09e-11	axonemal dynein complex
GO:0035085	0.51219	0.560056	0.578989	0.682985	0.547978	0.556144	0.425437	0.00200135	cilium axoneme
GO:0009434	0.51219	0.596133	0.599938	0.725508	0.606208	0.561714	0.425437	7.81e-11	microtubule-based flagellum
GO:0030992	0.51219	0.599014	0.620841	0.734702	0.606208	0.561714	0.425437	1e-10	intraciliary transport particle B
GO:0042995	0.535554	0.629381	0.130811	0.79859	0.638402	0.0192961	0.372208	0.00600859	cell
GO:0044463	0.51219	0.148094	0.578989	0.682985	0.547978	0.103912	0.425437	0.00200135	cell projection part
GO:0005876	0.51219	0.560056	0.578989	0.682985	0.547978	0.103912	0.425437	0.0382059	spindle microtubule
GO:0016849	0.000662235	0.865765	0.884703	0.999898	0.960619	0.720706	0.504946	0.112687	phosphorus-oxygen lyase activity
GO:0004383	0.0114592	0.612418	0.751308	0.87894	0.693962	0.647329	0.499472	0.0731591	guanylate
GO:0070026	0.0265736	0.612418	0.549679	0.698797	0.496477	0.518207	0.35472	0.353415	nitric oxide binding
GO:0019826	0.0265736	0.612418	0.549679	0.698797	0.496477	0.518207	0.35472	0.353415	oxygen sensor activity
GO:0070025	0.0265736	0.612418	0.549679	0.698797	0.496477	0.518207	0.35472	0.353415	carbon monoxide binding
GO:0042803	0.0265736	0.695415	0.237574	0.885899	0.875825	0.584162	0.653946	0.736241	protein
GO:0016301	0.0005406	0.638698	0.72811	0.999898	0.731249	0.869362	0.35472	0.662873	kinase
GO:0051537	0.393958	0.0339867	0.227111	0.751629	0.763368	0.720359	0.546643	0.973914	2 iron, 2 sulfur cluster binding
GO:0019843	0.638149	6.61e-08	0.471424	0.952009	0.514177	0.720706	0.35472	0.973914	rRNA binding
GO:0050661	0.563007	0.0016801	0.549679	0.698897	0.696032	0.660362	0.503832	0.78484	NADP binding
GO:0051287	0.409178	0.0499732	0.19115	0.343194	0.527354	0.741759	0.579844	0.995033	NAD binding
GO:0050660	0.486918	0.0308234	0.580328	0.397637	0.678287	0.518207	0.687487	0.973914	flavin adenine dinucleotide binding
GO:0008266	0.409178	0.0208555	0.561383	0.443704	0.284343	0.530189	0.193783	0.796375	poly(U) RNA binding
GO:0004003	0.393108	0.0490161	0.197059	0.698797	0.496477	0.197977	0.35472	0.752584	ATP-dependent DNA helicase activity
GO:0016619	0.393108	0.0490161	0.197059	0.698797	0.496477	0.518207	0.35472	0.752584	malate dehydrogenase
GO:0003735	0.794021	1.94e-09	0.60817	0.999898	0.998903	0.998603	0.787744	0.999999	structural constituent of ribosome
GO:0016168	0.430669	0.616952	1.08e-08	0.751629	0.546746	0.54551	0.374468	0.799142	chlorophyll binding
GO:0005198	0.5097	0.612418	0.0275735	0.062787	0.696032	0.634393	0.0280883	0.973914	structural molecule activity
GO:0016620	0.409178	0.323152	0.0275735	0.443704	0.514177	0.530189	0.35514	0.796375	oxidoreductase activity, acting on the aldehyde or oxo group of donors, NAD or NADP as acceptor
GO:0008137	0.70585	0.612418	1.03e-06	0.432386	0.863022	0.793625	0.629273	0.99958	NADH dehydrogenase (ubiquinone) activity
GO:0004222	0.638149	0.550746	0.00042983	0.273981	0.777754	0.720706	0.561979	0.973914	metalloendopeptidase
GO:0051082	0.415789	0.498083	0.493912	0.00223792	0.942417	0.558935	0.65241	0.999999	unfolded protein binding
GO:0016874	0.393958	0.612418	0.580328	0.0317587	0.763368	0.720359	0.546643	0.799142	ligase activity
GO:0004298	0.582815	0.768383	0.549679	4.28e-10	0.716677	0.676516	0.511158	0.973914	threonine-type endopeptidase activity
GO:0008270	0.793048	0.695415	0.059927	0.0299052	0.649178	0.916663	0.75282	0.99958	zinc
GO:0005507	0.795796	0.903665	0.197059	0.025627	0.995672	0.981303	0.903941	0.999999	copper
GO:0004791	0.409178	0.0956875	0.561383	0.00565054	0.514177	0.530189	0.35514	0.796375	thioredoxin-disulfide reductase activity
GO:0046933	0.465836	0.225833	0.648926	0.007874	0.378821	0.576719	0.408624	0.86531	proton-transporting ATP synthase activity, rotational mechanism
GO:0008565	0.615267	0.796738	0.561383	0.0018974	0.0992787	0.518207	0.534514	0.973914	protein transporter activity
GO:0046961	0.530573	0.612418	0.728646	0.00135945	0.136208	0.628006	0.485224	0.952982	proton-transporting
GO:0030246	0.409178	0.612418	0.290823	0.0336498	0.284343	0.530189	0.35514	0.796375	carbohydrate binding
GO:0043565	0.408129	0.829758	0.585687	0.0373536	0.514177	0.530189	0.35472	0.799142	sequence-specific DNA binding
GO:0003684	0.430669	0.616952	0.6022	0.0178364	0.323657	0.313601	0.374468	0.799142	damaged DNA binding
GO:0016746	0.430669	0.616952	0.6022	0.0178364	0.323657	0.313601	0.374468	0.799142	transferase activity, transferring acyl groups
GO:0005515	0.582815	0.921381	0.826766	0.0282507	0.460378	0.0338434	0.997628	0.973914	protein
GO:0003887	0.449736	0.637979	0.618756	0.114026	0.00814645	0.358703	0.387323	0.831619	DNA-directed DNA polymerase activity
GO:0010181	0.360378	0.288155	0.728646	0.698797	0.0358543	0.628006	0.485224	0.952982	FMN binding
GO:0003676	0.745566	0.988348	0.831179	0.792921	8.05e-05	0.197977	0.572272	0.999999	nucleic
GO:0004386	0.446881	0.903665	0.549679	0.46261	0.611572	0.00086496	0.649293	0.999999	helicase
GO:0003700	0.694477	0.918885	0.561383	0.698797	0.527354	0.628006	0.0373689	0.952982	sequence-specific
GO:0003713	0.415789	0.612418	0.580328	0.534122	0.527354	0.285351	0.00398295	0.796375	transcription coactivator activity
GO:0004672	0.360378	0.981192	0.549679	0.999898	0.960619	0.903882	0.0306614	0.288229	protein
GO:0005216	0.563007	0.754036	0.549679	0.885899	0.696032	0.518207	0.503832	0.00054855	ion
GO:0003777	0.728487	0.903665	0.910416	0.997855	0.875825	0.269353	0.35514	1.26e-10	microtubule motor activity
GO:0004674	0.151924	0.981192	0.968048	0.997855	0.977022	0.518207	0.00063918	1.29e-05	protein
GO:0004114	0.14889	0.427066	0.907484	0.997855	0.870055	0.558935	0.639574	0.00032436	3',5'-cyclic-nucleotide phosphodiesterase activity
GO:0004683	0.408129	0.272071	0.549679	0.698797	0.496477	0.518207	0.35472	0.0144076	calmodulin-dependent protein kinase activity
GO:0005509	0.393108	0.612418	0.388537	0.828167	0.496477	0.750594	0.35514	0.00032436	calcium ion binding
GO:0003774	0.449736	0.637979	0.618756	0.78103	0.348667	0.558935	0.387323	1.62e-09	motor activity
GO:0004725	0.486918	0.667098	0.496091	0.817228	0.616924	0.592492	0.127198	0.0400163	protein
GO:0004835	0.393108	0.612418	0.549679	0.698797	0.496477	0.197977	0.35472	0.00589286	tubulin-tyrosine ligase activity
*p-value of enrichment adjusted using Benjamini-Hochberg
