# Supplementary material for: Prevalence, Evolution, and cis-Regulation of Diel Transcription in Chlamydomonas reinhardtii
Source: G3 (Bethesda). 2014 Oct 28;4(12):2461–71. doi: 10.1534/g3.114.015032 (PMC4267941; doi:10.1534/g3.114.015032)
Supplement: Supporting Information [file supp_g3.114.015032_FileS4.xlsx]

## Sheet: Sheet1
File S4. Fisher’s exact test p-values of GO terms with over-represented number of A. thaliana cycling genes in phase clusters*
GO Term	ZT 0	ZT 4	ZT 8	ZT 12	ZT 16	ZT 20
GO:0010264	1.0043e-56	1.31547e-08	1	1	1	1	myo-inositol hexakisphosphate biosynthetic process
GO:0015995	2.17241e-19	3.02713e-07	0.751764	1	1	0.441975	chlorophyll
GO:0006355	1.44234e-14	1	1	1	1	1	regulation
GO:0046777	1.51357e-12	1	1	1	0.021799	1.05715e-09	protein
GO:0015996	1.51357e-12	0.20542	0.0275882	0.117813	1	1	chlorophyll
GO:0046982	5.82946e-12	1	1	1	1	0.178274	protein
GO:0015250	5.64471e-11	1	1	1	1	1	water channel activity
GO:0048574	6.78434e-11	1	0.807962	1	1	1	long-day
GO:0009733	3.72483e-09	1	1	1	1	0.0704355	response to auxin
GO:0010218	6.6775e-09	1.88751e-05	1	1	1	0.0650992	response to far red light
GO:0006352	6.6775e-09	1	1	0.51292	1	0.46801	DNA-templated
GO:0006597	6.6775e-09	1	1	1	1	1	spermine biosynthetic process
GO:0006535	1.66604e-08	1	1	1	1	0.208948	cysteine biosynthetic process from serine
GO:0009813	2.76841e-08	1	1	1	1	1	flavonoid
GO:0006417	4.60006e-08	1	1	0.96082	0.212349	1	regulation
GO:0055085	5.48258e-08	1	1	1	1	0.000566717	transmembrane
GO:0006353	8.41365e-08	1	1	1	1	1	DNA-templated
GO:0006749	9.00509e-08	1	1	1	1	1	glutathione metabolic process
GO:0004362	1.18981e-07	1	1	1	1	1	glutathione-disulfide reductase activity
GO:0016602	1.71641e-07	1	1	1	1	1	CCAAT-binding factor complex
GO:0009736	1.99363e-07	1	1	1	1	0.0294749	cytokinin-activated
GO:0009072	2.60936e-07	1	1	1	1	0.923585	aromatic amino acid family metabolic process
GO:0046406	3.6009e-07	1	1	1	1	1	magnesium protoporphyrin IX methyltransferase activity
GO:0006833	4.21636e-07	1	1	0.143147	1	0.0628398	water
GO:0004014	4.45781e-07	1	1	1	1	1	adenosylmethionine decarboxylase activity
GO:0071483	9.72244e-07	1	1	1	1	1	cellular response to blue light
GO:0005215	1.37557e-06	0.976048	1	1	0.319291	1	transporter
GO:0006636	1.37557e-06	0.0388687	1	0.879365	1	0.0482054	unsaturated fatty acid biosynthetic process
GO:0005743	1.46662e-06	1	0.000190156	0.879365	0.557513	0.029842	mitochondrial
GO:0010155	1.86207e-06	0.563068	1	1	0.562782	0.00593057	regulation of proton transport
GO:0008295	1.95873e-06	1	1	0.0115919	1	1	spermidine biosynthetic process
GO:0005992	2.75113e-06	1	1	1	1	0.608694	trehalose biosynthetic process
GO:0045226	2.86644e-06	1	1	1	1	1	extracellular polysaccharide biosynthetic process
GO:0006810	3.0017e-06	1	1	1	0.690773	0.713499	transport
GO:0009744	5.78924e-06	1	1	1	0.192709	0.000545478	response to sucrose
GO:0004124	7.56379e-06	1	1	1	1	0.60023	cysteine synthase activity
GO:0010189	8.16397e-06	0.617304	1	0.108117	1	1	vitamin E biosynthetic process
GO:0006168	8.16397e-06	1	1	1	0.816191	1	adenine salvage
GO:0045116	1.54695e-05	1	1	1	1	1	protein neddylation
GO:0010224	1.79779e-05	1	1	1	1	1	response to UV-B
GO:0003913	1.79779e-05	1	1	1	1	1	DNA photolyase activity
GO:0051090	2.03601e-05	1	1	1	1	1	regulation of sequence-specific DNA binding transcription factor activity
GO:0009637	2.23573e-05	6.09424e-05	1	1	0.816522	0.00697428	response to blue light
GO:0009416	2.66129e-05	1	1	1	1	0.678666	response to light stimulus
GO:0018106	5.25765e-05	1	1	1	1	1	peptidyl-histidine
GO:0000038	5.80614e-05	1	1	1	1	0.232899	very long-chain fatty acid metabolic process
GO:0006733	5.80614e-05	1	1	1	1	0.695828	oxidoreduction coenzyme metabolic process
GO:0044272	5.80614e-05	1	1	1	1	0.695828	sulfur compound biosynthetic process
GO:0009108	5.80614e-05	1	1	1	1	0.695828	coenzyme biosynthetic process
GO:0003700	5.88482e-05	1	1	1	1	1	sequence-specific
GO:0010304	6.61907e-05	1	1	1	1	0.0089415	PSII
GO:0004673	7.21569e-05	1	1	1	1	1	protein
GO:0009106	7.21569e-05	1	1	1	1	0.763818	lipoate metabolic process
GO:0006114	7.69091e-05	0.886299	1	1	1	1	glycerol biosynthetic process
GO:0019419	0.000103872	1	1	1	1	1	sulfate reduction
GO:0000719	0.000103872	1	1	1	0.0701538	1	photoreactive repair
GO:0009117	0.000104645	1	1	1	0.630725	0.290175	nucleotide
GO:0009751	0.00010684	1	1	0.627803	1	0.317881	response to salicylic acid
GO:0071333	0.00010684	1	1	1	1	1	cellular
GO:0016117	0.000122304	1	1	1	1	1	carotenoid biosynthetic process
GO:0009739	0.000125572	1	1	1	1	0.00285981	response to gibberellin
GO:0019288	0.000145878	0.617304	0.671615	0.0281844	0.0036465	1	isopentenyl
GO:0045893	0.000183927	1	1	1	1	1	positive
GO:0008654	0.000191644	1	1	1	1	1	phospholipid biosynthetic process
GO:0031408	0.0002228	1	1	1	1	1	oxylipin biosynthetic process
GO:0000096	0.000241355	1	1	1	0.370404	1	sulfur
GO:0010236	0.000272188	1	1	1	1	1	plastoquinone biosynthetic process
GO:0006839	0.000388848	1	1	1	0.416009	1	mitochondrial
GO:0005770	0.000397273	1	1	1	1	0.713499	late
GO:0018298	0.000420682	1	1	1	1	1	protein-chromophore linkage
GO:0015994	0.000456171	0.165587	1	1	1	1	chlorophyll metabolic process
GO:0000156	0.000565065	1	1	1	1	0.812509	phosphorelay response regulator activity
GO:0004096	0.000633996	1	0.00171707	1	1	1	catalase activity
GO:0005681	0.00100589	1	1	1	1	1	spliceosomal complex
GO:0009965	0.00101217	1	1	0.293263	1	1	leaf
GO:0005384	0.00112405	1	1	1	1	1	manganese ion transmembrane transporter activity
GO:0010115	0.00114394	1	1	1	1	1	regulation of abscisic acid biosynthetic process
GO:0030154	0.00114394	1	1	0.0472182	0.199228	1	cell
GO:0016119	0.00114394	1	1	1	1	0.43891	carotene metabolic process
GO:0031146	0.00125537	1	1	1	1	1	SCF-dependent proteasomal ubiquitin-dependent protein catabolic process
GO:0009737	0.00182256	1	0.0052307	0.0901536	1	0.43891	response to abscisic acid
GO:0042548	0.00204618	1	1	1	1	1	regulation of photosynthesis, light reaction
GO:0015205	0.00204618	1	1	1	1	1	nucleobase transmembrane transporter activity
GO:2000121	0.00204618	1	1	1	1	1	regulation of removal of superoxide radicals
GO:0005980	0.00204618	1	1	1	1	1	glycogen
GO:0045014	0.00204618	1	1	1	1	1	negative regulation of transcription by glucose
GO:0050311	0.00204618	1	1	1	1	1	sulfite reductase (ferredoxin) activity
GO:0016560	0.00204618	1	1	1	1	1	protein import into peroxisome matrix, docking
GO:0003868	0.00204618	1	1	1	1	1	4-hydroxyphenylpyruvate dioxygenase activity
GO:0004838	0.00223435	1	1	1	1	1	L-tyrosine
GO:0042398	0.00257055	1	1	1	1	0.0806381	cellular modified amino acid biosynthetic process
GO:0010205	0.00282039	1	0.807962	1	1	1	photoinhibition
GO:0009926	0.00313842	1	1	1	1	0.396633	auxin polar transport
GO:0016844	0.00350983	1	1	0.143147	0.53447	1	strictosidine synthase activity
GO:0003999	0.00351171	1	1	1	0.0113815	1	adenine phosphoribosyltransferase activity
GO:0010277	0.0039641	1	1	1	1	1	chlorophyllide a oxygenase [overall] activity
GO:0009868	0.0039641	1	1	1	1	1	jasmonic acid and ethylene-dependent systemic resistance, jasmonic acid mediated signaling pathway
GO:0019358	0.0039641	1	1	1	1	1	nicotinate nucleotide salvage
GO:0008883	0.0039641	1	1	1	1	0.60023	glutamyl-tRNA reductase activity
GO:0042335	0.00475463	1	1	1	1	1	cuticle
GO:0009850	0.00584456	1	1	1	0.0652002	1	auxin metabolic process
GO:0030140	0.00584456	1	1	0.715138	1	1	trans-Golgi
GO:0010315	0.0061756	1	1	1	1	1	auxin
GO:0008831	0.00662505	1	0.545753	1	1	1	dTDP-4-dehydrorhamnose reductase activity
GO:0050347	0.00670521	1	1	1	1	1	trans-octaprenyltranstransferase activity
GO:0009821	0.0090681	0.992192	1	0.293392	1	1	alkaloid biosynthetic process
GO:0009753	0.00936174	1	1	0.746544	1	1	response to jasmonic acid
GO:2001141	0.0102688	1	1	0.0159284	1	0.805539	regulation
GO:0045723	0.0102688	1	0.0183854	1	1	1	positive regulation of fatty acid biosynthetic process
GO:0008361	0.0109317	1	1	1	1	0.232899	regulation of cell size
GO:0009585	0.0126106	1	1	1	1	0.154096	red,
GO:0010017	0.0152024	1	0.0609154	1	1	0.259189	red
GO:0019216	0.0152024	1	1	1	1	1	regulation of lipid metabolic process
GO:0006766	0.0160199	1	1	1	1	1	vitamin
GO:0009723	0.0171194	1	1	1	1	1	response to ethylene
GO:0008360	0.0210529	1	1	0.766897	1	1	regulation of cell shape
GO:0016668	0.0210529	1	1	1	1	1	oxidoreductase activity, acting on a sulfur group of donors, NAD(P) as acceptor
GO:0050307	0.0210529	1	1	1	1	1	sucrose-phosphate phosphatase activity
GO:0031304	0.0210529	1	1	1	1	1	intrinsic
GO:0016780	0.0210529	1	1	1	1	1	phosphotransferase activity, for other substituted phosphate groups
GO:0005986	0.0248721	1	1	1	1	1	sucrose biosynthetic process
GO:0031537	0.0265066	1	0.495164	1	1	0.805539	regulation of anthocyanin metabolic process
GO:0010279	0.0267667	1	1	1	1	1	indole-3-acetic acid amido synthetase activity
GO:0010042	0.0267667	1	1	1	1	1	response to manganese ion
GO:0046556	0.0267667	1	1	1	1	1	alpha-L-arabinofuranosidase activity
GO:0061077	0.0267667	1	1	0.03411	1	1	chaperone-mediated protein folding
GO:0010291	0.0267667	1	1	1	1	0.43891	carotene beta-ring hydroxylase activity
GO:0010252	0.027897	1	1	1	1	1	auxin homeostasis
GO:0004871	0.0293558	1	1	1	1	1	signal transducer activity
GO:0019748	0.0295796	1	1	1	1	0.815776	secondary
GO:0043224	0.0350271	1	1	1	1	1	nuclear SCF ubiquitin ligase complex
GO:0042762	0.0350271	1	1	1	1	1	regulation of sulfur metabolic process
GO:0032942	0.0350271	1	1	1	1	1	inositol tetrakisphosphate 2-kinase activity
GO:1901601	0.0350271	1	1	1	1	1	strigolactone biosynthetic process
GO:0009661	0.0350271	1	1	1	1	1	chromoplast organization
GO:0047652	0.0350271	1	1	1	1	1	allantoate deiminase activity
GO:0004604	0.0350271	1	1	1	1	1	phosphoadenylyl-sulfate reductase (thioredoxin) activity
GO:0008734	0.0350271	1	1	1	1	1	L-aspartate oxidase activity
GO:0006827	0.0350271	1	1	1	1	1	high-affinity iron ion transmembrane transport
GO:0051453	0.0350271	1	1	1	1	1	regulation of intracellular pH
GO:0010241	0.0350271	1	1	1	1	1	ent-kaurene oxidation to kaurenoic acid
GO:1901183	0.0350271	1	1	1	1	1	positive regulation of camalexin biosynthetic process
GO:0019379	0.0350271	1	1	1	1	1	sulfate assimilation, phosphoadenylyl sulfate reduction by phosphoadenylyl-sulfate reductase (thioredoxin)
GO:0004419	0.0350271	1	1	1	1	1	hydroxymethylglutaryl-CoA lyase activity
GO:0071421	0.0350271	1	1	1	1	1	manganese
GO:0032947	0.0350271	1	1	1	1	1	protein complex scaffold
GO:0003904	0.0350271	1	1	1	1	1	deoxyribodipyrimidine photo-lyase activity
GO:0016002	0.0350271	1	1	1	1	1	sulfite reductase activity
GO:0051188	0.0350271	1	1	1	1	1	cofactor biosynthetic process
GO:0045550	0.0350271	1	1	1	1	1	geranylgeranyl reductase activity
GO:0043100	0.0350271	1	1	1	1	1	pyrimidine nucleobase salvage
GO:0046459	0.0350271	1	1	1	1	1	short-chain fatty acid metabolic process
GO:1901918	0.0350271	1	1	1	1	1	negative regulation of exoribonuclease activity
GO:0016120	0.0350271	1	1	1	1	1	carotene
GO:0006896	0.0350271	1	1	0.93464	1	1	Golgi to vacuole transport
GO:0004563	0.0383417	1	1	0.37763	1	1	beta-N-acetylhexosaminidase activity
GO:0009535	2.88468e-30	0	9.10397e-07	1	1.76553e-56	1.49576e-15	chloroplast
GO:0010287	0.00410535	7.82603e-85	1	0.000182825	0.197551	1	plastoglobule
GO:0009534	2.08057e-06	2.90249e-78	0.590116	1	0.00240704	1	chloroplast
GO:0009765	1	3.15178e-73	0.37556	1	0.0201275	1	photosynthesis,
GO:0015979	0.343725	3.11617e-51	1	1	1	1	photosynthesis
GO:0009941	1.96355e-06	8.62351e-38	0.00492243	9.6156e-35	1.46015e-24	2.1457e-11	chloroplast
GO:0016168	1	2.88468e-24	1	1	1	1	chlorophyll binding
GO:0019684	0.0547968	1.22272e-19	1	0.143147	1	0.60023	photosynthesis,
GO:0009522	1	1.99257e-19	0.0302086	1	1	1	photosystem
GO:0004349	1	8.49864e-19	1	1	1	1	glutamate 5-kinase activity
GO:0004072	1	2.39055e-18	0.277513	1	1	1	aspartate kinase activity
GO:0009579	0.328814	1.31084e-17	1	0.0790281	2.1368e-07	0.233778	thylakoid
GO:0006561	1	4.50254e-16	1	1	1	1	proline biosynthetic process
GO:0030076	1	8.33352e-15	1	1	1	1	light-harvesting complex
GO:0035304	2.73949e-06	2.66098e-14	0.330027	3.76314e-09	1	1	regulation of protein dephosphorylation
GO:0009067	1	2.90668e-13	0.0893638	1	1	1	aspartate family amino acid biosynthetic process
GO:0019344	1.79779e-05	5.46071e-13	0.00615873	1	0.0201275	4.87457e-06	cysteine
GO:0009773	1.64974e-06	3.90809e-12	1	1	0.0289988	0.030603	photosynthetic electron transport in photosystem I
GO:0009538	1	9.99717e-12	0.0069875	1	1	1	photosystem I reaction center
GO:0006415	1	2.78713e-09	1	1	5.342e-09	1	translational
GO:0004350	1	7.54044e-08	1	1	1	1	glutamate-5-semialdehyde dehydrogenase activity
GO:0010207	9.31034e-05	4.78938e-07	1	1	0.021927	0.0665749	photosystem II assembly
GO:0016620	1	4.78938e-07	1	1	1	1	oxidoreductase activity, acting on the aldehyde or oxo group of donors, NAD or NADP as acceptor
GO:0030003	0.446708	2.31487e-06	0.44567	0.220851	0.557513	0.0650992	cellular cation homeostasis
GO:0010114	1.75523e-05	2.49868e-06	1	1	1	0.0311976	response to red light
GO:0008909	1	3.32206e-06	0.0813665	1	1	1	isochorismate synthase activity
GO:0009768	1	3.46421e-06	1	1	1	0.512725	photosynthesis, light harvesting in photosystem I
GO:0009540	1	4.11478e-06	1	1	1	1	zeaxanthin epoxidase [overall] activity
GO:0004639	1	4.11478e-06	1	1	1	1	phosphoribosylaminoimidazolesuccinocarboxamide synthase activity
GO:0009783	1	4.11478e-06	1	1	1	1	photosystem II antenna complex
GO:0048529	1	4.11478e-06	1	1	1	1	magnesium-protoporphyrin IX monomethyl ester (oxidative) cyclase activity
GO:0009657	0.000216318	9.92277e-06	0.728373	1	0.00378535	0.000428602	plastid
GO:0009769	1	9.98042e-06	1	1	1	1	photosynthesis, light harvesting in photosystem II
GO:0009740	0.00295381	1.43725e-05	1	1	1	0.227903	gibberellic
GO:0070838	0.175874	1.61502e-05	0.668916	0.0606089	0.263388	0.00893604	divalent metal ion transport
GO:0009686	0.872321	1.74829e-05	1	1	1	1	gibberellin
GO:0042651	1	2.97294e-05	1	1	1	1	thylakoid
GO:0016020	6.50367e-05	4.21677e-05	0.185915	0.493941	0.000698417	0.0667805	membrane
GO:0004853	1	4.66312e-05	0.322196	1	1	1	uroporphyrinogen decarboxylase activity
GO:0009517	1	0.000105772	1	1	1	1	PSII
GO:0008652	0.0386409	0.000124647	0.471499	1	0.508626	0.60023	cellular amino acid biosynthetic process
GO:0045544	1	0.000196216	1	1	1	1	gibberellin 20-oxidase activity
GO:0005943	1	0.000217637	1	1	1	1	1-phosphatidylinositol-4-phosphate 3-kinase, class IA complex
GO:0004602	1	0.000265157	1	0.108117	0.178944	0.647443	glutathione peroxidase activity
GO:0004044	1	0.000319583	1	1	1	1	amidophosphoribosyltransferase activity
GO:0004310	0.000367027	0.000319583	1	1	1	1	farnesyl-diphosphate farnesyltransferase activity
GO:0009688	1	0.000618935	1	1	1	1	abscisic
GO:0010347	1	0.000790435	1	1	1	1	L-galactose-1-phosphate phosphatase activity
GO:0000148	1	0.00498874	1	1	0.0421742	1	1,3-beta-D-glucan synthase complex
GO:0006075	1	0.00737864	1	1	0.0590053	1	(1->3)-beta-D-glucan
GO:0042372	1	0.00937226	0.169398	1	1	1	phylloquinone biosynthetic process
GO:0004412	1	0.00937226	0.447422	1	1	1	homoserine dehydrogenase activity
GO:0010007	1	0.00937226	1	1	1	1	magnesium chelatase complex
GO:0009976	1	0.0116367	1	1	1	1	tocopherol cyclase activity
GO:0022619	1	0.0116367	1	1	1	1	generative cell differentiation
GO:1901695	1	0.0116367	1	1	1	1	tyramine biosynthetic process
GO:0017126	1	0.0116367	1	1	1	1	nucleologenesis
GO:1901401	1	0.0116367	1	1	1	1	regulation of tetrapyrrole metabolic process
GO:0010444	1	0.0116367	1	1	1	1	guard mother cell differentiation
GO:0051783	1	0.0116367	1	1	1	1	regulation of nuclear division
GO:0019593	1	0.0116367	1	1	1	1	mannitol biosynthetic process
GO:0000439	1	0.0116367	1	1	1	1	core
GO:0009800	1	0.0116367	1	1	1	1	cinnamic acid biosynthetic process
GO:0030794	1	0.0116367	1	1	1	1	(S)-coclaurine-N-methyltransferase activity
GO:0042550	1	0.0118077	0.10913	1	1	1	photosystem I stabilization
GO:0016831	1	0.0138441	1	1	1	1	carboxy-lyase activity
GO:0008610	0.0795373	0.0138564	1	1	1	1	lipid
GO:0004519	1	0.0153244	1	1	1	1	endonuclease activity
GO:0016621	1	0.015526	1	1	1	1	cinnamoyl-CoA reductase activity
GO:0016851	1	0.015526	1	1	1	1	magnesium chelatase activity
GO:0019656	1	0.0272759	1	1	1	0.327445	glucose catabolic process to D-lactate and ethanol
GO:0046939	1	0.0276442	1	1	1	1	nucleotide
GO:0004837	1	0.0303307	1	0.93464	1	1	tyrosine decarboxylase activity
GO:0009553	1	0.0362209	0.151368	1	1	1	embryo
GO:0001676	1	0.0362209	1	0.291058	1	1	long-chain
GO:0006828	0.859609	0.0405361	1	1	1	1	manganese ion transport
GO:0009533	1	0.0422769	1	1	0.150936	0.805539	chloroplast stromal thylakoid
GO:0010025	0.778897	0.0444744	1	1	1	1	wax biosynthetic process
GO:0043433	0.260296	0.0467384	1	1	1	1	negative regulation of sequence-specific DNA binding transcription factor activity
GO:0048354	1	0.0467384	1	1	1	1	mucilage biosynthetic process involved in seed coat development
GO:0031365	1	0.0467384	0.322196	1	0.119503	1	N-terminal protein amino acid modification
GO:0022626	1	1	1.68807e-224	1	1	1	cytosolic
GO:0006412	1	1	8.94785e-169	0.00087872	0.614351	1	translation
GO:0001510	1	1	3.22301e-122	1	1	1	RNA
GO:0009220	1	1	3.63256e-117	0.000168723	1	1	pyrimidine ribonucleotide biosynthetic process
GO:0005730	1	1	1.2714e-92	0.110361	1	1	nucleolus
GO:0006626	1	1	1.27318e-65	1.59018e-09	1	1	protein
GO:0022625	1	1	4.89175e-61	1	1	1	cytosolic large ribosomal subunit
GO:0022627	1	1	1.70276e-48	1	1	1	cytosolic
GO:0003735	1	1	1.09214e-46	0.189966	1	1	structural constituent of ribosome
GO:0005840	1	1	2.3024e-42	0.115965	1	1	ribosome
GO:0006260	1	1	1.35978e-41	1	1	1	DNA
GO:0019761	1	1	2.89803e-36	0.454943	0.000913559	0.464872	glucosinolate
GO:0006164	1	5.42213e-12	2.46554e-31	1	1	1	purine nucleotide biosynthetic process
GO:0006606	1	1	9.43753e-29	1	1	1	protein
GO:0034968	1	1	1.42231e-28	1	1	1	histone
GO:0009165	1	1	8.67289e-28	1	1	1	nucleotide
GO:0009409	0.000638717	0.0660208	1.12463e-23	6.92137e-17	0.00073867	0.389735	response to cold
GO:0006270	1	1	1.42364e-23	1	1	1	DNA
GO:0006364	0.893974	9.92277e-06	2.02742e-23	1	0.121765	0.526092	rRNA
GO:0006261	1	1	8.11013e-23	1	1	1	DNA-dependent
GO:0000478	1	1	3.60004e-19	1	1	1	endonucleolytic cleavage involved in rRNA processing
GO:0005759	1	1	2.53745e-16	0.211541	1	1	mitochondrial
GO:0006275	1	1	5.8121e-16	1	1	1	regulation of DNA replication
GO:0051567	1	1	1.76081e-15	1	1	1	histone
GO:0090309	1	1	1.05257e-14	1	1	1	positive regulation of methylation-dependent chromatin silencing
GO:0042254	1	1	8.14655e-13	1	1	1	ribosome
GO:0009098	1	1	3.05783e-12	1	1	1	leucine biosynthetic process
GO:0006269	1	1	3.81063e-12	1	1	1	DNA
GO:0009414	0.790929	0.176276	3.84279e-12	3.38577e-06	1	1	response to water deprivation
GO:0003899	1	1	7.94622e-12	1	1	1	DNA-directed RNA polymerase activity
GO:0010388	1	1	2.98524e-11	1	1	1	cullin deneddylation
GO:0010424	1	1	9.63086e-11	1	1	1	DNA methylation on cytosine within a CG sequence
GO:0005622	1	1	1.57292e-10	1	1	1	intracellular
GO:0009684	1	1	1.79029e-10	0.0462614	0.0318687	1	indoleacetic acid biosynthetic process
GO:0005737	1	1	3.4723e-10	1	1	0.189504	cytoplasm
GO:0009560	1	1	4.30031e-10	0.269796	1	1	embryo
GO:0004748	1	1	1.78895e-09	1	1	1	ribonucleoside-diphosphate reductase activity, thioredoxin disulfide as acceptor
GO:0009186	1	1	1.78895e-09	1	1	1	deoxyribonucleoside diphosphate metabolic process
GO:0006127	1	1	1.78895e-09	1	1	1	glycerophosphate shuttle
GO:0009864	1	1	3.04737e-09	1	1	1	induced systemic resistance, jasmonic acid mediated signaling pathway
GO:0006413	1	1	5.73684e-09	1	1	1	translational
GO:0006422	1	1	1.39801e-08	1	1	1	aspartyl-tRNA aminoacylation
GO:0006406	1	1	1.70276e-08	1	1	1	mRNA
GO:0044267	1	1	3.04167e-08	0.000382843	1	0.60023	cellular
GO:0006351	1	1	3.2052e-08	1	0.000884769	1	transcription,
GO:0006268	1	1	5.22678e-08	1	1	1	DNA unwinding involved in DNA replication
GO:0004765	1	1	8.44641e-08	1	1	0.0821418	shikimate kinase activity
GO:0004134	1	1	8.66591e-08	2.65215e-05	1	1	4-alpha-glucanotransferase activity
GO:0008283	1	1	1.17524e-07	0.425673	1	1	cell
GO:0009631	1	1	2.34864e-07	0.0340489	1	1	cold acclimation
GO:0006072	1	1	3.03604e-07	1	1	1	glycerol-3-phosphate metabolic process
GO:0010439	1	1	3.03604e-07	1	0.919108	1	regulation of glucosinolate biosynthetic process
GO:0009269	0.289697	1	3.65183e-07	0.00213025	0.00398172	1	response to desiccation
GO:0004020	1	1	5.05821e-07	1	1	1	adenylylsulfate kinase activity
GO:0003862	1	1	5.05821e-07	1	1	1	3-isopropylmalate dehydrogenase activity
GO:0009415	1	1	5.13654e-07	1	1	1	response to water
GO:0005971	1	1	5.82906e-07	1	1	1	ribonucleoside-diphosphate reductase complex
GO:0004645	1	1	5.82906e-07	1	1	1	phosphorylase activity
GO:0042393	1	1	7.10718e-07	1	1	1	histone binding
GO:0009331	1	1	8.39457e-07	1	1	1	glycerol-3-phosphate dehydrogenase complex
GO:0000790	1	1	2.28519e-06	1	1	1	nuclear
GO:0008033	0.84287	1	2.37097e-06	1	1	1	tRNA processing
GO:0030093	1	0.00139782	3.51147e-06	1	1	1	chloroplast photosystem I
GO:0008612	1	1	7.90894e-06	1	1	1	peptidyl-lysine modification to peptidyl-hypusine
GO:0004641	1	1	1.15058e-05	1	1	1	phosphoribosylformylglycinamidine cyclo-ligase activity
GO:0006306	1	1	1.25774e-05	1	1	1	DNA
GO:0006177	1	1	1.28208e-05	1	1	1	GMP
GO:0009073	0.693694	1	1.35858e-05	1	0.557513	1	aromatic amino acid family biosynthetic process
GO:0003723	1	1	1.96946e-05	1	1	1	RNA binding
GO:0009536	1	1	1.96946e-05	0.000264473	1	1	plastid
GO:0016570	1	1	2.28135e-05	1	1	1	histone
GO:0042991	1	1	2.28135e-05	1	1	1	transcription
GO:0006432	1	1	2.77538e-05	1	1	1	phenylalanyl-tRNA aminoacylation
GO:0005758	1	1	2.77538e-05	1	0.319291	1	mitochondrial
GO:0010286	1	1	3.102e-05	0.232155	1	1	heat acclimation
GO:0015934	1	1	3.17519e-05	0.00716994	0.0260833	1	large ribosomal subunit
GO:0003896	1	1	3.29423e-05	1	1	1	DNA primase activity
GO:0051287	1	1	4.02118e-05	0.0318144	0.901678	0.515005	NAD binding
GO:0042631	1	0.0025484	6.90976e-05	1	1	0.0417007	cellular response to water deprivation
GO:0046168	1	1	7.61519e-05	1	1	1	glycerol-3-phosphate catabolic process
GO:0019760	1	1	7.61519e-05	0.683248	0.890928	1	glucosinolate metabolic process
GO:0045039	1	1	8.013e-05	0.885355	1	1	protein import into mitochondrial inner membrane
GO:0006479	1	1	8.013e-05	0.0230028	1	1	protein
GO:0004435	0.260296	1	8.48111e-05	1	1	1	phosphatidylinositol phospholipase C activity
GO:0009640	1	1	0.000127554	1	1	1	photomorphogenesis
GO:0051726	1	1	0.000136518	1	1	1	regulation of cell cycle
GO:0006569	1	1	0.000155452	0.00845809	0.00190786	1	tryptophan
GO:0009909	1	1	0.000190156	1	1	1	regulation of flower development
GO:0009927	1	1	0.000190156	1	1	0.434632	histidine phosphotransfer kinase activity
GO:0030337	1	1	0.000190156	1	1	1	DNA polymerase processivity factor activity
GO:1900865	1	1	0.000190156	1	1	1	chloroplast RNA modification
GO:0008685	1	1	0.000190156	1	1	1	2-C-methyl-D-erythritol 2,4-cyclodiphosphate synthase activity
GO:0006543	1	1	0.000190156	1	1	1	glutamine catabolic process
GO:0070409	1	1	0.000190156	1	1	1	carbamoyl phosphate biosynthetic process
GO:0006983	1	1	0.000190156	1	1	1	ER overload response
GO:0019948	1	1	0.000257645	1	1	1	SUMO activating enzyme activity
GO:0032776	1	1	0.000257645	1	1	1	DNA methylation on cytosine
GO:0009316	1	1	0.000257645	1	1	1	3-isopropylmalate dehydratase complex
GO:0015935	1	1	0.000282564	1	1	1	small ribosomal subunit
GO:0000103	1	1	0.000333991	1	1	1	sulfate assimilation
GO:0004152	1	1	0.00082599	1	1	1	dihydroorotate dehydrogenase activity
GO:0080103	1	1	0.00082599	1	1	1	4-methylthiopropyl glucosinolate S-oxygenase activity
GO:0003849	1	1	0.00082599	1	0.0318687	1	3-deoxy-7-phosphoheptulonate synthase activity
GO:0005618	1	1	0.00082801	0.0230028	1	0.259189	cell
GO:0006400	1	1	0.000891805	1	0.103454	1	tRNA modification
GO:0016458	1	1	0.000937039	1	1	1	gene silencing
GO:0042719	1	1	0.00113302	1	1	1	mitochondrial intermembrane space protein transporter complex
GO:0006407	1	1	0.00113302	1	1	1	rRNA export from nucleus
GO:0000741	1	0.385765	0.00167098	1	1	1	karyogamy
GO:0080008	1	1	0.00218307	1	1	1	Cul4-RING E3 ubiquitin ligase complex
GO:0003994	1	1	0.0022072	0.293263	1	1	aconitate
GO:0006101	1	1	0.0022072	0.293263	1	1	citrate metabolic process
GO:0006995	0.952708	1	0.00232172	0.0333573	0.473	1	cellular
GO:0004629	0.952708	1	0.00236343	1	1	1	phospholipase
GO:0008026	1	1	0.00245411	1	1	1	ATP-dependent helicase activity
GO:0008276	1	1	0.00246128	0.702825	1	1	protein methyltransferase activity
GO:0008168	1	1	0.00294005	0.0119983	1	1	methyltransferase activity
GO:0015450	1	1	0.00300004	0.0926707	1	1	P-P-bond-hydrolysis-driven protein transmembrane transporter activity
GO:0006469	1	1	0.00303761	1	1	1	negative
GO:0004643	1	1	0.00303761	1	1	1	phosphoribosylaminoimidazolecarboxamide formyltransferase activity
GO:0036290	1	1	0.00303761	1	1	1	protein trans-autophosphorylation
GO:0043036	1	1	0.00303761	1	1	1	starch grain
GO:0016274	1	1	0.00303761	1	1	1	protein-arginine N-methyltransferase activity
GO:0004368	1	1	0.00303761	1	1	1	glycerol-3-phosphate dehydrogenase activity
GO:0031508	1	1	0.00303761	1	1	1	pericentric heterochromatin assembly
GO:0009780	1	1	0.00303761	1	1	1	photosynthetic NADP+ reduction
GO:0005639	1	1	0.00303761	1	1	1	integral component of nuclear inner membrane
GO:0003922	1	1	0.00303761	1	1	1	GMP synthase (glutamine-hydrolyzing) activity
GO:0000012	1	1	0.00303761	1	1	1	single strand break repair
GO:0003937	1	1	0.00303761	1	1	1	IMP cyclohydrolase activity
GO:0006541	1	1	0.00303761	1	1	1	glutamine metabolic process
GO:0005834	1	1	0.00303761	1	1	0.271022	heterotrimeric G-protein complex
GO:0004649	1	1	0.0041636	1	1	1	poly(ADP-ribose) glycohydrolase activity
GO:0016746	0.729745	1	0.00540523	1	0.507588	1	transferase activity, transferring acyl groups
GO:0004556	0.777484	1	0.00540523	1	1	1	alpha-amylase
GO:0004605	1	1	0.00562099	1	1	1	phosphatidate cytidylyltransferase activity
GO:0010498	1	1	0.00590274	0.201769	1	0.422156	proteasomal protein catabolic process
GO:0006655	1	1	0.00676169	1	0.990622	1	phosphatidylglycerol biosynthetic process
GO:0005666	1	1	0.00727854	1	1	1	DNA-directed RNA polymerase III complex
GO:0019563	1	1	0.00727854	1	1	1	glycerol catabolic process
GO:0042276	1	1	0.00727854	1	1	1	error-prone translesion synthesis
GO:0009423	1	1	0.00727854	1	0.264773	1	chorismate biosynthetic process
GO:0043447	1	1	0.00727854	1	1	0.60023	alkane biosynthetic process
GO:0004367	1	1	0.00749827	1	1	1	glycerol-3-phosphate
GO:0051604	1	1	0.00749827	1	1	1	protein maturation
GO:0080107	1	1	0.0122807	1	1	1	8-methylthiopropyl glucosinolate S-oxygenase activity
GO:0005635	1	1	0.0129636	1	1	0.805539	nuclear
GO:0010389	1	1	0.0132792	1	1	1	regulation of G2/M transition of mitotic cell cycle
GO:0046914	1	0.886299	0.0148238	1	1	1	transition metal ion binding
GO:0030259	1	1	0.0148238	1	1	1	lipid glycosylation
GO:0019156	1	1	0.0183854	0.605437	1	1	isoamylase activity
GO:0080036	1	1	0.0183854	1	1	0.805539	regulation of cytokinin-activated signaling pathway
GO:0009787	1	1	0.0183854	0.605437	1	1	regulation of abscisic acid-activated signaling pathway
GO:0000175	1	1	0.0188548	1	1	1	3'-5'-exoribonuclease activity
GO:0016616	1	1	0.0207152	0.11254	1	1	oxidoreductase activity, acting on the CH-OH group of donors, NAD or NADP as acceptor
GO:0030515	1	1	0.022388	1	1	1	snoRNA binding
GO:0004815	1	1	0.022388	1	1	1	aspartate-tRNA ligase activity
GO:0004729	1	1	0.022388	1	1	0.333975	oxygen-dependent protoporphyrinogen oxidase activity
GO:0042023	1	1	0.0258584	1	1	1	DNA
GO:0009664	0.729745	1	0.0271277	1	1	1	plant-type cell wall organization
GO:0003743	1	1	0.0272018	1	1	1	translation initiation factor activity
GO:0043424	1	1	0.0330155	1	0.752394	0.251962	protein histidine kinase binding
GO:0006207	1	1	0.0364812	0.766897	1	1	'de novo' pyrimidine nucleobase biosynthetic process
GO:0000028	1	1	0.0364812	1	1	1	ribosomal
GO:0000188	1	1	0.0364812	1	1	1	inactivation
GO:0043405	1	1	0.0364812	1	1	1	regulation of MAP kinase activity
GO:0010107	1	1	0.0364812	0.766897	1	0.0693323	potassium ion import
GO:0070734	1	1	0.0364812	1	1	0.0693323	histone
GO:0000412	1	1	0.0364812	1	1	0.0693323	histone peptidyl-prolyl isomerization
GO:0009250	0.729745	1	0.0364812	0.766897	1	1	glucan
GO:0009788	1	1	0.0384059	1	1	1	negative regulation of abscisic acid-activated signaling pathway
GO:0004300	1	1	0.0390511	1	1	1	enoyl-CoA hydratase activity
GO:0000774	1	1	0.0390511	1	1	1	adenyl-nucleotide exchange factor activity
GO:0007010	1	1	0.0398818	1	1	0.328522	cytoskeleton organization
GO:0005544	1	1	0.0413847	1	0.990622	1	calcium-dependent phospholipid binding
GO:0080123	1	1	0.0413847	1	1	1	jasmonate-amino synthetase activity
GO:0033506	1	1	0.0413847	1	1	1	glucosinolate biosynthetic process from homomethionine
GO:0042425	1	1	0.0413847	1	1	1	choline biosynthetic process
GO:0051246	1	1	0.0413847	1	1	1	regulation of protein metabolic process
GO:0000957	1	1	0.0413847	1	1	1	mitochondrial
GO:0052573	1	1	0.0413847	1	1	1	UDP-D-galactose metabolic process
GO:0060968	1	1	0.0413847	1	1	1	regulation of gene silencing
GO:0004635	1	1	0.0413847	1	1	1	phosphoribosyl-AMP cyclohydrolase activity
GO:0019211	1	1	0.0413847	1	1	1	phosphatase activator activity
GO:0004056	1	1	0.0413847	1	1	1	argininosuccinate lyase activity
GO:0004170	1	1	0.0413847	1	1	1	dUTP
GO:0004636	1	1	0.0413847	1	1	1	phosphoribosyl-ATP diphosphatase activity
GO:0009394	1	1	0.0413847	1	1	1	2'-deoxyribonucleotide metabolic process
GO:0000469	1	1	0.0413847	1	1	1	cleavage involved in rRNA processing
GO:0080105	1	1	0.0413847	1	1	1	6-methylthiopropyl glucosinolate S-oxygenase activity
GO:0006105	1	1	0.0413847	1	1	1	succinate metabolic process
GO:0008618	1	1	0.0413847	1	1	1	7-methylguanosine metabolic process
GO:0008853	1	1	0.0413847	1	1	1	exodeoxyribonuclease III activity
GO:0051743	1	1	0.0413847	1	1	1	red chlorophyll catabolite reductase activity
GO:0046185	1	1	0.0413847	1	1	1	aldehyde catabolic process
GO:0043601	1	1	0.0413847	1	1	1	nuclear
GO:0009202	1	1	0.0413847	1	1	1	deoxyribonucleoside triphosphate biosynthetic process
GO:0009448	1	1	0.0413847	1	1	1	gamma-aminobutyric acid metabolic process
GO:0000307	1	1	0.0413847	1	1	1	cyclin-dependent protein kinase holoenzyme complex
GO:0046080	1	1	0.0413847	1	1	1	dUTP metabolic process
GO:0043626	1	1	0.0413847	1	1	1	PCNA complex
GO:0010219	1	1	0.0413847	1	1	1	regulation of vernalization response
GO:0051512	1	1	0.0413847	1	1	1	positive regulation of unidimensional cell growth
GO:0046398	1	1	0.0413847	1	1	1	UDP-glucuronate metabolic process
GO:0010376	1	1	0.0413847	1	1	1	stomatal complex formation
GO:0009259	1	1	0.0413847	1	1	1	ribonucleotide metabolic process
GO:0080180	1	1	0.0413847	1	1	1	2-methylguanosine metabolic process
GO:0003867	1	1	0.0413847	1	1	1	4-aminobutyrate
GO:0009968	1	1	0.0413847	1	1	1	negative regulation of signal transduction
GO:0004073	1	1	0.0413847	1	1	1	aspartate-semialdehyde dehydrogenase activity
GO:0010322	1	1	0.0413847	1	1	1	regulation of isopentenyl diphosphate biosynthetic process, methylerythritol 4-phosphate pathway
GO:0019484	1	1	0.0413847	1	1	1	beta-alanine catabolic process
GO:0019843	1	1	0.0494726	1	0.265534	1	rRNA binding
GO:0051087	1	1	0.0494726	1	1	1	chaperone binding
GO:0009570	1	1	9.27219e-29	2.16351e-90	1.97654e-76	8.39983e-08	chloroplast
GO:0009507	0.00215554	1.01284e-58	4.30031e-10	5.26187e-66	2.30469e-22	2.56149e-09	chloroplast
GO:0009627	1	1	1	5.78717e-49	1.23534e-21	1	systemic
GO:0009862	1	1	0.0813665	1.3168e-43	6.99316e-09	1	systemic acquired resistance, salicylic acid mediated signaling pathway
GO:0034976	1	1	0.000367493	2.12612e-40	0.000713539	1	response to endoplasmic reticulum stress
GO:0006457	1	1	4.30328e-24	2.1368e-35	0.0611585	1	protein
GO:0006334	1	1	2.2024e-07	3.19852e-27	1	1	nucleosome assembly
GO:0009697	1	1	1	1.59726e-24	7.07815e-17	1	salicylic acid biosynthetic process
GO:0019252	1	1	2.46056e-11	8.45007e-24	3.13842e-06	1	starch
GO:0042742	0.845222	1	1	9.83818e-24	1.69609e-10	1.75752e-07	defense response to bacterium
GO:0005774	1	1	2.50496e-06	3.41888e-23	1.28208e-18	0.0013607	vacuolar
GO:0006612	1	1	1	1.20958e-22	4.65941e-09	0.00697428	protein targeting to membrane
GO:0010310	1	0.659951	0.232639	1.84121e-22	0.00446591	1	regulation of hydrogen peroxide metabolic process
GO:0010363	1	1	1	2.02328e-22	5.342e-09	0.0204273	regulation of plant-type hypersensitive response
GO:0005983	1	1	0.323972	4.14791e-22	1	1	starch catabolic process
GO:0009706	1	2.69237e-08	1	6.35104e-21	1	0.090491	chloroplast
GO:0005739	1	1	0.00246128	2.92404e-20	1	1	mitochondrion
GO:0009867	1	1	1	4.38044e-19	0.0168261	1	jasmonic acid mediated signaling pathway
GO:0000023	1	1	7.84863e-08	1.7247e-17	1.79368e-07	1	maltose metabolic process
GO:0050832	1	1	1	4.58926e-17	1.67027e-10	1	defense response to fungus
GO:0016853	1	1	1	9.45979e-17	1	1	isomerase
GO:0005829	1	1	3.08649e-09	2.01352e-16	0.999166	1	cytosol
GO:0005779	1	1	0.0162462	2.01352e-16	1	1	integral component of peroxisomal membrane
GO:0005773	1	1	0.44567	5.30243e-16	2.16556e-15	0.00232261	vacuole
GO:0016559	1	1	1	6.46764e-16	0.890928	0.436247	peroxisome fission
GO:0005783	1	1	0.200355	9.74454e-16	0.0112601	1	endoplasmic
GO:0009651	3.8844e-12	0.883662	5.32581e-07	4.01512e-15	0.284629	2.06787e-07	response to salt stress
GO:0046686	1	1	0.119623	4.01512e-15	0.000898427	0.0654873	response to cadmium ion
GO:0009814	1	1	1	6.97799e-14	0.206069	0.0650992	defense response, incompatible interaction
GO:0000165	1	1	0.488547	1.81304e-13	0.238975	1	MAPK
GO:0031348	1	1	0.595808	2.16822e-13	0.00026928	1	negative regulation of defense response
GO:0034263	1	1	1	4.22781e-12	1	1	autophagy in response to ER overload
GO:0005787	1	1	1	8.85882e-12	0.150936	1	signal peptidase complex
GO:0006465	1	1	1	2.93088e-11	0.000100311	1	signal peptide processing
GO:0009695	0.775715	1	1	5.00461e-11	1	1	jasmonic acid biosynthetic process
GO:0009595	1	1	1	1.87655e-10	0.0753522	1	detection of biotic stimulus
GO:0005982	1	1	0.325434	3.23191e-10	1	1	starch metabolic process
GO:0004594	1	1	1	6.28011e-10	1	1	pantothenate kinase activity
GO:0043900	1	1	1	6.69022e-10	0.128741	1	regulation of multi-organism process
GO:0006333	1	1	0.804304	3.60585e-09	1	1	chromatin
GO:0042026	1	1	4.82186e-06	4.77296e-09	1	1	protein refolding
GO:0006970	0.000758219	1	1	5.3079e-09	1	0.26824	response
GO:0031357	1	1	0.0107017	7.5567e-09	1	1	integral component of chloroplast inner membrane
GO:0007623	1.27496e-08	0.0362209	0.11658	8.4831e-09	1	0.512725	circadian
GO:0006662	1	1	1	8.4831e-09	1	0.130146	glycerol ether metabolic process
GO:0031347	1	1	1	2.97476e-08	0.00296295	1	regulation of defense response
GO:0004514	1	1	1	3.3593e-08	1	1	nicotinate-nucleotide diphosphorylase (carboxylating) activity
GO:0000786	1	1	0.0314002	5.07994e-08	1	1	nucleosome
GO:0071482	7.06788e-05	1	1	7.93386e-08	1	0.302829	cellular response to light stimulus
GO:0006096	1	0.0222915	0.196309	8.91628e-08	0.00595793	0.116341	glycolytic
GO:0009408	1	1	1.48813e-07	1.46202e-07	1	1	response to heat
GO:0015035	1	1	1	1.65786e-07	1	0.233778	protein disulfide oxidoreductase activity
GO:0006423	1	1	1	1.98288e-07	1	1	cysteinyl-tRNA aminoacylation
GO:0045088	1	1	1	2.1279e-07	0.923154	1	regulation of innate immune response
GO:0017183	1	1	1	2.17183e-07	1	1	peptidyl-diphthamide biosynthetic process from peptidyl-histidine
GO:0010309	1	1	1	4.62125e-07	1	1	acireductone dioxygenase [iron(II)-requiring] activity
GO:0052033	1	1	1	5.05821e-07	1	1	pathogen-associated molecular pattern dependent induction by symbiont of host innate immune response
GO:0050521	1	1	1	6.0057e-07	1	1	alpha-glucan, water dikinase activity
GO:0000169	1	1	1	6.0057e-07	1	1	activation
GO:0005788	1	1	1	6.34661e-07	1	1	endoplasmic
GO:0006189	1	1	0.218445	8.64147e-07	1	0.382599	'de novo' IMP biosynthetic process
GO:0072593	1	1	1	1.92002e-06	0.206938	1	reactive oxygen species metabolic process
GO:0006972	1	0.924755	1	2.20548e-06	0.286719	0.325939	hyperosmotic response
GO:0009435	4.87457e-05	1	1	3.67262e-06	1	0.251962	NAD biosynthetic process
GO:0005763	1	1	1	6.80744e-06	1	1	mitochondrial small ribosomal subunit
GO:0007030	0.175874	1	1	6.80744e-06	1	0.0650992	Golgi organization
GO:0009658	0.0904101	1	0.892036	8.90333e-06	0.454133	1	chloroplast
GO:0003755	1	1	1	9.62966e-06	0.00466258	1	peptidyl-prolyl cis-trans isomerase activity
GO:0051903	1	1	1	1.13602e-05	1	1	S-(hydroxymethyl)glutathione dehydrogenase activity
GO:0046423	1	1	1	1.13602e-05	1	1	allene-oxide cyclase activity
GO:0030272	1	1	1	1.13602e-05	1	1	5-formyltetrahydrofolate cyclo-ligase activity
GO:0004413	1	1	1	1.28208e-05	1	1	homoserine kinase activity
GO:0006979	1	0.049409	1	1.35199e-05	1	0.550792	response to oxidative stress
GO:0045454	0.0178695	1	1	1.71986e-05	0.383151	0.469789	cell redox homeostasis
GO:0019363	1	1	1	2.65215e-05	1	1	pyridine nucleotide biosynthetic process
GO:0043069	1	1	1	3.17414e-05	0.000918824	1	negative regulation of programmed cell death
GO:0072661	1	1	1	3.40783e-05	1	1	protein targeting to plasma membrane
GO:0019432	1	1	1	4.39364e-05	1	0.805539	triglyceride
GO:0044237	1	1	1	4.39364e-05	0.33393	1	cellular
GO:0006099	1	1	1	5.27671e-05	0.569494	1	tricarboxylic acid cycle
GO:0004345	0.446708	1	1	6.57477e-05	0.222121	0.805539	glucose-6-phosphate dehydrogenase activity
GO:0000815	1	1	1	8.24032e-05	1	1	ESCRT III complex
GO:0016226	1	1	0.888611	8.24032e-05	0.0880495	1	iron-sulfur cluster assembly
GO:0004834	1	1	1	8.65966e-05	0.63514	1	tryptophan synthase activity
GO:0042542	1	1	0.0125123	0.000114074	1	1	response to hydrogen peroxide
GO:0004630	1	1	1	0.000133275	1	1	phospholipase D activity
GO:0009506	1	1	0.414499	0.000139001	0.284095	0.0909757	plasmodesma
GO:0006108	1	1	1	0.000146905	1	0.512725	malate metabolic process
GO:0009508	1	1	0.0162462	0.000170735	1	1	plastid chromosome
GO:0006184	1	1	1	0.000178931	1	0.441975	GTP
GO:0030245	1	1	1	0.000179004	1	1	cellulose catabolic process
GO:0009569	1	1	1	0.000179004	1	1	chloroplast starch grain
GO:0004615	1	1	1	0.000179004	1	1	phosphomannomutase activity
GO:0032211	1	1	1	0.000179004	1	1	negative regulation of telomere maintenance via telomerase
GO:0043547	1	1	1	0.000179004	1	1	positive
GO:0004592	1	1	1	0.000179004	1	1	pantoate-beta-alanine ligase activity
GO:0051752	1	1	1	0.000179004	1	1	phosphoglucan, water dikinase activity
GO:0046506	1	1	1	0.000179004	1	1	sulfolipid biosynthetic process
GO:0031564	1	1	1	0.000179004	1	1	transcription
GO:0050515	1	1	1	0.000179004	1	1	4-(cytidine 5'-diphospho)-2-C-methyl-D-erythritol kinase activity
GO:0046292	1	1	1	0.000179004	1	1	formaldehyde metabolic process
GO:0006006	0.871846	1	1	0.000180699	0.501437	0.314707	glucose
GO:0004708	1	1	1	0.000192221	1	1	MAP
GO:0031307	1	1	0.587847	0.000207342	1	1	integral component of mitochondrial outer membrane
GO:0046938	1	1	1	0.000242616	1	1	phytochelatin biosynthetic process
GO:0009088	1	1	0.000257645	0.000242616	1	1	threonine biosynthetic process
GO:0006564	1	1	1	0.000247233	0.00103459	1	L-serine biosynthetic process
GO:0008061	1	1	1	0.000293593	1	1	chitin binding
GO:0006783	1	1	1	0.00030975	1	0.815776	heme
GO:0016157	1	1	1	0.000338042	1	1	sucrose synthase activity
GO:0016998	1	1	1	0.00042063	1	0.0519253	cell wall macromolecule catabolic process
GO:0004462	1	1	1	0.000429864	0.203769	1	lactoylglutathione lyase activity
GO:0003756	1	1	1	0.000455519	1	1	protein disulfide isomerase activity
GO:0045087	1	1	1	0.000558855	0.000913559	1	innate
GO:0003824	0.446708	1	0.568624	0.000583134	1	0.964082	catalytic
GO:0009532	1	1	1	0.000706911	1	1	plastid
GO:0004012	1	1	0.397401	0.000787653	1	1	phospholipid-translocating ATPase activity
GO:0005851	1	1	0.397401	0.000787653	1	1	eukaryotic translation initiation factor 2B complex
GO:0042787	1	1	1	0.000787653	1	1	protein ubiquitination involved in ubiquitin-dependent protein catabolic process
GO:0004550	1	1	1	0.000787653	1	1	nucleoside diphosphate kinase activity
GO:0051258	1	1	1	0.00098385	1	1	protein
GO:0004601	1	1	1	0.00107985	1	1	peroxidase
GO:0009617	1	1	0.255621	0.00125783	1	1	response
GO:0004396	1	1	1	0.00132421	1	1	hexokinase activity
GO:0009644	1	0.144885	0.0183854	0.00135776	1	1	response to high light intensity
GO:0018401	1	1	1	0.00148102	0.793196	1	peptidyl-proline hydroxylation to 4-hydroxy-L-proline
GO:0009051	0.984207	1	1	0.00148186	0.692182	1	pentose-phosphate shunt, oxidative branch
GO:0005674	1	1	1	0.00182518	1	1	transcription factor TFIIF complex
GO:0071258	1	1	1	0.00182518	1	1	cellular response to gravity
GO:0004109	1	1	1	0.00182518	1	1	coproporphyrinogen oxidase activity
GO:0000025	1	1	0.322196	0.00182518	1	1	maltose catabolic process
GO:0004856	1	1	0.322196	0.00182518	1	1	xylulokinase activity
GO:0004648	1	1	0.322196	0.00182518	1	1	O-phospho-L-serine
GO:0042344	1	1	0.322196	0.00182518	1	1	indole glucosinolate catabolic process
GO:0004576	1	1	1	0.00182518	1	1	oligosaccharyl transferase activity
GO:0042781	1	1	1	0.00182518	1	1	3'-tRNA processing endoribonuclease activity
GO:0010020	1	1	1	0.00192244	1	1	chloroplast fission
GO:0005507	1	1	1	0.00192718	1	1	copper
GO:0042644	0.382323	1	0.00236343	0.00194983	0.150936	1	chloroplast
GO:0030176	1	0.0422769	1	0.00194983	0.150936	1	integral
GO:0005198	1	1	1	0.00205053	0.238626	0.015033	structural molecule activity
GO:0016756	1	1	1	0.00205106	1	1	glutathione gamma-glutamylcysteinyltransferase activity
GO:0050662	1	0.387493	1	0.00215634	1	1	coenzyme binding
GO:0009620	1	1	1	0.00220479	1	1	response
GO:0006399	1	1	0.00275349	0.00225587	1	1	tRNA metabolic process
GO:0042794	1	1	1	0.00262547	1	1	rRNA transcription from plastid promoter
GO:0004491	1	1	1	0.00262547	1	1	methylmalonate-semialdehyde dehydrogenase (acylating) activity
GO:0003949	1	1	1	0.00262547	1	1	1-(5-phosphoribosyl)-5-[(5-phosphoribosylamino)methylideneamino]imidazole-4-carboxamide isomerase activity
GO:0015693	1	1	1	0.00262547	1	1	magnesium
GO:0004638	1	1	1	0.00262547	1	1	phosphoribosylaminoimidazole carboxylase activity
GO:0008837	1	1	1	0.00262547	1	1	diaminopimelate
GO:0032491	1	1	1	0.00262547	1	1	detection of molecule of fungal origin
GO:0004164	1	1	1	0.00262547	1	1	diphthine synthase activity
GO:0003980	1	1	1	0.00262547	1	1	UDP-glucose
GO:0004399	1	1	1	0.00262547	1	1	histidinol dehydrogenase activity
GO:0042819	1	1	1	0.00262573	1	1	vitamin B6 biosynthetic process
GO:0045037	1	1	1	0.00279705	1	1	protein import into chloroplast stroma
GO:0016629	1	1	1	0.00356219	1	1	12-oxophytodienoate reductase activity
GO:0009749	1	1	1	0.00377585	0.314366	0.563158	response to glucose
GO:0004144	1	1	1	0.00390268	1	1	diacylglycerol O-acyltransferase activity
GO:0009789	1	1	1	0.00419108	1	1	positive regulation of abscisic acid-activated signaling pathway
GO:0016688	1	1	1	0.00467082	1	1	L-ascorbate peroxidase activity
GO:0031425	1	1	1	0.00486139	1	1	chloroplast RNA processing
GO:0009266	1	1	1	0.00626904	0.239808	0.419107	response to temperature stimulus
GO:0019199	1	1	0.590331	0.00644754	1	1	transmembrane receptor protein kinase activity
GO:0009526	0.450924	1	0.00727854	0.00644754	1	1	plastid
GO:0004325	1	1	1	0.00647828	1	1	ferrochelatase
GO:0016763	1	1	1	0.00647828	1	1	transferase activity, transferring pentosyl groups
GO:0042780	1	1	0.447422	0.00647828	1	1	tRNA 3'-end processing
GO:0009295	1	1	0.138828	0.00845809	1	1	nucleoid
GO:0005216	0.322579	1	1	0.00861875	0.711062	0.95169	ion
GO:0045252	1	1	1	0.00889252	1	1	oxoglutarate dehydrogenase complex
GO:0004149	1	1	1	0.00889252	1	1	dihydrolipoyllysine-residue succinyltransferase activity
GO:0003924	1	1	1	0.00889252	1	0.48837	GTPase
GO:0008233	1	1	1	0.00937309	0.277275	0.815776	peptidase
GO:0006520	1	0.0746607	0.230879	0.0110425	1	0.333975	cellular
GO:0004743	1	1	0.127055	0.0122858	1	1	pyruvate kinase activity
GO:0001666	1	1	1	0.012456	1	1	response to hypoxia
GO:0008138	1	1	1	0.013304	1	0.767963	protein tyrosine/serine/threonine phosphatase activity
GO:0016272	1	1	1	0.0140903	1	1	prefoldin complex
GO:0005509	1	1	0.261607	0.0144215	0.105815	1	calcium ion binding
GO:0046520	1	1	1	0.0152847	1	1	sphingoid biosynthetic process
GO:0006071	1	0.356898	0.643602	0.0152847	1	0.382599	glycerol metabolic process
GO:0004817	1	1	1	0.0159284	1	1	cysteine-tRNA ligase activity
GO:0000105	1	1	1	0.0190948	0.128603	1	histidine biosynthetic process
GO:0006094	1	1	0.321344	0.0192165	0.711062	0.630653	gluconeogenesis
GO:0003988	1	1	1	0.0194634	1	1	acetyl-CoA C-acyltransferase activity
GO:0003987	1	1	1	0.0194634	1	1	acetate-CoA ligase activity
GO:0004795	1	1	0.255073	0.0194634	1	1	threonine synthase activity
GO:0032875	1	0.886299	1	0.0200356	1	1	regulation of DNA endoreduplication
GO:0008898	1	1	0.728373	0.0230028	1	1	S-adenosylmethionine-homocysteine
GO:0004623	1	1	1	0.0230028	1	1	phospholipase
GO:0030433	1	1	1	0.0230028	1	1	ER-associated ubiquitin-dependent protein catabolic process
GO:0003840	0.129778	1	1	0.0230028	1	1	gamma-glutamyltransferase activity
GO:0004869	1	1	1	0.0269271	1	1	cysteine-type endopeptidase inhibitor activity
GO:0008519	1	1	1	0.0269271	1	1	ammonium transmembrane transporter activity
GO:0006540	1	1	0.791673	0.0322898	1	1	glutamate decarboxylation to succinate
GO:0042793	1	1	0.0381316	0.0337875	1	1	transcription
GO:0004476	1	1	1	0.03411	1	1	mannose-6-phosphate isomerase activity
GO:0005460	1	1	1	0.03411	1	1	UDP-glucose transmembrane transporter activity
GO:0006517	1	1	1	0.03411	1	1	protein deglycosylation
GO:0031201	1	1	1	0.03411	1	1	SNARE complex
GO:0000963	1	1	0.0390511	0.03411	1	1	mitochondrial RNA processing
GO:0003857	1	1	0.322196	0.03411	1	1	3-hydroxyacyl-CoA dehydrogenase activity
GO:0046872	1	1	1	0.0351626	0.530133	1	metal
GO:0003697	1	1	0.138828	0.0355758	1	1	single-stranded DNA binding
GO:0008889	1	1	1	0.0355758	1	1	glycerophosphodiester phosphodiesterase activity
GO:0006069	1	1	1	0.0355758	1	1	ethanol oxidation
GO:0019307	1	1	1	0.0355758	1	1	mannose biosynthetic process
GO:0004644	1	1	1	0.0355758	1	1	phosphoribosylglycinamide formyltransferase activity
GO:0000070	1	1	1	0.0355758	1	1	mitotic
GO:0010478	1	1	1	0.0355758	1	1	chlororespiration
GO:0046473	1	1	1	0.0355758	1	1	phosphatidic acid metabolic process
GO:0033528	1	1	1	0.0355758	1	1	S-methylmethionine cycle
GO:0022821	1	1	1	0.0355758	1	1	potassium ion antiporter activity
GO:0034089	1	1	1	0.0355758	1	1	establishment of meiotic sister chromatid cohesion
GO:0015165	1	1	1	0.0355758	1	1	pyrimidine nucleotide-sugar transmembrane transporter activity
GO:0033862	1	1	1	0.0355758	1	1	UMP kinase activity
GO:0090322	1	1	1	0.0355758	1	1	regulation of superoxide metabolic process
GO:0006849	1	1	1	0.0355758	1	1	plasma membrane pyruvate transport
GO:0043495	1	1	1	0.0355758	1	1	protein anchor
GO:0010111	1	1	1	0.0355758	1	1	glyoxysome organization
GO:0004777	1	1	1	0.0355758	1	1	succinate-semialdehyde dehydrogenase (NAD+) activity
GO:0019203	1	1	1	0.0355758	1	1	carbohydrate
GO:1990055	1	1	1	0.0355758	1	1	phenylacetaldehyde synthase activity
GO:0004070	1	1	1	0.0355758	1	1	aspartate carbamoyltransferase activity
GO:0005363	1	1	1	0.0355758	1	1	maltose transmembrane transporter activity
GO:0004306	1	1	1	0.0355758	1	1	ethanolamine-phosphate cytidylyltransferase activity
GO:0003837	1	1	1	0.0355758	1	1	beta-ureidopropionase activity
GO:0042362	1	1	1	0.0355758	1	1	fat-soluble vitamin biosynthetic process
GO:0010730	1	1	1	0.0355758	1	1	negative regulation of hydrogen peroxide biosynthetic process
GO:0002752	1	1	1	0.0355758	1	1	cell surface pattern recognition receptor signaling pathway
GO:0033617	1	1	1	0.0355758	1	1	mitochondrial respiratory chain complex IV assembly
GO:0042350	1	1	1	0.0355758	1	1	GDP-L-fucose
GO:0034023	1	1	1	0.0355758	1	1	5-(carboxyamino)imidazole ribonucleotide mutase activity
GO:0060148	1	1	1	0.0355758	1	1	positive regulation of posttranscriptional gene silencing
GO:0072660	1	1	1	0.0355758	1	1	maintenance of protein location in plasma membrane
GO:0046487	1	1	1	0.0355758	1	1	glyoxylate metabolic process
GO:0050833	1	1	1	0.0355758	1	1	pyruvate transmembrane transporter activity
GO:0042407	1	1	1	0.0355758	1	1	cristae formation
GO:0071435	1	1	1	0.0355758	1	1	potassium ion export
GO:0071433	1	1	1	0.0355758	1	1	cell wall repair
GO:0004343	1	1	1	0.0355758	1	1	glucosamine 6-phosphate N-acetyltransferase activity
GO:0010133	1	1	1	0.0355758	1	1	proline catabolic process to glutamate
GO:0010176	1	1	1	0.0355758	1	1	homogentisate phytyltransferase activity
GO:0000327	1	1	1	0.0355758	1	1	lytic vacuole within protein storage vacuole
GO:0009320	1	1	1	0.0355758	1	1	phosphoribosylaminoimidazole carboxylase complex
GO:0004359	1	1	1	0.0355758	1	1	glutaminase
GO:0070455	1	1	1	0.0355758	1	1	positive regulation of heme biosynthetic process
GO:0052386	1	1	1	0.0355758	1	1	cell wall thickening
GO:0006646	1	1	1	0.0355758	1	1	phosphatidylethanolamine biosynthetic process
GO:0003842	1	1	1	0.0355758	1	1	1-pyrroline-5-carboxylate dehydrogenase activity
GO:0042538	1	0.465585	0.546258	0.0355758	1	1	hyperosmotic salinity response
GO:0008964	1	1	1	0.0358597	1	1	phosphoenolpyruvate carboxylase activity
GO:0015662	1	1	1	0.0363542	0.118846	1	ATPase activity, coupled to transmembrane movement of ions, phosphorylative mechanism
GO:0009611	1	1	1	0.0411206	0.725696	0.43891	response to wounding
GO:0050790	1	1	1	0.0420517	1	1	regulation
GO:0015937	1	1	1	0.0443722	1	1	coenzyme A biosynthetic process
GO:0006241	1	1	1	0.0462614	1	1	CTP biosynthetic process
GO:0006573	1	1	1	0.0462614	1	1	valine metabolic process
GO:0006228	1	1	1	0.0462614	1	1	UTP biosynthetic process
GO:0006165	1	1	1	0.0462614	1	1	nucleoside
GO:0006183	1	1	1	0.0462614	1	1	GTP biosynthetic process
GO:0005771	1	1	1	0.0462614	0.603012	1	multivesicular
GO:0004616	1	1	1	0.0498053	1	1	phosphogluconate dehydrogenase (decarboxylating) activity
GO:0043631	1	1	1	1	2.76003e-45	1	RNA polyadenylation
GO:0005886	0.295517	1	1	8.96269e-25	3.99314e-43	2.53745e-22	plasma
GO:0031123	1	1	1	1	1.48508e-37	1	RNA 3'-end processing
GO:0009228	1	1	1	1	9.6156e-20	1	thiamine
GO:0004652	1	1	1	1	6.60465e-17	1	polynucleotide adenylyltransferase activity
GO:0008440	1	1	1	1	1.78575e-14	1	inositol-1,4,5-trisphosphate 3-kinase activity
GO:0030968	1	1	1	8.12913e-05	3.58228e-10	0.233778	endoplasmic
GO:0009863	1	1	1	1.1161e-07	5.342e-09	1	salicylic acid mediated signaling pathway
GO:0006468	1	1	1	0.0403009	7.80397e-09	1.99657e-08	protein
GO:0009678	1	1	1	1	3.93972e-08	1	hydrogen-translocating pyrophosphatase activity
GO:0016779	1	1	1	1	6.30356e-08	1	nucleotidyltransferase activity
GO:0051603	1	1	1	2.24621e-05	3.89203e-07	1	proteolysis involved in cellular protein catabolic process
GO:0006605	1	1	1	1	9.96559e-07	0.0341761	protein targeting
GO:0004672	1	1	1	0.0129839	1.57589e-06	2.92452e-05	protein
GO:0006546	0.00256048	1	1	1	2.34359e-06	0.115124	glycine catabolic process
GO:0005794	1	1	1	0.0980696	3.93365e-06	1	Golgi
GO:0006623	1	1	1	1	5.82906e-06	0.000995078	protein targeting to vacuole
GO:0006888	1	1	1	0.514568	5.96778e-06	1	ER
GO:0005839	1	1	1	0.000146905	8.57688e-06	1	proteasome
GO:0080149	1	1	1	1	3.90878e-05	1	sucrose induced translational repression
GO:0000823	1	1	1	1	3.90878e-05	1	inositol-1,4,5-trisphosphate 6-kinase activity
GO:0018131	1	1	1	1	3.90878e-05	1	oxazole or thiazole biosynthetic process
GO:0006780	1	1	1	1	3.90878e-05	1	uroporphyrinogen
GO:0004852	1	1	1	1	3.90878e-05	1	uroporphyrinogen-III synthase activity
GO:0008553	1	1	1	1	3.9458e-05	1	hydrogen-exporting ATPase activity, phosphorylative mechanism
GO:0006098	1	0.0455423	0.72789	0.361143	3.9458e-05	7.86461e-05	pentose-phosphate
GO:0004618	1	1	1	1	0.00012426	1	phosphoglycerate kinase activity
GO:0070696	0.00201866	1	1	1	0.000311973	1	transmembrane receptor protein serine/threonine kinase binding
GO:0004707	1	0.289698	0.00904308	0.00810597	0.000354038	1	MAP
GO:0030131	1	1	1	1	0.000424336	1	clathrin adaptor complex
GO:0000413	1	1	1	0.341666	0.000424336	1	protein
GO:0009853	1	1	1	0.00166074	0.000713539	0.03629	photorespiration
GO:0004326	1	1	1	1	0.000722576	1	tetrahydrofolylpolyglutamate synthase activity
GO:0015030	1	1	1	1	0.000759943	1	Cajal body
GO:0002229	1	1	1	1	0.000759943	1	defense response to oomycetes
GO:0015940	1	1	1	0.00827104	0.000759943	1	pantothenate biosynthetic process
GO:0051707	1	1	0.842015	0.100048	0.000759943	1	response to other organism
GO:0005347	1	1	1	1	0.000842849	1	ATP transmembrane transporter activity
GO:0031396	1	1	1	1	0.000918824	1	regulation of protein ubiquitination
GO:0048478	1	1	1	1	0.000918824	1	replication fork protection
GO:0017186	1	1	1	1	0.000918824	1	peptidyl-pyroglutamic acid biosynthetic process, using glutaminyl-peptide cyclotransferase
GO:0018316	1	1	1	1	0.000918824	1	peptide cross-linking via L-cystine
GO:0000354	1	1	1	1	0.000918824	1	cis assembly of pre-catalytic spliceosome
GO:0006491	1	1	1	0.715138	0.00103459	1	N-glycan processing
GO:0017119	1	1	1	1	0.00103459	1	Golgi transport complex
GO:0004017	0.183201	0.015526	0.277513	1	0.00103459	1	adenylate kinase activity
GO:0019243	1	1	1	0.0537206	0.00128208	0.161173	methylglyoxal catabolic process to D-lactate
GO:0010319	0.027897	1	0.671615	0.64678	0.0013388	0.396633	stromule
GO:0006200	1	1	1	1	0.00143973	1	ATP
GO:0009767	1	1	1	1	0.00146744	1	photosynthetic
GO:0015217	1	1	1	1	0.00307165	1	ADP transmembrane transporter activity
GO:0004048	1	1	1	1	0.00307165	1	anthranilate phosphoribosyltransferase activity
GO:0051252	1	1	1	1	0.00331087	1	regulation of RNA metabolic process
GO:0080024	1	1	1	1	0.00331087	1	indolebutyric acid metabolic process
GO:0004047	1	1	1	1	0.00331087	1	aminomethyltransferase activity
GO:0051536	1	1	1	1	0.00398172	1	iron-sulfur cluster binding
GO:0004712	1	1	1	1	0.00398172	1	protein serine/threonine/tyrosine kinase activity
GO:0043085	1	1	0.037908	0.072071	0.00398172	1	positive
GO:0043531	1	1	1	1	0.00401195	0.185688	ADP
GO:0030095	1	0.28371	1	1	0.0042682	0.0111276	chloroplast photosystem II
GO:0006754	1	1	1	1	0.00457508	1	ATP biosynthetic process
GO:0052541	0.660487	1	0.132976	1	0.00458784	1	plant-type cell wall cellulose metabolic process
GO:0009396	1	1	0.107742	0.0926707	0.00499272	1	folic acid-containing compound biosynthetic process
GO:0016925	1	1	0.162739	1	0.00593693	1	protein
GO:0052546	0.729745	1	0.162739	1	0.00593693	1	cell wall pectin metabolic process
GO:0004617	1	1	1	1	0.0060317	1	phosphoglycerate dehydrogenase activity
GO:0017038	1	1	1	1	0.0060317	1	protein import
GO:0003879	1	1	1	1	0.0060317	1	ATP phosphoribosyltransferase activity
GO:0006486	1	1	1	1	0.0079155	1	protein glycosylation
GO:0043161	1	1	1	0.425673	0.0101146	1	proteasome-mediated
GO:0031901	1	1	1	1	0.0112601	1	early endosome membrane
GO:0004802	1	1	1	1	0.0112601	1	transketolase activity
GO:0071454	1	1	1	1	0.0112601	1	cellular response to anoxia
GO:0008152	0.546381	1	0.413909	0.37763	0.0169642	0.203662	metabolic
GO:0046482	0.116138	1	1	1	0.0178198	1	para-aminobenzoic acid metabolic process
GO:0005750	1	1	1	1	0.0178198	1	mitochondrial respiratory chain complex III
GO:0004298	1	1	1	0.0406287	0.0179346	1	threonine-type endopeptidase activity
GO:0004807	1	1	1	1	0.0179346	1	triose-phosphate isomerase activity
GO:0003864	1	1	1	1	0.0179346	1	3-methyl-2-oxobutanoate hydroxymethyltransferase activity
GO:0016556	1	1	1	0.678735	0.0180469	1	mRNA modification
GO:0055035	1	1	1	0.0745157	0.0182221	1	plastid
GO:0007231	1	1	1	1	0.0182221	1	osmosensory
GO:0000162	1	1	1	0.256856	0.0201181	1	tryptophan
GO:0006721	1	1	1	1	0.0201275	1	terpenoid metabolic process
GO:0090393	1	1	1	1	0.0201275	1	sepal giant cell development
GO:0010248	1	1	1	1	0.0201275	1	establishment or maintenance of transmembrane electrochemical gradient
GO:0006650	1	1	1	1	0.0201275	1	glycerophospholipid metabolic process
GO:0004157	1	1	1	1	0.0201275	1	dihydropyrimidinase activity
GO:0032774	1	1	1	1	0.0201275	1	RNA
GO:0033354	1	1	1	1	0.0201275	1	chlorophyll cycle
GO:0006671	1	1	1	1	0.0201275	1	phytosphingosine metabolic process
GO:0042759	1	1	1	1	0.0201275	1	long-chain fatty acid biosynthetic process
GO:0051766	1	1	1	1	0.0201275	1	inositol trisphosphate kinase activity
GO:0009344	1	1	1	1	0.0201275	1	nitrite reductase complex [NAD(P)H]
GO:0009918	1	1	1	1	0.0201275	1	sterol delta7 reductase activity
GO:0051765	1	1	1	1	0.0201275	1	inositol tetrakisphosphate kinase activity
GO:0006208	1	1	1	1	0.0201275	1	pyrimidine nucleobase catabolic process
GO:0001881	1	1	1	1	0.0201275	1	receptor
GO:0004806	1	1	1	1	0.0210868	1	triglyceride lipase activity
GO:0009407	1	0.702098	1	1	0.022132	1	toxin catabolic process
GO:0045156	1	1	1	1	0.0233405	1	electron transporter, transferring electrons within the cyclic electron transport pathway of photosynthesis activity
GO:0000502	1	1	1	1	0.0235753	1	proteasome
GO:0008180	1	1	1	1	0.0239853	1	COP9 signalosome
GO:0019464	1	1	1	1	0.0245331	0.233778	glycine decarboxylation via glycine cleavage system
GO:0080129	1	1	1	0.143147	0.0270975	1	proteasome core complex assembly
GO:0009705	0.442319	1	1	1	0.0289988	0.505602	plant-type vacuole membrane
GO:0006974	1	1	1	1	0.0289988	1	cellular response to DNA damage stimulus
GO:0018119	1	0.659951	1	0.226848	0.0289988	0.0405747	peptidyl-cysteine
GO:0032877	1	1	1	0.0939551	0.0318687	1	positive regulation of DNA endoreduplication
GO:0005654	1	1	0.302461	1	0.0347198	1	nucleoplasm
GO:0051555	1	1	1	1	0.0347198	1	flavonol
GO:0009625	1	1	0.302461	0.262663	0.0347198	1	response to insect
GO:0000902	1	1	1	0.605437	0.0362061	0.0693323	cell
GO:0016887	1	1	1	1	0.0455674	1	ATPase
GO:0000311	1	1	1	1	0.0455759	1	plastid large ribosomal subunit
GO:0051788	1	1	1	0.121453	0.0457619	1	response to misfolded protein
GO:0004175	1	1	1	0.124597	0.0457619	1	endopeptidase
GO:0005515	1.42074e-05	1	0.717544	0.828606	1	1.07374e-61	protein
GO:0016558	1	1	1	1	0.816191	1.7041e-43	protein
GO:0048573	9.31034e-05	1	1	1	1	1.1325e-40	photoperiodism, flowering
GO:0015976	1	1	1	1	1	7.69248e-17	carbon
GO:0006635	1	1	1	1	0.000255971	8.49378e-16	fatty
GO:0006891	1	1	1	1	1	1.57589e-14	intra-Golgi vesicle-mediated transport
GO:0004385	1	1	1	1	1	5.60316e-12	guanylate kinase activity
GO:0032880	1	1	1	1	1	5.66252e-12	regulation of protein localization
GO:0009742	1	1	1	1	0.288348	8.30438e-12	brassinosteroid mediated signaling pathway
GO:0009543	1.87193e-07	2.1538e-09	0.0132881	1	1	6.9446e-11	chloroplast thylakoid lumen
GO:0009707	1	4.58287e-06	1	1	1	2.17114e-10	chloroplast
GO:0010181	0.147488	1	1	0.0757358	1	3.60585e-10	FMN binding
GO:0006914	0.658581	1	1	1	1	3.60585e-10	autophagy
GO:0009963	0.0821909	1	1	0.100048	0.116856	3.85811e-10	positive regulation of flavonoid biosynthetic process
GO:0004089	0.76152	1	1	1	1	3.85811e-10	carbonate dehydratase activity
GO:0006470	1	1	0.728373	0.0480142	1	2.92538e-09	protein
GO:0004416	1	1	1	1	0.119503	5.6091e-09	hydroxyacylglutathione hydrolase activity
GO:0006777	0.861578	0.000207632	1	1	1	1.54221e-08	Mo-molybdopterin cofactor biosynthetic process
GO:0006301	1	1	1	1	0.634832	2.22227e-08	postreplication repair
GO:0004371	1	1	1	1	1	2.34226e-08	glycerone kinase activity
GO:0048767	0.954556	1	1	1	1	4.76823e-08	root
GO:0006556	1	1	1	1	1	8.39983e-08	S-adenosylmethionine biosynthetic process
GO:0009750	0.0267667	1	1	1	0.787509	2.28704e-07	response to fructose
GO:0003958	1	1	1	1	1	3.12664e-07	NADPH-hemoprotein reductase activity
GO:0009755	1	1	1	1	1	3.12664e-07	hormone-mediated
GO:0042744	1	1	0.00502237	1	0.21864	3.81571e-07	hydrogen peroxide catabolic process
GO:0005778	1	0.976048	1	0.0281173	1	5.40136e-07	peroxisomal
GO:0009932	0.0817562	1	1	1	1	6.03502e-07	cell tip growth
GO:0006542	1	1	1	0.293392	1	7.61938e-07	glutamine biosynthetic process
GO:0006499	1	1	1	1	0.175218	8.58829e-07	N-terminal protein myristoylation
GO:0009698	0.0013117	1	1	1	1	1.04436e-06	phenylpropanoid metabolic process
GO:0006944	1	1	1	0.220099	3.9429e-05	1.57654e-06	membrane fusion
GO:0004872	1	1	1	1	1	1.89514e-06	receptor
GO:0004674	1	1	1	0.0462614	0.000898427	2.95673e-06	protein
GO:0006487	1	1	1	1	1	3.16878e-06	protein
GO:0008270	0.899895	1	1	1	1	3.32391e-06	zinc
GO:0048278	1	1	1	1	1	4.05295e-06	vesicle docking
GO:0010598	1	1	1	1	0.126005	4.44409e-06	NAD(P)H dehydrogenase complex (plastoquinone)
GO:0009156	1	1	1	1	1	4.88259e-06	ribonucleoside monophosphate biosynthetic process
GO:2001020	1	1	1	1	1	4.88259e-06	regulation of response to DNA damage stimulus
GO:0003935	1	1	1	0.514568	1	6.78748e-06	GTP cyclohydrolase II activity
GO:0004842	1	1	1	1	1	9.96488e-06	ubiquitin-protein transferase activity
GO:0016881	1	1	1	1	1	1.00692e-05	acid-amino acid ligase activity
GO:0004356	1	1	1	0.000607045	1	1.14754e-05	glutamate-ammonia ligase activity
GO:0010351	1	1	1	1	1	1.15581e-05	lithium ion transport
GO:0044265	1	1	1	1	1	1.20195e-05	cellular macromolecule catabolic process
GO:0009231	1	1	1	1	1	1.51825e-05	riboflavin biosynthetic process
GO:0048193	1	1	1	0.425673	0.000178446	2.48679e-05	Golgi
GO:0042128	1	1	1	0.239021	1	3.06275e-05	nitrate assimilation
GO:0043407	1	1	1	1	1	3.84449e-05	negative regulation of MAP kinase activity
GO:0009805	0.00215554	1	1	1	1	3.91172e-05	coumarin biosynthetic process
GO:0016791	0.367703	1	1	1	1	4.83324e-05	phosphatase
GO:0008773	1	1	1	1	1	4.95349e-05	[protein-PII] uridylyltransferase activity
GO:0061416	1	1	1	1	1	4.95349e-05	regulation of transcription from RNA polymerase II promoter in response to salt stress
GO:0006987	1	1	1	1	1	4.95349e-05	activation of signaling protein activity involved in unfolded protein response
GO:0071555	0.214948	1	1	1	1	6.58847e-05	cell wall organization
GO:0005853	1	1	0.322196	1	1	6.58847e-05	eukaryotic translation elongation factor 1 complex
GO:0015198	1	1	1	1	1	6.58847e-05	oligopeptide transporter activity
GO:0008686	1	1	1	0.425673	1	6.65869e-05	3,4-dihydroxy-2-butanone-4-phosphate synthase activity
GO:0006163	1	1	1	1	1	6.65869e-05	purine nucleotide metabolic process
GO:0005388	1	1	1	1	1	0.000109728	calcium-transporting ATPase activity
GO:0048046	1	1	1	0.00335478	1	0.000109728	apoplast
GO:0009738	1	1	1	0.0908044	1	0.000159548	abscisic
GO:0006779	1	0.00737864	0.0629731	1	1	0.000160963	porphyrin-containing compound biosynthetic process
GO:0004478	1	1	1	1	1	0.000172588	methionine
GO:0009873	0.0432574	1	1	1	1	0.000172588	ethylene-activated
GO:0010099	1	0.617304	1	1	1	0.000197654	regulation of photomorphogenesis
GO:0019253	1	1	1	1	0.816191	0.000197654	reductive pentose-phosphate cycle
GO:0080167	0.27958	0.254088	1	0.311341	1	0.000261164	response to karrikin
GO:0010200	1	1	1	0.0118118	0.000913559	0.000276872	response to chitin
GO:0006801	1	1	1	0.0159284	1	0.000386812	superoxide metabolic process
GO:0006511	1	1	1	1	0.675261	0.000393019	ubiquitin-dependent
GO:0016787	1	1	1	1	0.117505	0.000395936	hydrolase activity
GO:0000956	1	1	1	1	1	0.000460517	nuclear-transcribed mRNA catabolic process
GO:0044249	1	1	1	1	1	0.000466818	cellular
GO:0006807	1	1	1	1	1	0.000494585	nitrogen
GO:0004713	1	1	1	0.00135776	0.515356	0.000566717	protein tyrosine kinase activity
GO:0017001	1	1	1	1	1	0.000589272	antibiotic catabolic process
GO:0008940	1	1	1	1	1	0.000589272	nitrate reductase activity
GO:0080182	1	1	1	1	1	0.000589272	histone H3-K4 trimethylation
GO:0008974	1	1	1	1	1	0.000589272	phosphoribulokinase activity
GO:0019477	1	1	1	1	1	0.000589272	L-lysine catabolic process
GO:0030243	1	1	1	1	1	0.000670476	cellulose metabolic process
GO:0000303	0.443754	1	1	1	1	0.000733851	response to superoxide
GO:0005956	1	1	1	1	1	0.000769248	protein kinase CK2 complex
GO:0005744	1	1	0.00303761	1	1	0.000803945	mitochondrial
GO:0006598	0.00182562	1	1	1	1	0.00100616	polyamine catabolic process
GO:0010817	0.180913	1	1	1	1	0.00109922	regulation of hormone levels
GO:0006562	1	1	1	1	1	0.00121594	proline catabolic process
GO:0005789	1	1	1	1	1	0.00151273	endoplasmic
GO:0016597	1	0.0362209	1	0.707212	1	0.00173983	amino acid binding
GO:0009626	1	1	1	1	0.314366	0.00173983	plant-type
GO:0006529	1	1	0.277513	1	1	0.00177257	asparagine biosynthetic process
GO:0004722	1	1	0.674343	1	1	0.00181917	protein serine/threonine phosphatase activity
GO:0000139	1	1	1	1	1	0.00190786	Golgi
GO:0004749	1	1	1	1	1	0.0019997	ribose phosphate diphosphokinase activity
GO:0009654	1	0.42717	1	1	0.0126903	0.00232261	photosystem II oxygen evolving complex
GO:0010011	0.472229	1	1	1	1	0.00289929	auxin
GO:0044242	1	1	0.0549798	1	1	0.00313397	cellular lipid catabolic process
GO:0009267	0.859609	1	1	0.93464	1	0.00313397	cellular response to starvation
GO:0016992	1	1	1	0.93464	1	0.00313397	lipoate synthase activity
GO:0051865	1	1	1	1	1	0.00314339	protein autoubiquitination
GO:0005525	1	1	1	1	1	0.00317017	GTP binding
GO:0003978	1	1	1	0.885355	1	0.00410856	UDP-glucose 4-epimerase activity
GO:0031234	1	1	1	1	1	0.00477028	extrinsic
GO:0006625	1	1	1	1	0.119503	0.00477028	protein targeting to peroxisome
GO:0051017	1	1	1	1	1	0.00528976	actin
GO:0030148	1	1	1	1	1	0.00528976	sphingolipid biosynthetic process
GO:0009741	0.22841	0.702098	1	1	1	0.00552688	response to brassinosteroid
GO:0034051	1	1	1	1	1	0.00593181	negative regulation of plant-type hypersensitive response
GO:0006574	1	1	1	1	1	0.00593181	valine catabolic process
GO:0046658	0.00757663	1	1	0.00845809	0.557513	0.00593181	anchored component of plasma membrane
GO:0019008	1	1	1	1	1	0.00697428	molybdopterin synthase complex
GO:0008824	1	1	1	1	1	0.00697428	cyanate hydratase activity
GO:0009496	1	1	1	1	1	0.00697428	plastoquinol--plastocyanin reductase activity
GO:0017009	1	1	1	1	1	0.00697428	protein-phycocyanobilin linkage
GO:0008987	1	1	1	1	1	0.00697428	quinolinate synthetase A activity
GO:0032857	1	1	1	1	1	0.00697428	activation of ARF GTPase activity
GO:0000306	1	1	1	1	1	0.00697428	extrinsic component of vacuolar membrane
GO:0008800	1	1	1	1	1	0.00697428	beta-lactamase
GO:0004038	1	1	1	1	1	0.00697428	allantoinase activity
GO:1901485	1	1	1	1	1	0.00697428	positive regulation of transcription factor catabolic process
GO:0009082	1	1	0.44567	1	1	0.00787551	branched-chain amino acid biosynthetic process
GO:0005375	1	1	1	1	1	0.0079276	copper ion transmembrane transporter activity
GO:0009825	0.280396	1	1	1	1	0.0089415	multidimensional
GO:0009505	1	1	1	0.403333	0.512135	0.00896751	plant-type
GO:0007264	1	1	1	1	1	0.0090001	small
GO:0043481	0.15891	1	1	1	1	0.011201	anthocyanin
GO:0010328	1	1	1	1	1	0.011201	auxin influx transmembrane transporter activity
GO:0004657	1	1	1	1	1	0.011201	proline dehydrogenase activity
GO:0006886	1	1	1	1	0.631157	0.011201	intracellular
GO:0008287	1	1	0.283329	1	1	0.0132312	protein serine/threonine phosphatase complex
GO:0016311	1	1	1	0.143147	1	0.0147809	dephosphorylation
GO:0019887	1	1	1	1	1	0.0178514	protein kinase regulator activity
GO:0002679	1	1	1	0.327161	0.0716517	0.0182965	respiratory burst involved in defense response
GO:0008534	1	1	1	1	1	0.0201609	oxidized purine nucleobase lesion DNA N-glycosylase activity
GO:1900111	1	1	1	1	1	0.0201609	positive regulation of histone H3-K9 dimethylation
GO:0010427	1	1	1	1	1	0.0201609	abscisic acid binding
GO:0031351	1	1	1	1	1	0.0201609	integral component of plastid membrane
GO:0019904	0.258122	1	1	0.885355	1	0.0205244	protein domain specific binding
GO:0005960	1	1	1	1	0.919108	0.0214595	glycine cleavage complex
GO:0015784	1	1	1	1	1	0.0225634	GDP-mannose
GO:0042282	1	1	1	1	1	0.0225634	hydroxymethylglutaryl-CoA reductase activity
GO:0000271	0.0432574	1	1	1	1	0.0252986	polysaccharide
GO:0010306	1	1	1	1	1	0.0277707	rhamnogalacturonan II biosynthetic process
GO:0010008	1	1	1	0.568577	0.248932	0.0277707	endosome
GO:0016762	1	1	1	1	1	0.0311976	xyloglucan
GO:0004758	1	1	1	1	1	0.0315821	serine C-palmitoyltransferase activity
GO:0006909	1	1	1	1	1	0.0315821	phagocytosis
GO:0008272	1	1	1	1	1	0.0341761	sulfate transport
GO:0008076	1	1	1	1	1	0.0341761	voltage-gated potassium channel complex
GO:0008327	1	1	0.728373	1	1	0.0342985	methyl-CpG binding
GO:0016772	1	1	1	1	0.0660186	0.0373663	transferase activity, transferring phosphorus-containing groups
GO:0008333	1	1	1	1	0.375292	0.0471311	endosome to lysosome transport
GO:0006809	1	1	0.628999	1	1	0.0471311	nitric
GO:0002238	1	1	1	0.783484	1	0.0471311	response to molecule of fungal origin
GO:0009610	1	1	1	1	1	0.0471311	response to symbiotic fungus
GO:0004612	1	1	1	1	1	0.0473173	phosphoenolpyruvate carboxykinase (ATP) activity
GO:0005777	0.984207	1	3.7394e-07	3.7394e-07	0.166922	0.031212	peroxisome
*p-value of enrichment adjusted using Benjamini-Hochberg
