# Supplementary material for: Prevalence, Evolution, and cis-Regulation of Diel Transcription in Chlamydomonas reinhardtii
Source: G3 (Bethesda). 2014 Oct 28;4(12):2461–71. doi: 10.1534/g3.114.015032 (PMC4267941; doi:10.1534/g3.114.015032)
Supplement: Supporting Information [file supp_g3.114.015032_FileS6.xlsx]

## Sheet: Sheet1
File S6. Phase, AUC-ROC, and composition of the best predicted expression clusters
Cluster ID	Phase	AUR-ROC	Genes
1	12	0.713	Cre12.g526750, Cre16.g665400, Cre10.g455500,Cre12.g529100, Cre10.g427700, Cre06.g272900, Cre13.g573900, Cre16.g672300, Cre12.g512000, Cre08.g362450, Cre10.g461050, Cre05.g244950, Cre09.g408200
11	3	0.814	Cre17.g715250, Cre07.g350850, Cre12.g488950, Cre07.g315150, Cre03.g172450, Cre06.g251150, Cre01.g025050, Cre06.g273700, Cre07.g356350 , Cre05.g243800, Cre03.g193950, Cre06.g307500
26	9	0.712	Cre05.g240650, Cre13.g568750, Cre09.g401150, Cre12.g522050, Cre16.g658782, Cre03.g172350, Cre10.g432700, Cre10.g433650, Cre17.g726900, Cre02.g076100, Cre11.g482750, Cre13.g576150, Cre03.g175850, Cre12.g544900, Cre16.g668650, Cre03.g200500, Cre07.g342750
31	12	0.701	Cre01.g048300, Cre02.g116000, Cre01.g025300, Cre01.g055250, Cre16.g688900 ,Cre05.g240050, Cre10.g461550, Cre13.g574000, Cre02.g146950, Cre01.g041850, Cre08.g377850, Cre09.g389400, Cre13.g603400, Cre02.g095550, Cre10.g460300, Cre01.g003050, Cre07.g344650, Cre14.g633900, Cre02.g097850, Cre10.g449650, Cre09.g401700, Cre16.g658400, Cre16.g693819, Cre17.g716500, Cre16.g693800, Cre10.g423800, Cre01.g00…
34	3	0.724	Cre10.g425900, Cre01.g047750, Cre06.g282500, Cre08.g359750, Cre03.g207050, Cre12.g529650, Cre02.g091100, Cre02.g106600, Cre02.g097400, Cre12.g537800, Cre06.g308250, Cre10.g430400, Cre09.g388200
42	3	0.867	Cre01.g040000, Cre13.g568900, Cre17.g701200, Cre09.g411100, Cre12.g504200, Cre02.g075700, Cre12.g532550, Cre10.g420750, Cre09.g400650, Cre13.g568650, Cre07.g331900
49	15	0.765	Cre08.g363700, Cre03.g169400, Cre07.g330300, Cre03.g204450, Cre17.g705500, Cre02.g077550, Cre08.g370400, Cre06.g275100, Cre12.g515850
60	15	0.705	Cre16.g673700, Cre10.g420900, Cre14.g611250, Cre07.g341700, Cre09.g401450, Cre01.g036100, Cre17.g724000, Cre06.g291350, Cre11.g467600, Cre09.g392850, Cre12.g497250, Cre01.g048000, Cre01.g048250, Cre09.g410200, Cre12.g492850, Cre16.g664100, Cre13.g567150, Cre10.g436053, Cre16.g660750, Cre09.g389350, Cre17.g738500, Cre12.g521100, Cre08.g374000, Cre01.g020050, Cre16.g679350, Cre10.g422000, Cre07.g34…
69	3	0.72	Cre05.g237050, Cre03.g203600, Cre03.g197650, Cre16.g650050, Cre10.g443500, Cre04.g222750, Cre16.g694450, Cre05.g248000, Cre12.g498700, Cre03.g181250, Cre02.g118100, Cre03.g207200, Cre13.g566000, Cre06.g296400
76	12	0.746	Cre17.g719000, Cre10.g455300, Cre17.g741850, Cre03.g171350, Cre17.g741000, Cre17.g734500, Cre10.g453450, Cre08.g385200, Cre05.g241300, Cre12.g513200, Cre09.g410600, Cre06.g251000
78	12	0.841	Cre14.g626750, Cre03.g178650, Cre11.g482700, Cre16.g657550, Cre12.g558600, Cre08.g376350, Cre06.g286950, Cre02.g080150, Cre16.g667850
80	0	0.707	Cre08.g366579, Cre07.g320500, Cre05.g243472, Cre03.g206350, Cre14.g623700, Cre06.g253200, Cre06.g294800, Cre11.g481150, Cre10.g438650, Cre03.g171950, Cre06.g286350, Cre11.g477900, Cre12.g529250, Cre12.g514400, Cre05.g246376, Cre06.g255500, Cre17.g698400, Cre16.g668550, Cre14.g633700, Cre06.g294000, Cre17.g697050, Cre17.g740300, Cre09.g413900, Cre14.g631350
84	12	0.752	Cre17.g711950, Cre01.g011200, Cre11.g469350, Cre06.g298700, Cre16.g652850, Cre10.g458000, Cre04.g226050, Cre01.g018200, Cre16.g684700, Cre02.g145150, Cre01.g048100, Cre10.g433800, Cre08.g382689, Cre02.g093700, Cre04.g221350, Cre08.g375500, Cre07.g332786, Cre01.g013769, Cre13.g604800, Cre13.g592050, Cre10.g438400, Cre13.g580100, Cre16.g684600, Cre06.g278200, Cre13.g561850, Cre03.g181400
85	6	0.733	Cre16.g690200, Cre09.g408000, Cre03.g148350, Cre11.g483200, Cre03.g162650, Cre08.g362200, Cre17.g730200, Cre03.g172250, Cre14.g618200, Cre17.g699150, Cre10.g430250, Cre02.g087300, Cre06.g291800, Cre10.g458950, Cre10.g437050
87	15	0.71	Cre01.g017100, Cre17.g737084, Cre05.g247650, Cre09.g390450, Cre06.g275400, Cre02.g090350, Cre06.g303450, Cre06.g278850, Cre03.g205750, Cre06.g294050, Cre02.g104150, Cre01.g001000, Cre06.g255800, Cre16.g665950, Cre07.g357450, Cre02.g105550, Cre11.g480300, Cre02.g096950, Cre06.g272760, Cre02.g104100, Cre07.g322300, Cre03.g185000, Cre17.g705650, Cre03.g158464, Cre13.g589600, Cre06.g261550, Cre17.g72…
97	12	0.751	Cre02.g074050, Cre07.g345450, Cre02.g088750, Cre12.g506050, Cre09.g404850, Cre02.g115300, Cre10.g437829, Cre07.g329400, Cre09.g387250, Cre03.g162050, Cre01.g032450, Cre03.g199300, Cre11.g474850, Cre06.g300900, Cre14.g618350, Cre16.g688750, Cre13.g605100, Cre04.g226450, Cre11.g474700, Cre06.g276250, Cre12.g510550, Cre14.g629550, Cre06.g305050, Cre08.g370200, Cre03.g204900, Cre12.g489450
98	15	0.735	Cre01.g027400, Cre08.g376950, Cre10.g436000, Cre01.g010296, Cre12.g488500, Cre06.g299250, Cre06.g286800, Cre14.g632100, Cre03.g179450, Cre03.g173700, Cre03.g157900, Cre01.g017450, Cre06.g288600, Cre01.g023450, Cre12.g512500, Cre06.g266500, Cre03.g200600, Cre10.g433050, Cre09.g408900, Cre17.g741750, Cre12.g513550, Cre17.g735650, Cre12.g512450, Cre03.g164200, Cre01.g026500, Cre06.g281200, Cre12.g56…
107	6	0.748	Cre08.g383300, Cre13.g579350, Cre01.g036250, Cre10.g453700, Cre17.g720000, Cre06.g308400, Cre10.g446250, Cre01.g026250, Cre03.g158850, Cre01.g054400, Cre06.g267300, Cre13.g590300, Cre01.g013000, Cre16.g688700
126	15	0.721	Cre03.g180650, Cre17.g722100, Cre13.g575300, Cre17.g703200, Cre03.g204600, Cre02.g078650, Cre02.g088100, Cre03.g150050, Cre06.g268450, Cre09.g401400, Cre10.g427600, Cre05.g235800, Cre12.g497800, Cre16.g682450, Cre01.g017250, Cre10.g432400, Cre07.g349300, Cre06.g280000, Cre03.g186500, Cre13.g563950, Cre01.g049750, Cre10.g432750, Cre17.g742700, Cre14.g618800, Cre12.g523900, Cre03.g150950, Cre10.g44…
128	12	0.815	Cre03.g185100, Cre08.g378100, Cre12.g488050, Cre06.g251800, Cre12.g527300, Cre13.g573750, Cre14.g631000, Cre08.g361400, Cre07.g336650, Cre02.g108150, Cre04.g213050, Cre02.g084200, Cre10.g441550, Cre09.g389950, Cre06.g299300
129	15	0.737	Cre02.g104800, Cre10.g467100, Cre12.g505300, Cre02.g115250, Cre06.g273450, Cre03.g170550, Cre05.g237750, Cre02.g086650, Cre02.g098300, Cre03.g200900, Cre03.g161050, Cre12.g509150, Cre01.g029100, Cre02.g099350, Cre06.g281750, Cre12.g522400, Cre12.g486750, Cre17.g696650, Cre10.g456350, Cre12.g522300, Cre12.g516050, Cre08.g385250, Cre08.g368250, Cre01.g022850, Cre12.g531400, Cre06.g270150, Cre12.g52…
153	18	0.753	Cre06.g306250, Cre06.g280450, Cre06.g279300, Cre12.g509250, Cre07.g331050, Cre10.g444450, Cre17.g737800, Cre13.g581100, Cre03.g206650, Cre17.g720500, Cre10.g441800, Cre16.g683050, Cre06.g266950, Cre01.g043750, Cre06.g303400, Cre06.g307250, Cre10.g417950, Cre10.g454650, Cre12.g526850, Cre13.g573050, Cre01.g042900, Cre06.g308050, Cre05.g234150, Cre02.g119150, Cre12.g510600, Cre06.g311550
161	0	0.727	Cre10.g456300, Cre17.g738600, Cre13.g591750, Cre12.g512950, Cre04.g222850, Cre01.g030750, Cre13.g566100, Cre10.g455350, Cre14.g609100, Cre06.g255150, Cre03.g203700, Cre11.g476250, Cre16.g668450, Cre16.g668300, Cre12.g542300, Cre10.g462400, Cre12.g547900, Cre17.g741800, Cre12.g524250, Cre07.g315432, Cre02.g110850, Cre02.g114500, Cre07.g337850, Cre01.g013550, Cre01.g004124, Cre16.g684250, Cre03.g20…
168	12	0.738	Cre02.g100000, Cre07.g338000, Cre06.g295700, Cre05.g233350, Cre03.g181450, Cre03.g161150, Cre07.g316850, Cre06.g280800, Cre10.g455850, Cre17.g716400, Cre16.g695500, Cre01.g023150, Cre06.g291550
180	21	0.756	Cre02.g103800, Cre05.g235850, Cre17.g716750, Cre13.g603050, Cre03.g154300, Cre08.g367950, Cre11.g468900, Cre10.g422750, Cre16.g670450, Cre09.g390300, Cre07.g319650, Cre07.g351200, Cre02.g104200, Cre10.g457550, Cre16.g671700, Cre11.g475300, Cre03.g149550, Cre12.g507500, Cre16.g664200, Cre10.g452950, Cre02.g075950, Cre03.g168786, Cre05.g239650, Cre14.g626450, Cre12.g556800, Cre13.g589750, Cre17.g72…
191	15	0.879	Cre16.g691550, Cre12.g522950, Cre12.g491050, Cre03.g207900, Cre17.g720350, Cre03.g155300, Cre08.g372550, Cre07.g330750, Cre03.g176150
206	0	0.759	Cre03.g199000, Cre01.g037250, Cre14.g610100, Cre06.g282300, Cre06.g294950, Cre03.g207250, Cre02.g088850, Cre10.g438600, Cre10.g435800
215	6	0.732	Cre02.g119050, Cre12.g515450, Cre01.g010500, Cre10.g449450, Cre17.g732850, Cre12.g501150, Cre09.g391700, Cre16.g695100, Cre08.g360950, Cre16.g695850, Cre03.g166500, Cre16.g681400, Cre03.g193500, Cre13.g566200, Cre07.g346800, Cre04.g223800, Cre06.g259150, Cre02.g114450, Cre09.g409336
