# Supplementary material for: Prevalence, Evolution, and cis-Regulation of Diel Transcription in Chlamydomonas reinhardtii
Source: G3 (Bethesda). 2014 Oct 28;4(12):2461–71. doi: 10.1534/g3.114.015032 (PMC4267941; doi:10.1534/g3.114.015032)
Supplement: Supporting Information [file supp_g3.114.015032_FileS8.xlsx]

## Sheet: Sheet1
File S8. Phase, AUC-ROC, and composition of the best predicted functional clusters
GO Term	Phase	AUR-ROC	Genes
GO:0005618	3	0.771	Cre22.g763250, Cre01.g039250, Cre06.g290950, Cre12.g537800, Cre10.g417700, Cre16.g660200, Cre12.g498900, Cre06.g251400, Cre08.g359750, Cre13.g568650, Cre10.g456200, Cre14.g630100, Cre07.g331900, Cre06.g282500, Cre02.g106600, Cre12.g489100, Cre12.g514500, Cre12.g510450, Cre06.g272800, Cre09.g411100, Cre02.g134700, Cre13.g573351
GO:0005730	3	0.75	Cre13.g595250, Cre08.g360900, Cre01.g011000, Cre01.g039250, Cre12.g528750, Cre10.g417700, Cre12.g529650, Cre12.g504200, Cre16.g660200, Cre16.g661050, Cre14.g617900, Cre12.g532550, Cre06.g308250, Cre12.g498900, Cre12.g498250, Cre08.g359750, Cre16.g671550, Cre16.g666301, Cre02.g075700, Cre09.g388200, Cre13.g568650, Cre10.g456200, Cre13.g568900, Cre12.g494050, Cre02.g091100, Cre04.g211800, Cre14.g63…
GO:0005929	21	0.721	Cre02.g073750, Cre12.g536550, Cre11.g477600, Cre06.g250300, Cre01.g058400, Cre12.g527800, Cre02.g146650, Cre02.g127950, Cre14.g624950, Cre10.g467000, Cre03.g204150, Cre17.g714250, Cre12.g484250, Cre05.g242500, Cre03.g181150, Cre02.g135900, Cre07.g351650, Cre11.g476050, Cre01.g050450, Cre17.g703900Cre05.g242550, Cre11.g476850, Cre03.g187200, Cre09.g403800, Cre01.g051250, Cre12.g528850, Cre08.g3626…
GO:0006412	3	0.708	Cre13.g595250, Cre08.g360900, Cre08.g359750, Cre01.g011000, Cre01.g039250, Cre06.g290950, Cre26.g773500, Cre12.g537800, Cre10.g417700, Cre12.g529650, Cre12.g504200, Cre01.g047750, Cre01.g050308, Cre16.g661050, Cre14.g617900, Cre12.g532550, Cre17.g701650, Cre16.g674350, Cre12.g498900, Cre14.g630100, Cre10.g420750, Cre16.g666301, Cre02.g075700, Cre09.g388200, Cre06.g282500, Cre13.g568650, Cre10.g45…
GO:0009190	0	0.727	Cre09.g412600, Cre13.g603350, Cre02.g117000, Cre12.g489900, Cre11.g477400, Cre09.g387350, Cre13.g606250, Cre05.g246150, Cre02.g100450
GO:0009522	6	0.705	Cre17.g720250, Cre06.g284250, Cre06.g283950, Cre32.g781300, Cre17.g724300, Cre03.g156900, Cre03.g165100, Cre06.g285250, Cre09.g412100
GO:0009543	3	0.722	Cre15.g636050, Cre12.g534700, Cre03.g182150, Cre05.g243800, Cre02.g132800, Cre06.g303300, Cre02.g082500, Cre06.g273700, Cre17.g721700
GO:0016849	0	0.718	Cre09.g412600, Cre13.g603350, Cre02.g117000, Cre12.g489900, Cre11.g477400, Cre09.g387350, Cre13.g606250, Cre05.g246150, Cre02.g100450
GO:0019843	3	0.718	Cre02.g106600, Cre06.g308250, Cre12.g494050, Cre12.g498900, Cre08.g359750, Cre04.g211800, Cre12.g514500, Cre01.g050308, Cre06.g272800, Cre10.g430400, Cre07.g331900
GO:0022625	3	0.727	Cre13.g595250, Cre01.g011000, Cre26.g773500, Cre12.g537800, Cre12.g529650, Cre10.g417700, Cre16.g661050, Cre14.g617900, Cre12.g532550, Cre17.g701650, Cre14.g630100, Cre10.g420750, Cre02.g075700, Cre09.g388200, Cre02.g126450, Cre13.g568900, Cre12.g494050, Cre01.g047750, Cre02.g091100, Cre04.g211800, Cre12.g484050, Cre10.g459250, Cre01.g040000, Cre12.g489100, Cre14.g621450, Cre02.g134700, Cre10.g43…
GO:0022627	3	0.717	Cre02.g106600, Cre08.g360900, Cre07.g331900, Cre12.g498900, Cre06.g272800, Cre01.g039250, Cre12.g498250, Cre08.g359750, Cre06.g308250, Cre10.g432800, Cre16.g682300, Cre09.g400650, Cre09.g411100, Cre16.g666301, Cre12.g504200, Cre12.g510450, Cre16.g660200, Cre13.g568650, Cre03.g203450, Cre10.g456200
GO:0030030	21	0.741	Cre12.g484250, Cre02.g073750, Cre12.g494800, Cre05.g242500, Cre01.g058400, Cre11.g476050, Cre14.g624950, Cre09.g403800, Cre06.g251200
